# Supplementary material
Source: PubMed Central journal article supplement (PMC6746246)
Supplement: NIHMS1048590-supplement-SI.pdf [file NIHMS1048590-supplement-SI.pdf]

## Supporting Information

### Enantioselective Synthesis of Homoisoflavanones by Asymmetric Transfer Hydrogenation and Their Biological Evaluation for Antiangiogenic Activity

Myunghoe Heo,<sup>†</sup> Bit Lee,<sup>†</sup> Kamakshi Sishtla,<sup>‡,§</sup> Xiang Fei,<sup>†</sup> Sanha Lee,<sup>†</sup> Soojun Park,<sup>¶</sup> Yue Yuan,<sup>†</sup> Seul Lee,<sup>†</sup> Sangil Kwon,<sup>†</sup> Jungeun Lee,<sup>†</sup> Sanghee Kim,<sup>¶</sup> Timothy W. Corson,<sup>\*,‡,§,||,⊥,#</sup> and Seung-Yong Seo<sup>\*,†</sup>

<sup>†</sup>College of Pharmacy, Gachon University, Incheon 21936, Republic of Korea

<sup>‡</sup>Eugene and Marilyn Glick Eye Institute, <sup>§</sup>Department of Ophthalmology, <sup>#</sup>Department of Biochemistry and Molecular Biology, <sup>||</sup>Department of Pharmacology and Toxicology, and <sup>⊥</sup>Melvin and Bren Simon Cancer Center, Indiana University School of Medicine, Indianapolis, Indiana 46202, United States

<sup>¶</sup>College of Pharmacy, Seoul National University, Seoul 08826, Republic of Korea

#### Table of contents

|                                                                                                                                                                                                                    |     |
|--------------------------------------------------------------------------------------------------------------------------------------------------------------------------------------------------------------------|-----|
| 1. Purity and peak attributions of the homoisoflavonoid analogs                                                                                                                                                    | S02 |
| 2. 2D NOESY NMR spectroscopy of <i>cis</i> - <b>9a</b> and <i>trans</i> - <b>9a</b>                                                                                                                                | S03 |
| 3. Determination of absolute configuration of ( <i>R,R</i> )- <b>9a</b> and ( <i>S,S</i> )- <b>9a</b> using ECD spectra                                                                                            | S05 |
| 4. Matched/mismatched effects on homoisoflavanones (( <i>R</i> )- <b>2</b> and ( <i>S</i> )- <b>2</b> ) in asymmetric transfer hydrogenation using catalysts ( <i>R,R</i> )- <b>4</b> and ( <i>S,S</i> )- <b>4</b> | S07 |
| 5. Effect of homoisoflavonoids on tubulin polymerization                                                                                                                                                           | S09 |
| 6. Copies of <sup>1</sup> H and <sup>13</sup> C NMR spectra                                                                                                                                                        | S11 |
| 7. Copies of chiral HPLC                                                                                                                                                                                           | S37 |

## 1. Purity of synthetic compounds

| compounds        | retention time (min) | purity (area %) |
|------------------|----------------------|-----------------|
| rac-1            | 2.5                  | >95             |
| (R)-1            | 2.5                  | >95             |
| (S)-1            | 2.5                  | >95             |
| rac-2            | 2.7                  | >95             |
| (R)-2            | 2.6                  | >95             |
| (S)-2            | 2.6                  | >95             |
| rac-3            | 11.2                 | >95             |
| (R,S)-3          | 11.3                 | >95             |
| (S,S)-3          | 11.2                 | >95             |
| (R,R)-3          | 11.3                 | >95             |
| (S,R)-3          | 11.2                 | >95             |
| <i>cis</i> -9a   | 2.5                  | >95             |
| <i>trans</i> -9a | 2.5                  | >95             |
| (3R,4R)-9a       | 2.5                  | >95             |
| (3S,4S)-9a       | 2.5                  | >95             |
| rac-10           | 4.1                  | >95             |
| (S)-10           | 4.1                  | >95             |
| (R)-10           | 4.1                  | >95             |

### HPLC conditions:

System: Agilent 1290 infinity2 binary LC

Detector: Agilent 1290 infinity2 UV detector, 256 nm

Column: Peakman SP column C18, 5  $\mu$ M 1.5  $\times$  250 mm

Sample diluent: 99.6% methanol

Mobile phase: 60% MeCN/Water

Mode: Isocratic system

Flow rate: 0.2 mL/min

Injection volume: 2  $\mu$ L

## 2. 2D NOESY NMR spectroscopy of *cis-9a* and *trans-9a*

**Figure S1.** 2D NOESY NMR spectroscopy of *cis-9a*

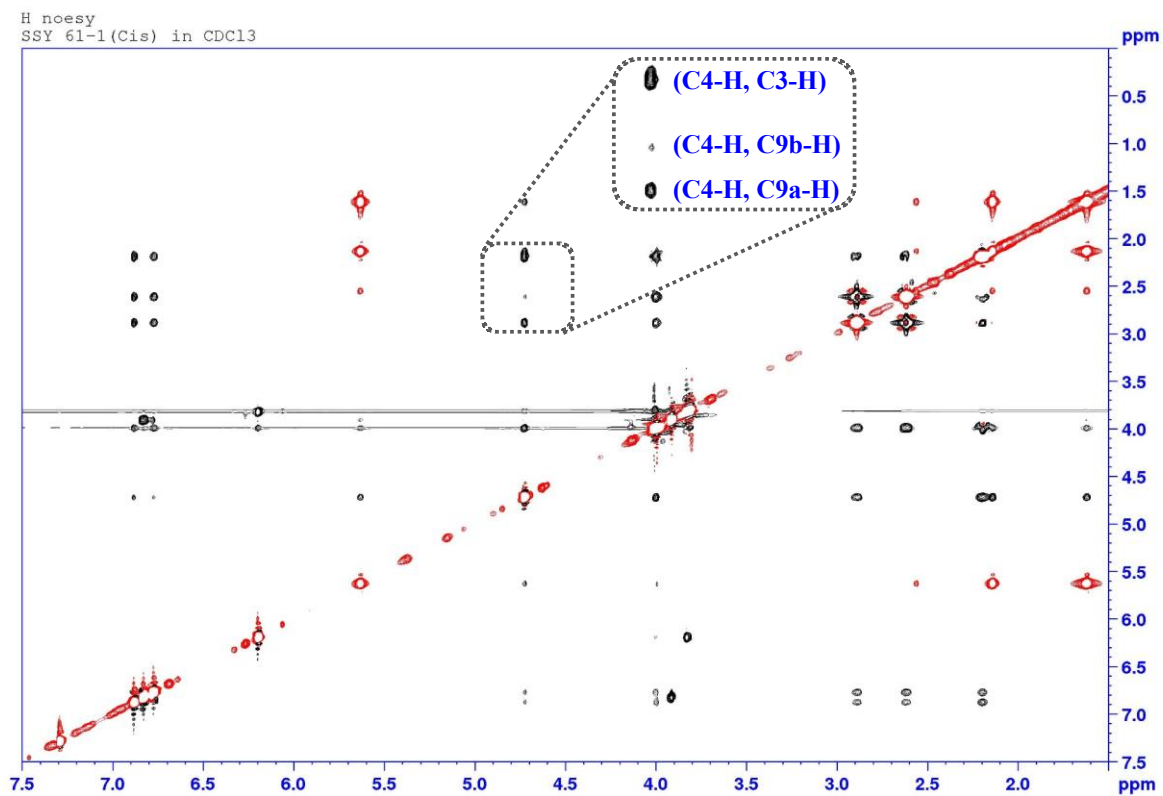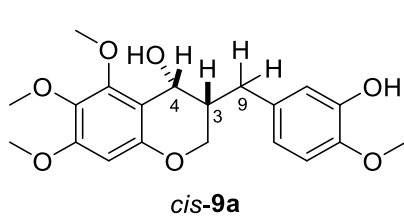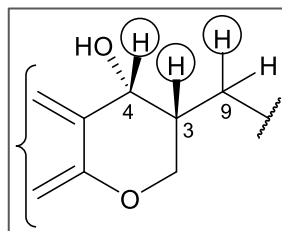

| Annotation | v(F1) [ppm] | v(F2) [ppm] | Intensity [abs] |
|------------|-------------|-------------|-----------------|
| C4-C3      | 4.7132      | 2.193       | 3,456,915       |
| C4-C9a     | 4.7132      | 2.8779      | 1,662,996       |
| C4-C4OH    | 4.7132      | 2.1383      | 1,571,514       |
| C4-C9b     | 4.7132      | 2.6176      | 306,140         |

**Figure S2.** 2D NOESY NMR spectroscopy of *trans-9a*

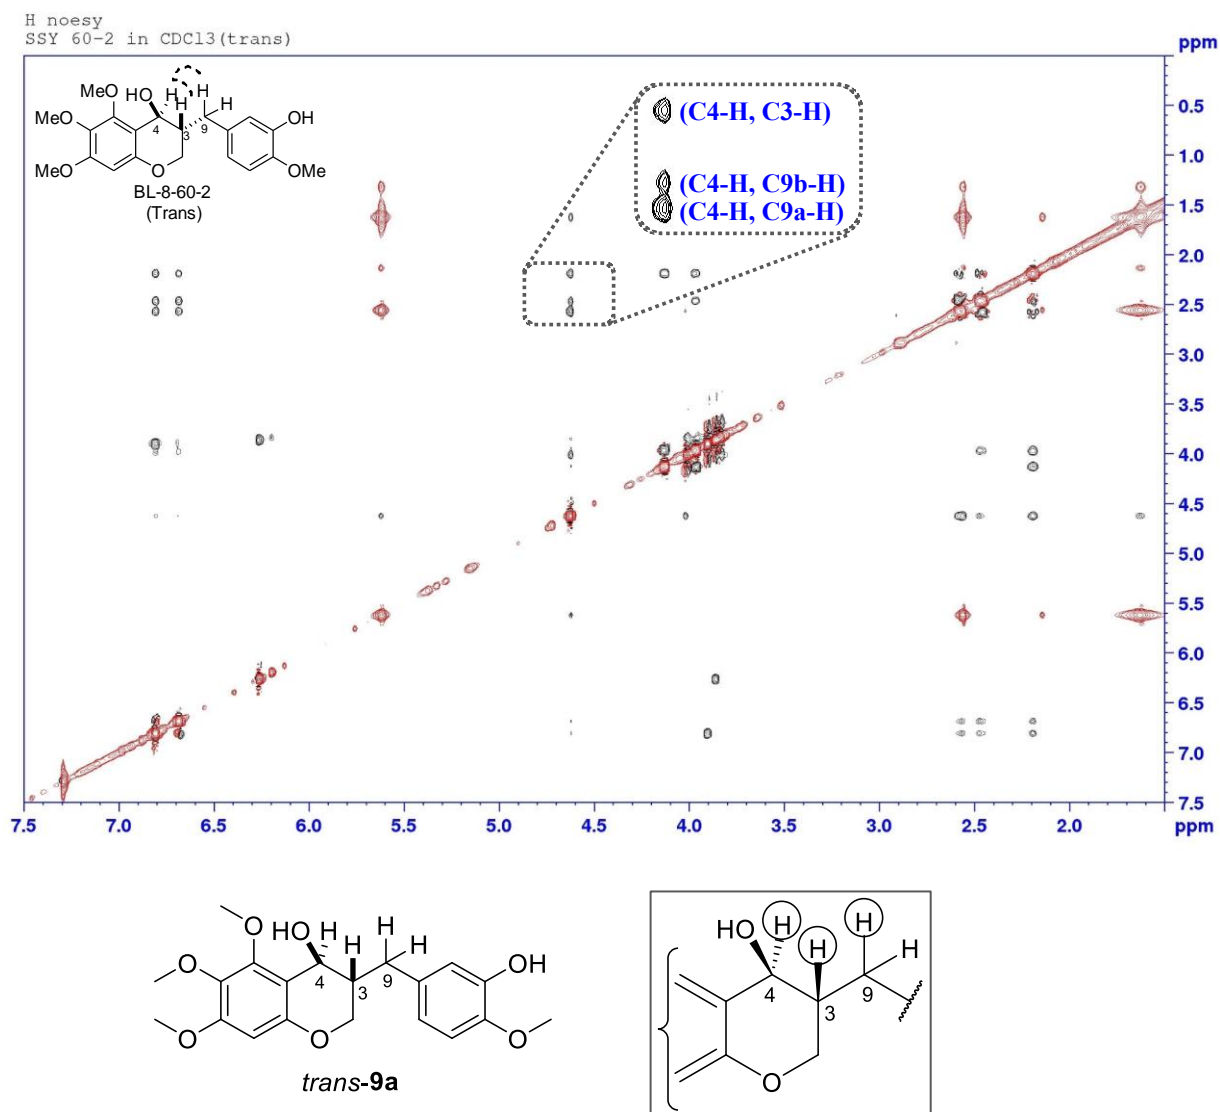

| Annotation | v(F1) [ppm] | v(F2) [ppm] | Intensity [abs] |
|------------|-------------|-------------|-----------------|
| C4-C9a     | 4.5768      | 2.5628      | 4,288,817       |
| C4-C3      | 4.5768      | 2.193       | 2,495,161       |
| C4-C4OH    | 4.5768      | 2.5224      | 2,160,369       |
| C4-C9b     | 4.5768      | 2.467       | 1,260,030       |

### 3. Determination of absolute configuration of (*R,R*)-**9a** and (*S,S*)-**9a** using ECD spectra

#### 1) Geometry optimization and ECD calculation of (*3R,4R*)-**9a**

The computational energy minimization of (*3R,4R*)-**9a** was performed using the DMol3 program in Material Studio 2016. In these calculations, we employed generalized gradient approximation (GGA) in the Perdew-Burke-Ernzerhof (PBE) form as well as a Double numerical plus d-functions (DND) basis set. The ECD calculations were performed with TD-DFT (time-dependent density functional theory) using the B3LYP functional and the 6-31+G(d) basis set via Gaussian 09. The number of excited states per molecule was 30. Solvent effects were taken into account by using the polarizable continuum model (PCM, MeOH). The ECD spectra were generated by the program SpecDis using a Gaussian band shape with 0.16 eV exponential half-width from dipole-length dipolar and rotational strengths.

**Table S1.** Geometry optimization of (*3R,4R*)-**9a**

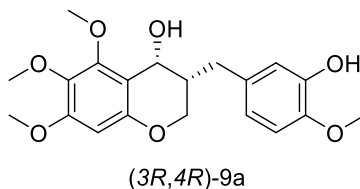

| Atom | X        | Y        | Z        | Atom | X        | Y        | Z        |
|------|----------|----------|----------|------|----------|----------|----------|
| C    | -3.44172 | 1.10762  | 0.084549 | C    | -6.32321 | -0.77938 | 1.331584 |
| C    | -4.22144 | 0.008976 | 0.53464  | H    | -4.26552 | -2.14247 | 0.854097 |
| C    | -3.68106 | -1.27726 | 0.548315 | H    | 0.542259 | 0.153029 | -0.12795 |
| C    | -2.35528 | -1.48841 | 0.142064 | H    | 0.436402 | -1.94366 | 0.976948 |
| C    | -1.52979 | -0.41664 | -0.22275 | H    | -0.21959 | 3.541239 | -0.02238 |
| C    | -2.1026  | 0.872533 | -0.25323 | H    | -0.22281 | 2.162725 | 1.127201 |
| O    | -1.28765 | 1.923135 | -0.66665 | H    | -1.68806 | 3.194886 | 0.959095 |
| O    | -5.50437 | 0.306866 | 0.898404 | H    | -2.97984 | 3.351466 | -1.44204 |

|   |          |          |          |   |          |          |          |
|---|----------|----------|----------|---|----------|----------|----------|
| O | -4.02223 | 2.357794 | 0.105718 | H | -4.59608 | 3.984417 | -0.96623 |
| C | -0.08376 | -0.61961 | -0.60712 | H | -4.46904 | 2.482479 | -1.93717 |
| C | 0.389304 | -1.99585 | -0.12451 | H | -0.84883 | -3.02838 | -1.57625 |
| O | 0.106602 | -0.55171 | -2.03965 | H | -0.36719 | -4.04411 | -0.17876 |
| O | -1.90934 | -2.78541 | 0.203041 | H | 1.745374 | -2.4515  | -1.75058 |
| C | -0.83466 | 2.751943 | 0.425268 | H | 2.031009 | -3.38199 | -0.27211 |
| C | -4.00091 | 3.080115 | -1.13949 | H | 2.844074 | -1.94514 | 1.847392 |
| C | -0.66463 | -3.03362 | -0.48796 | H | 4.574871 | -0.32056 | 2.507365 |
| C | 1.784104 | -2.37761 | -0.65494 | H | 3.138724 | -0.60667 | -2.2329  |
| C | 2.870865 | -1.40744 | -0.24673 | H | 4.674953 | 1.010607 | -2.6126  |
| C | 3.28052  | -1.29587 | 1.085933 | H | 5.39217  | 1.836698 | 2.774409 |
| C | 4.268188 | -0.37663 | 1.463728 | H | 6.993796 | 2.332958 | 2.136685 |
| C | 4.863532 | 0.460081 | 0.516725 | H | 6.686172 | 0.611284 | 2.533656 |
| C | 4.451456 | 0.360973 | -0.83284 | H | -7.28948 | -0.33508 | 1.59353  |
| C | 3.467287 | -0.55851 | -1.19137 | H | -5.89659 | -1.27604 | 2.217632 |

Total energy = -1302.96222064 Ha (1 Ha = 627.509391 kcal/mol)

## 2) Experimental and calculated ECD spectra of (3*R*,4*R*)-**9a** and (3*S*,4*S*)-**9a**

To determine the absolute stereochemistry of (3*R*,4*R*)-**9a**, we compared the experimental ECD spectrum with the calculated ECD spectrum as shown in Figure 3. The calculated ECD spectrum of (3*R*,4*R*)-**9a** showed good agreement with the experimental spectrum of (3*R*,4*R*)-**9a** in methanol (1.0 mg/mL). And the calculated ECD spectrum of (3*S*,4*S*)-**9a** matched with the experimental spectrum of (3*S*,4*S*)-**9a** too.

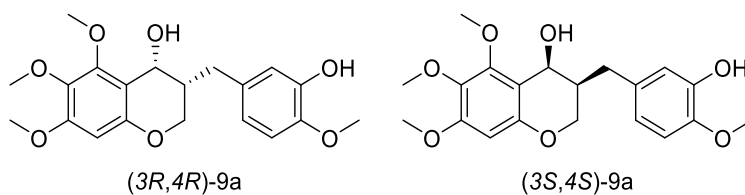

#### 4. Matched/mismatched effects on homoisoflavanones ((*R*)-**2** and (*S*)-**2**) in asymmetric transfer hydrogenation using catalysts (*R,R*)-**4** and (*S,S*)-**4**

To investigate the homoisoflavanone dynamic kinetic resolution (DKR) we prepared (*S*)-**2** and (*R*)-**2** via HPLC (Chiralpak AD-3 column; inject: 0.3  $\mu$ L; methanol : acetonitrile=50 : 50; flow rate: 1.0 mL/min; 35°C). DBU/formic acid (3:1 (v/v)) were dissolved in acetonitrile. The solution was sparged with nitrogen for 15 min, then warmed to 40 °C. Separately, (*S*)-**2** or (*R*)-**2** (10 mg, 0.027 mmol) and RuCl(*p*-cymene)[(*R,R*)-Ts-DPEN] or RuCl(*p*-cymene)[(*S,S*)-Ts-DPEN] (30 mol%) were dissolved in acetonitrile, then added to the DBU/formic acid mixture as shown in Figure 4 and Figures S3 and S4. The mixture was stirred at 50 °C (3 h, 6 h, 12 h, 24 h and 48 h). Match (the chiral centers of the compound and Ru catalyst are the same) and mismatch (the chiral center of the compound and Ru catalyst are not the same) mixtures were measured by chiral HPLC.

**Table S2.** Time-course data for asymmetric transfer hydrogenation of (*R*)-**2** and (*S*)-**2**.

|                            | catalyst                   | time(h)               |          |          |      |     |    |       |          |      |
|----------------------------|----------------------------|-----------------------|----------|----------|------|-----|----|-------|----------|------|
|                            |                            |                       | Ratio(%) | Ratio(%) |      |     |    | %ee   | cistrans |      |
| <br>( <i>R</i> )- <b>8</b> | <br>( <i>R,R</i> )-Ru      | Ratio(%)              |          |          |      |     |    |       |          |      |
|                            |                            | 0                     | 100      | 0        | 0    | 0   |    |       |          |      |
|                            |                            | 6                     | 7        | 0.1      | 72   | 2   | 19 | 97.3  | 3.9:1    |      |
|                            |                            | 12                    | 8        | 4        | 77   | 7   | 4  | 92    | 21:1     |      |
|                            |                            | 24                    | 6        | 1        | 83   | 8   | 2  | 91.2  | 46:1     |      |
|                            |                            | Ratio(%)              |          |          |      |     |    |       |          |      |
|                            |                            | 0                     | 100      | 0        | 0    | 0   | 0  |       |          |      |
|                            |                            | 3                     | 71       | 12       | 1    | 15  | 1  | 93.8  | 16:1     |      |
|                            | 6                          | 46                    | 18       | 1        | 32   | 3   | 97 | 11:1  |          |      |
|                            | 12                         | 16                    | 11       | 2        | 64.5 | 6.5 | 97 | 10:1  |          |      |
|                            | 24                         | 4                     | 6        | 2        | 80   | 8   | 98 | 10:1  |          |      |
|                            | <br>( <i>S</i> )- <b>8</b> | <br>( <i>S,S</i> )-Ru | Ratio(%) |          |      |     |    |       |          |      |
|                            |                            |                       | 0        | 0        | 100  | 0   | 0  | 0     |          |      |
|                            |                            |                       | 6        | 11       | 12   | 0.1 | 74 | 3     | 99.9     | 25:1 |
| 12                         |                            |                       | 8        | 11       | 0.1  | 76  | 5  | 99.9  | 15:1     |      |
| 24                         |                            |                       | 2        | 2        | 0.1  | 89  | 7  | 99.9  | 13:1     |      |
| Ratio(%)                   |                            |                       |          |          |      |     |    |       |          |      |
| 0                          |                            |                       | 0        | 100      | 0    | 0   | 0  |       |          |      |
| 3                          |                            |                       | 10       | 74       | 6    | 4   | 6  | 60    | 1.7:1    |      |
| 6                          |                            | 20                    | 51       | 20       | 4    | 5   | 83 | 4.8:1 |          |      |
| 12                         |                            | 17                    | 13       | 56       | 6    | 8   | 90 | 7.8:1 |          |      |
| 24                         |                            | 14                    | 11       | 59       | 6    | 10  | 91 | 6.5:1 |          |      |

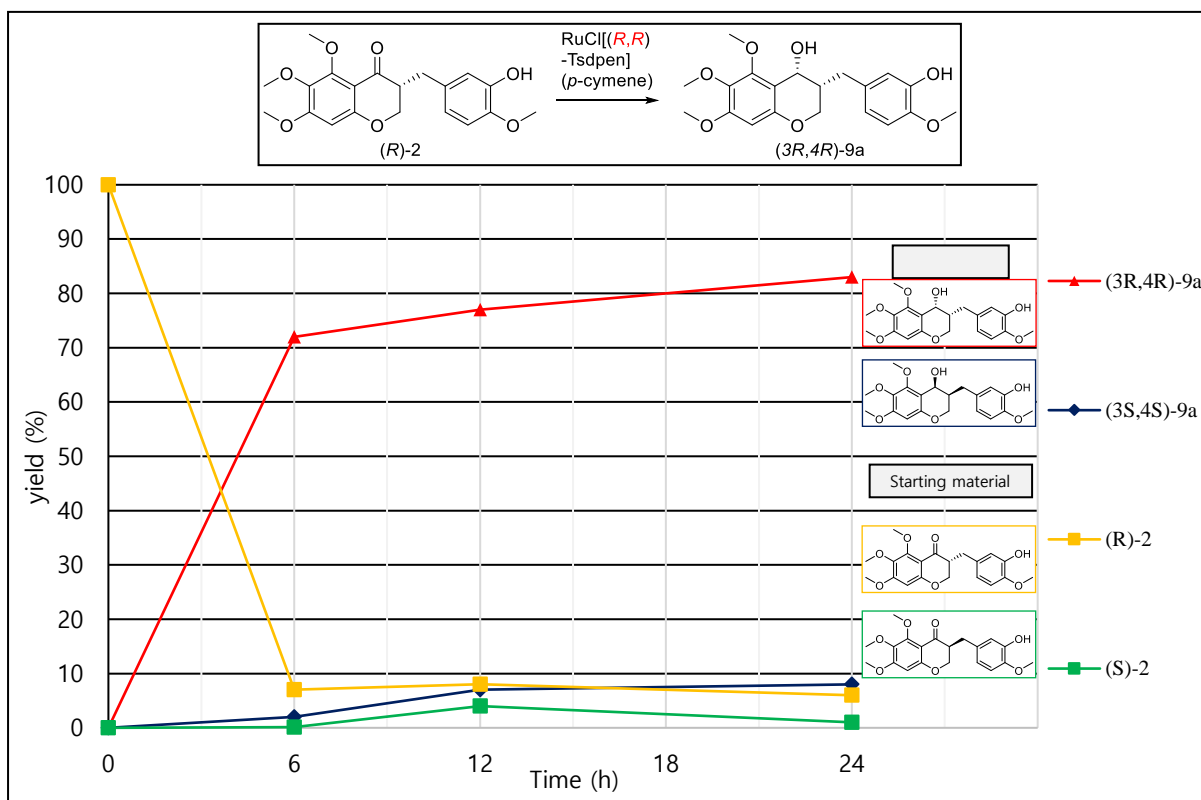

**Figure S3.** Time-course data for asymmetric transfer hydrogenation of (*R*)-2 with (*R,R*)-4.

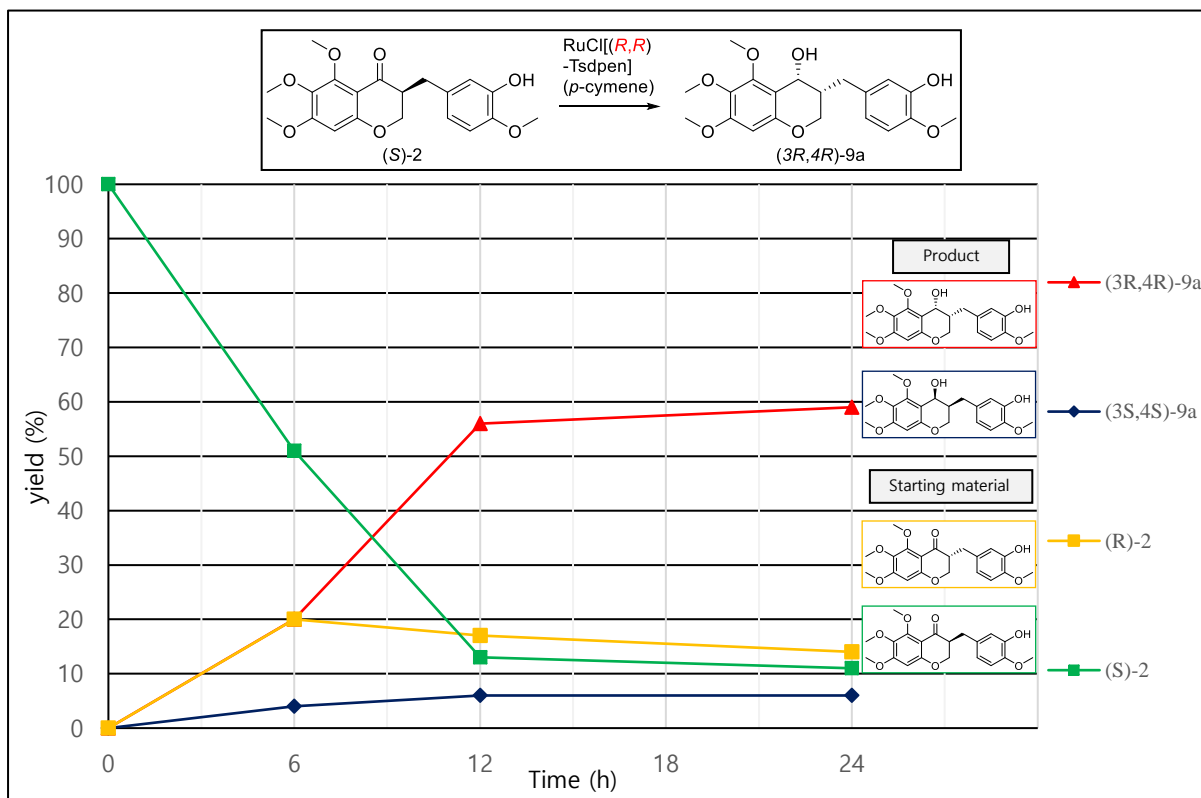

**Figure S4.** Time-course data for asymmetric transfer hydrogenation of (*S*)-2 with (*R,R*)-4.



## 5. Effect of homoisoflavonoids on tubulin polymerization

The trimethoxyphenyl group in our homoisoflavonoids bears some resemblance to the tubulin polymerization inhibitor combretastatin A4. To assess whether these compounds act by the same mechanism as combretastatin A4, we performed a tubulin polymerization assay.

Compounds were tested for effect on tubulin polymerization using a commercially available fluorometric kit (BK011P, Cytoskeleton, Inc., Denver, CO). Compounds were diluted in DMSO and then water so that final DMSO concentration in the assay was 0.001%. A mix of GTP and tubulin was prepared in a glycerol containing buffer per kit protocol and added to the compounds to a final volume of 30  $\mu$ L in a black 384-well plate. Tubulin polymerization was observed by reading fluorescence (ex. 360 nm, em. 420 nm) over 90 minutes in a Synergy H1 plate reader (Biotek, Winooski, VT). Combretastatin A4, a potent inhibitor of tubulin polymerization, was included in the assay as a positive control. For quantitative analysis, total tubulin polymerization was calculated by subtracting the fluorescence at  $t=60$  min from  $t=0$  and normalized to this value for the control assay (DMSO alone). GraphPad Prism software (v.7.0) was used for data analysis.

None of our compounds had inhibition of tubulin polymerization comparable to combretastatin A4 (Figures S5, S6). Only compound (*S*)-**2** showed very modest (25%) inhibition at 1  $\mu$ M, suggesting that tubulin polymerization inhibition is not the major mechanism of antiangiogenic action of these novel compounds.

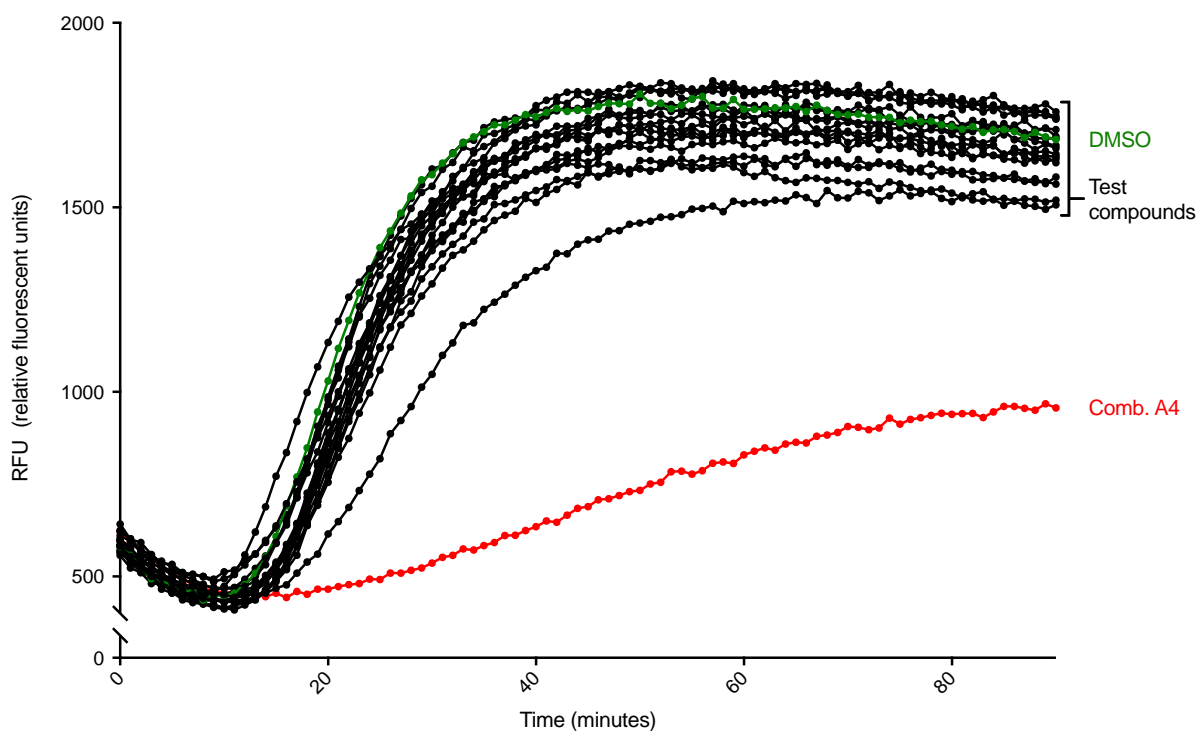

**Figure S5.** Kinetic traces of tubulin polymerization assay. Assay fluorescence plotted as a function of time. Test compounds in black, DMSO vehicle control in green, known tubulin polymerization inhibitor combretastatin A4 (Comb. A4) in red. All compounds were tested at 1  $\mu$ M. Mean of duplicate wells indicated.

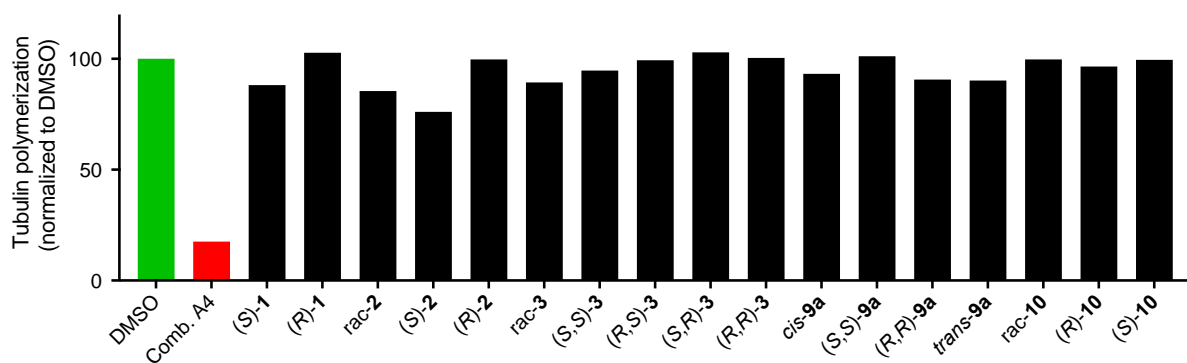

**Figure S6.** Summary of tubulin polymerization effects of tested compounds. Change in assay fluorescence at  $t=60$  minutes plotted, normalized to vehicle control (green) and compared to known tubulin polymerization inhibitor combretastatin A4 (Comb. A4; red). All compounds were tested at 1  $\mu$ M. Mean of duplicate wells indicated.

## 6. Copies of $^1\text{H}$ and $^{13}\text{C}\{^1\text{H}\}$ NMR spectra

### 7-Hydroxy-3-(3-hydroxy-4-methoxybenzyl)-5,6-dimethoxychroman-4-one (6)

$^1\text{H}$  NMR (600 MHz,  $\text{CDCl}_3$ )

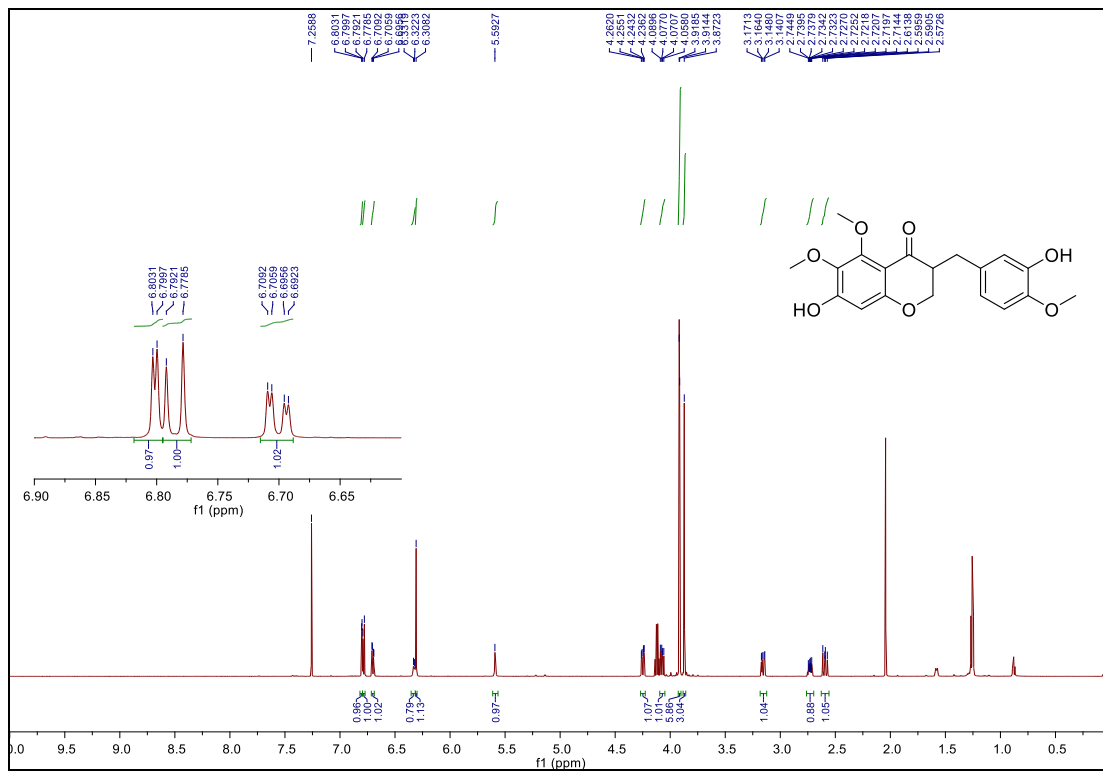

$^{13}\text{C}\{^1\text{H}\}$  NMR (150 MHz,  $\text{CDCl}_3$ )

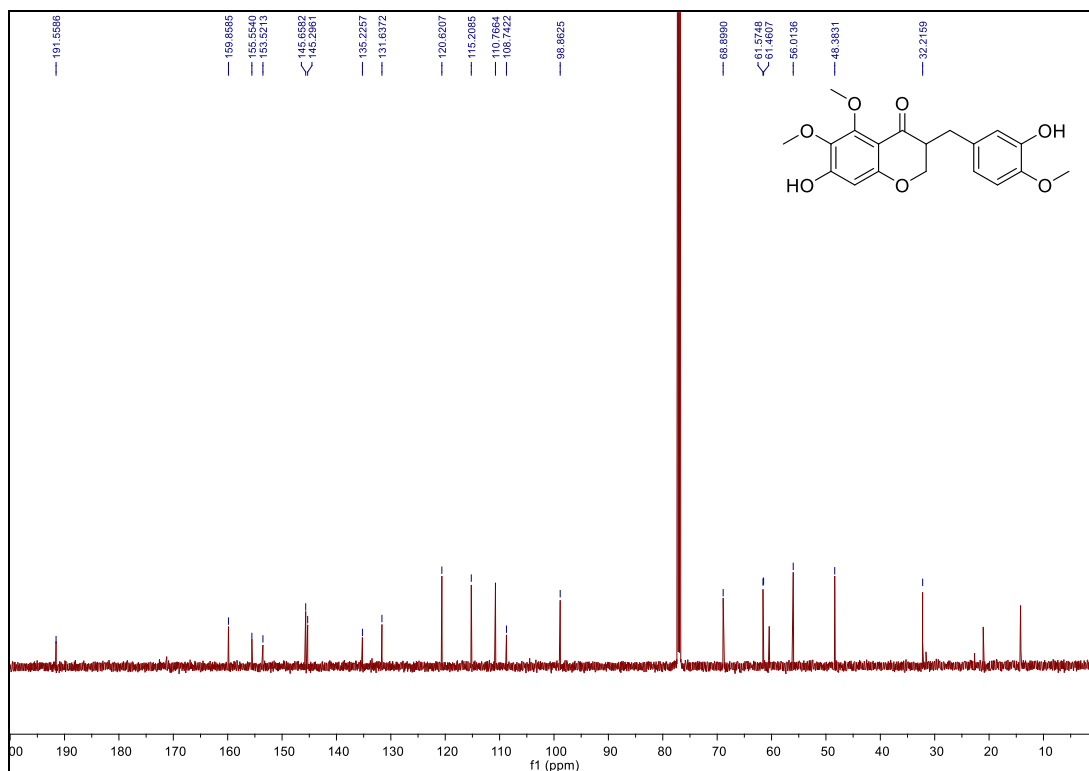

### 3-(3-(benzyloxy)-4-methoxybenzyl)-5,6,7-trimethoxychroman-4-one (7)

$^1\text{H}$  NMR (600 MHz,  $\text{CDCl}_3$ )

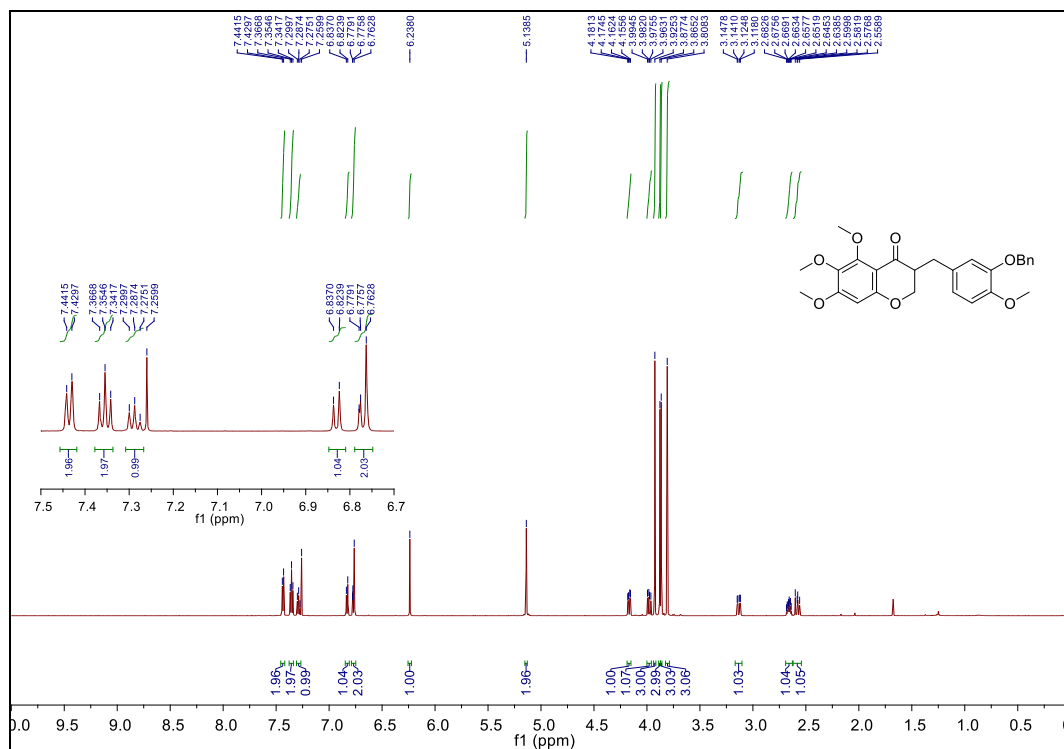

**(E)-3-(3-hydroxy-4-methoxybenzylidene)-5,6,7-trimethoxychroman-4-one**

<sup>1</sup>H NMR (600 MHz, CDCl<sub>3</sub>)

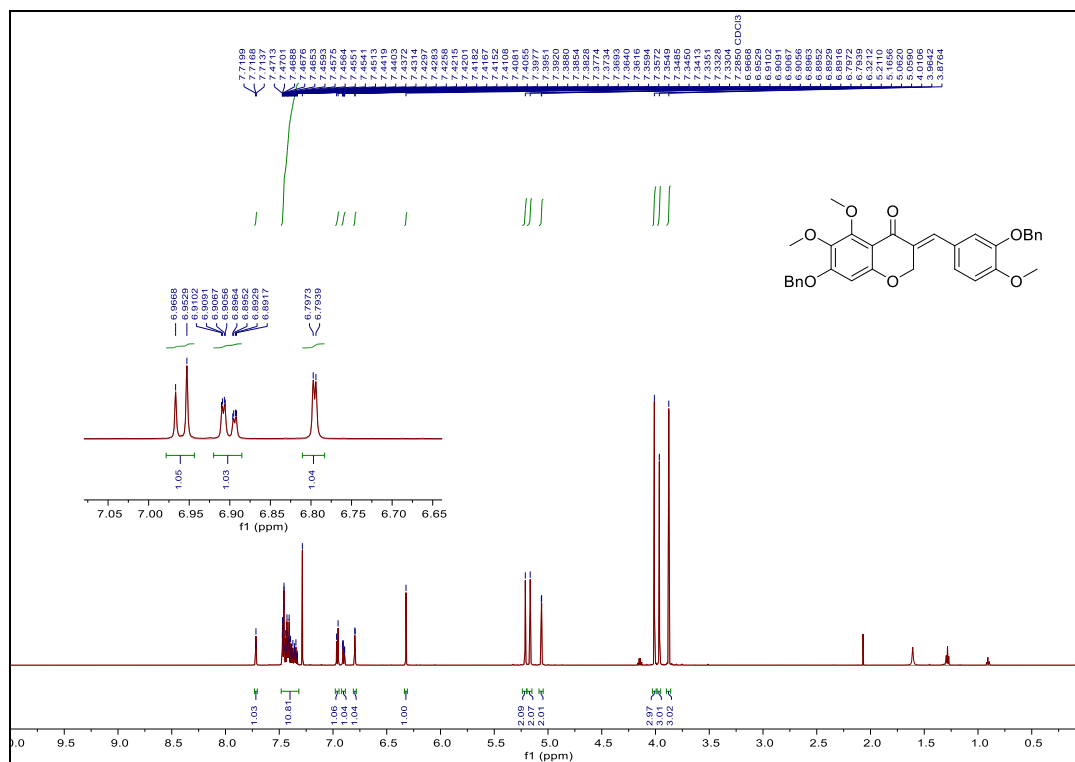

<sup>13</sup>C{<sup>1</sup>H} NMR (150 MHz, CDCl<sub>3</sub>)

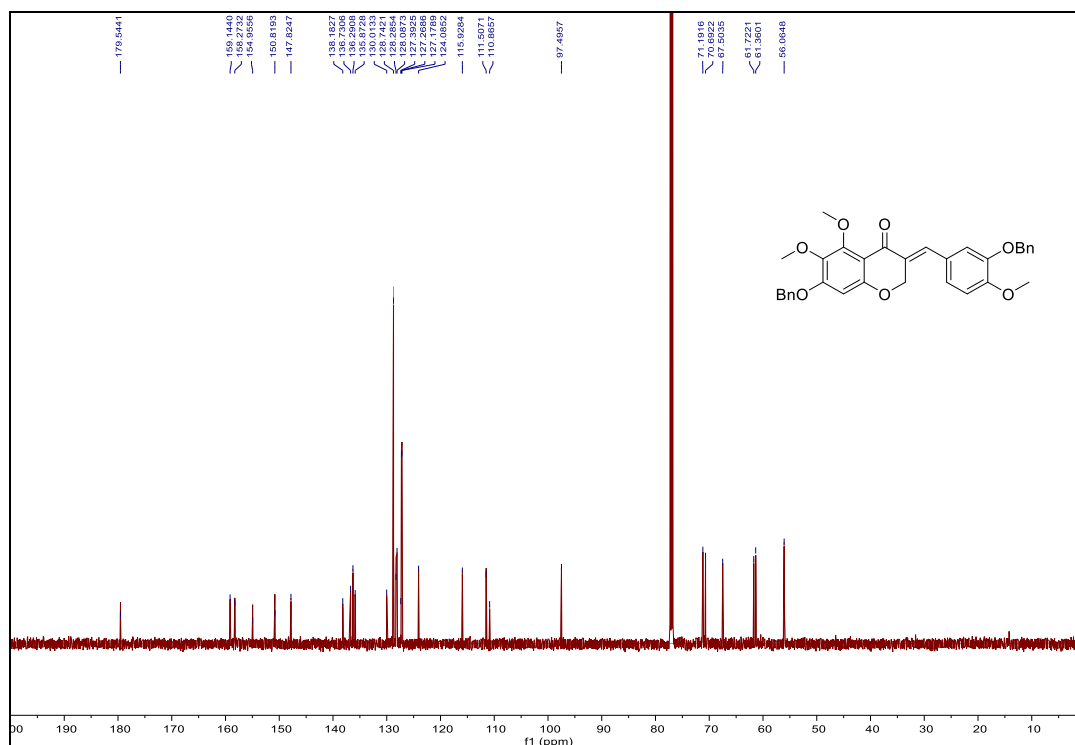

# 7-(Benzyloxy)-3-(3-(benzyloxy)-4-methoxybenzyl)-5,6-dimethoxychroman-4-one (8)

$^1\text{H}$  NMR (600 MHz,  $\text{CDCl}_3$ )

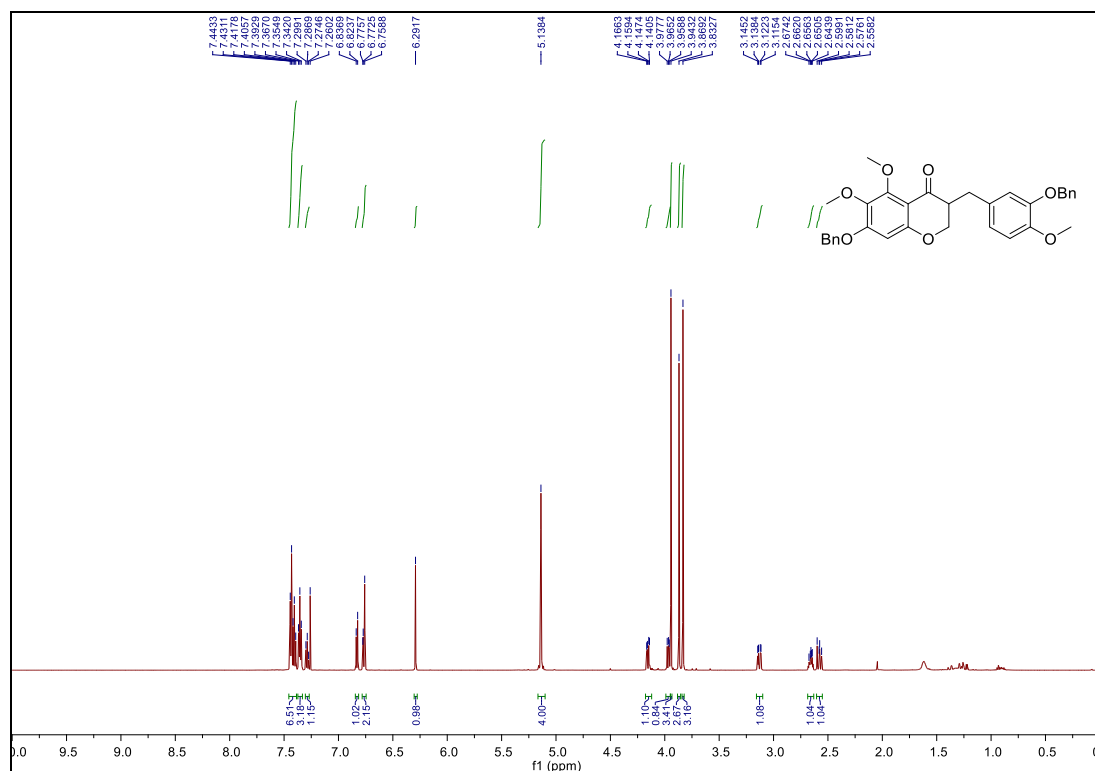

$^{13}\text{C}\{^1\text{H}\}$  NMR (150 MHz,  $\text{CDCl}_3$ )

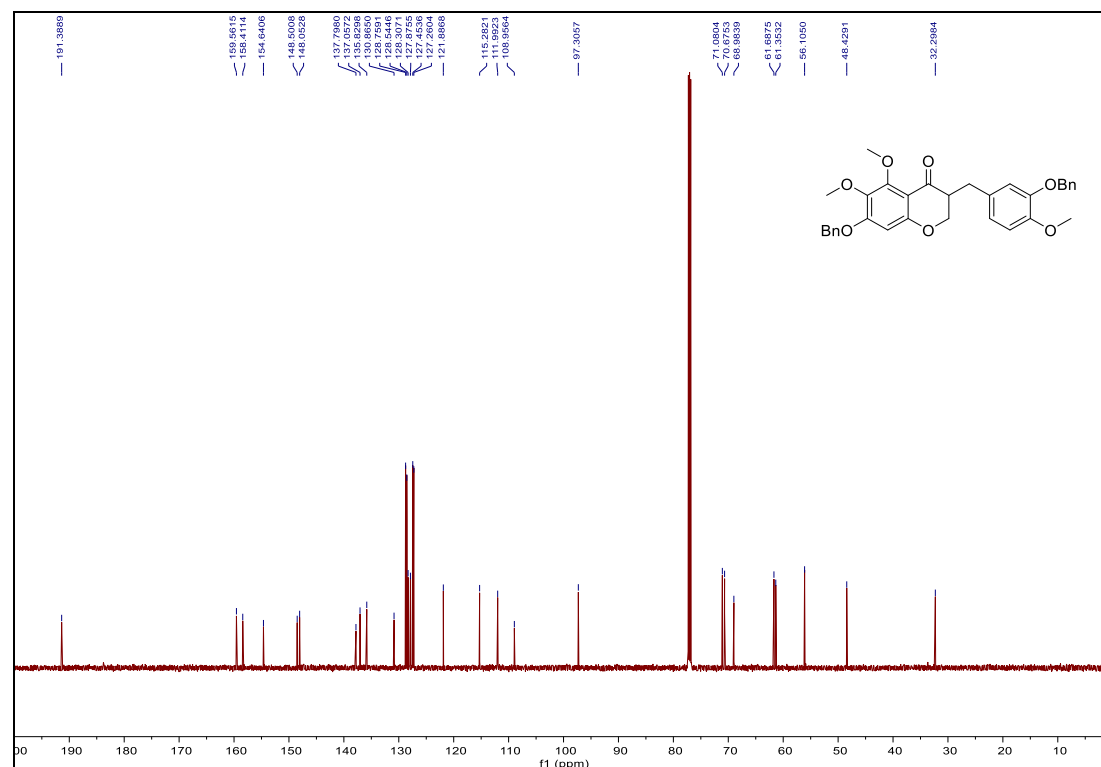

***trans*-3-(3-hydroxy-4-methoxybenzyl)-5,6,7-trimethoxychroman-4-ol (*trans*-9a)**

$^1\text{H}$  NMR (600 MHz,  $\text{CDCl}_3$ )

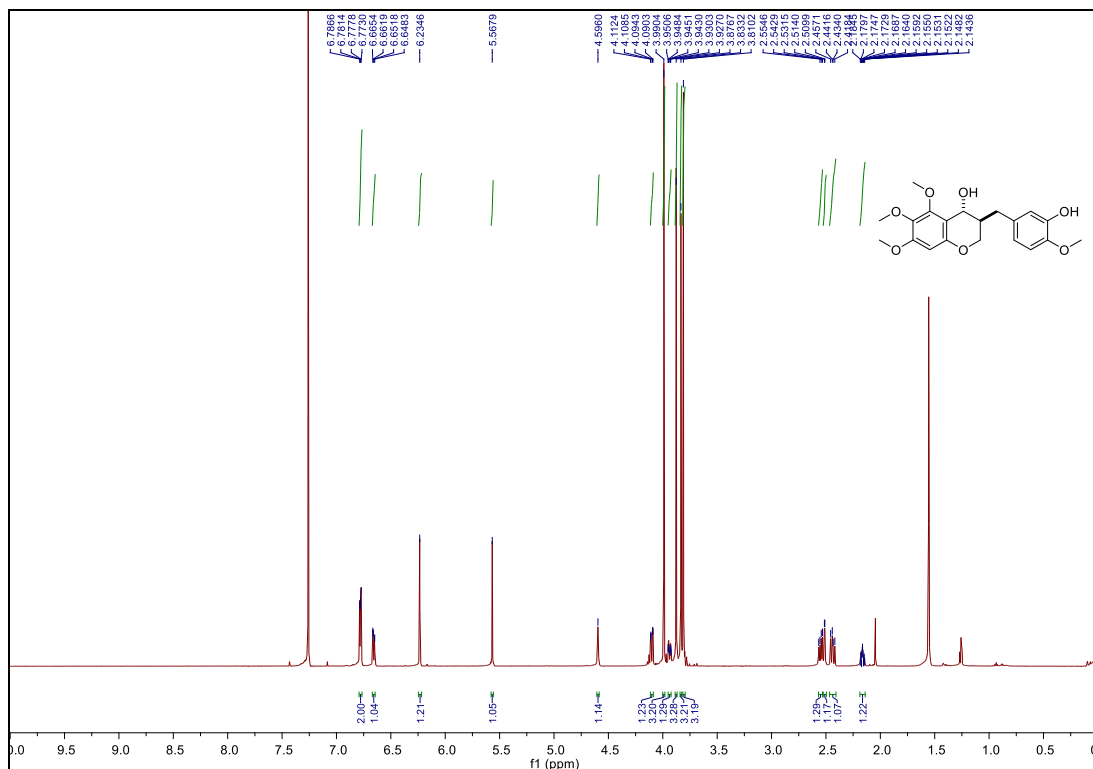

$^{13}\text{C}\{^1\text{H}\}$  NMR (150 MHz,  $\text{CD}_3\text{OD}$ )

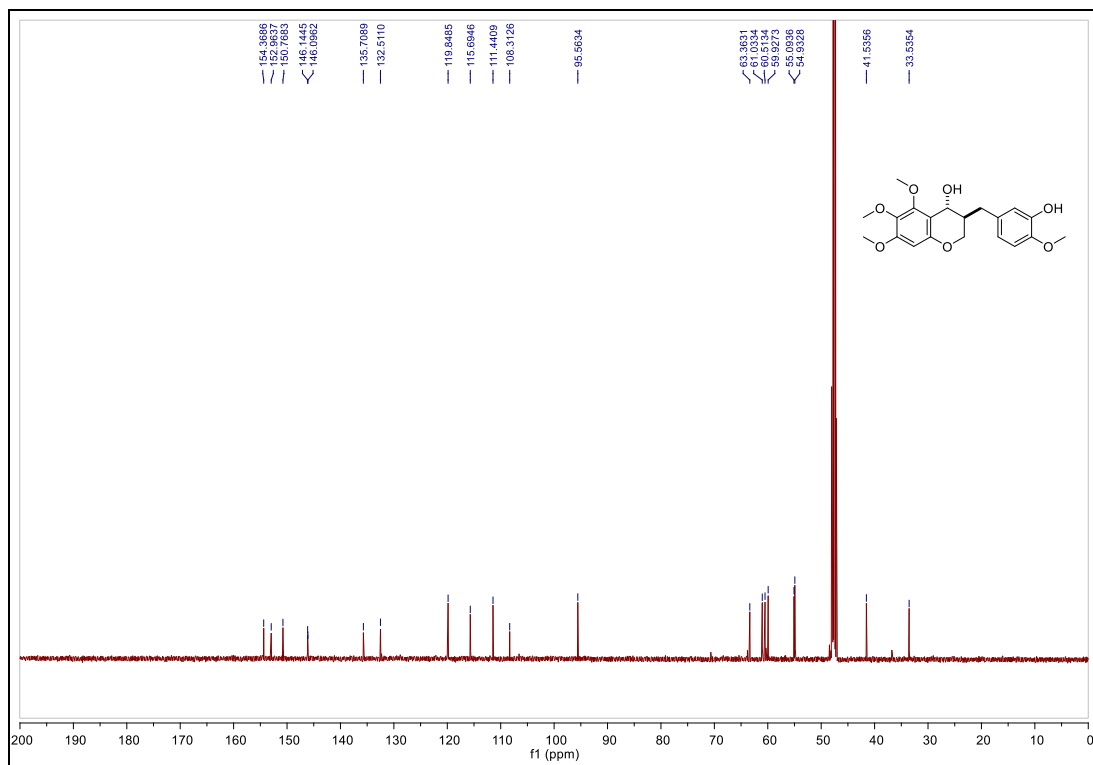

**(3*R*,4*R*)-3-(3-hydroxy-4-methoxybenzyl)-5,6,7-trimethoxychroman-4-ol ((3*R*,4*R*)-9a)**

<sup>1</sup>H NMR (600 MHz, CDCl<sub>3</sub>)

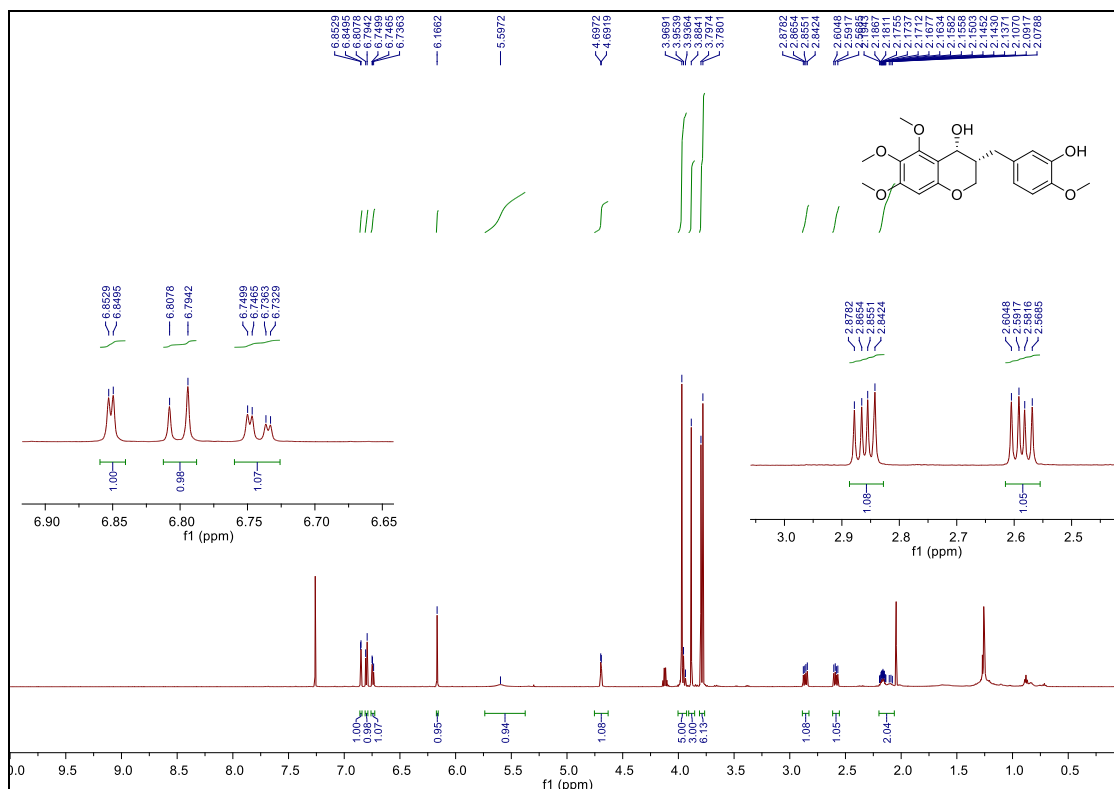

<sup>13</sup>C{<sup>1</sup>H} NMR (150 MHz, CDCl<sub>3</sub>)

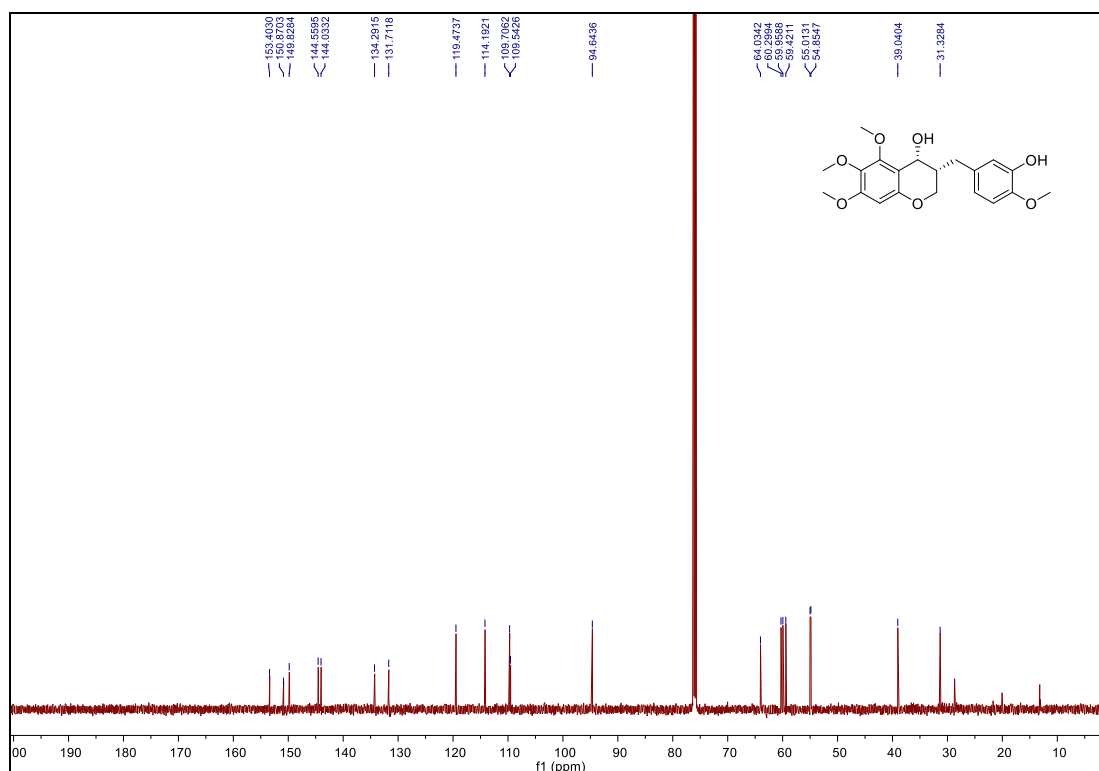



**(3*S*,4*S*)-3-(3-hydroxy-4-methoxybenzyl)-5,6-dimethoxychromane-4,7-diol ((3*S*,4*S*)-9a)**

<sup>1</sup>H NMR (600 MHz, CDCl<sub>3</sub>)

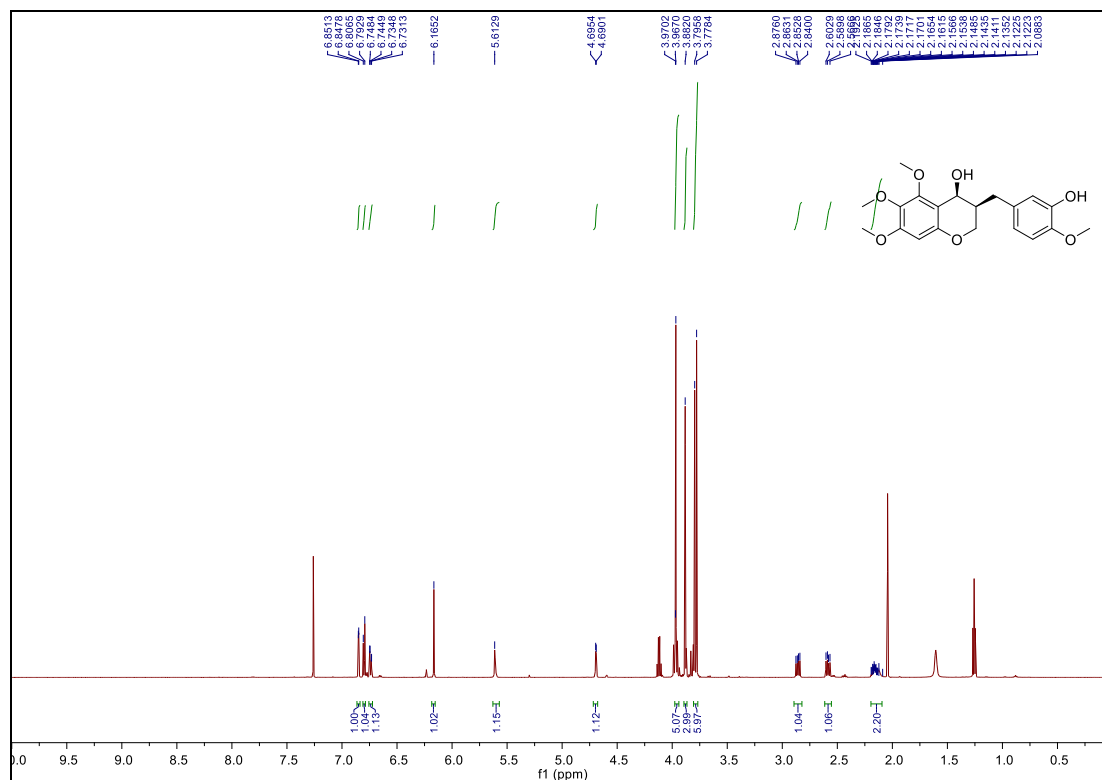

<sup>13</sup>C{<sup>1</sup>H} NMR (150 MHz, CDCl<sub>3</sub>)

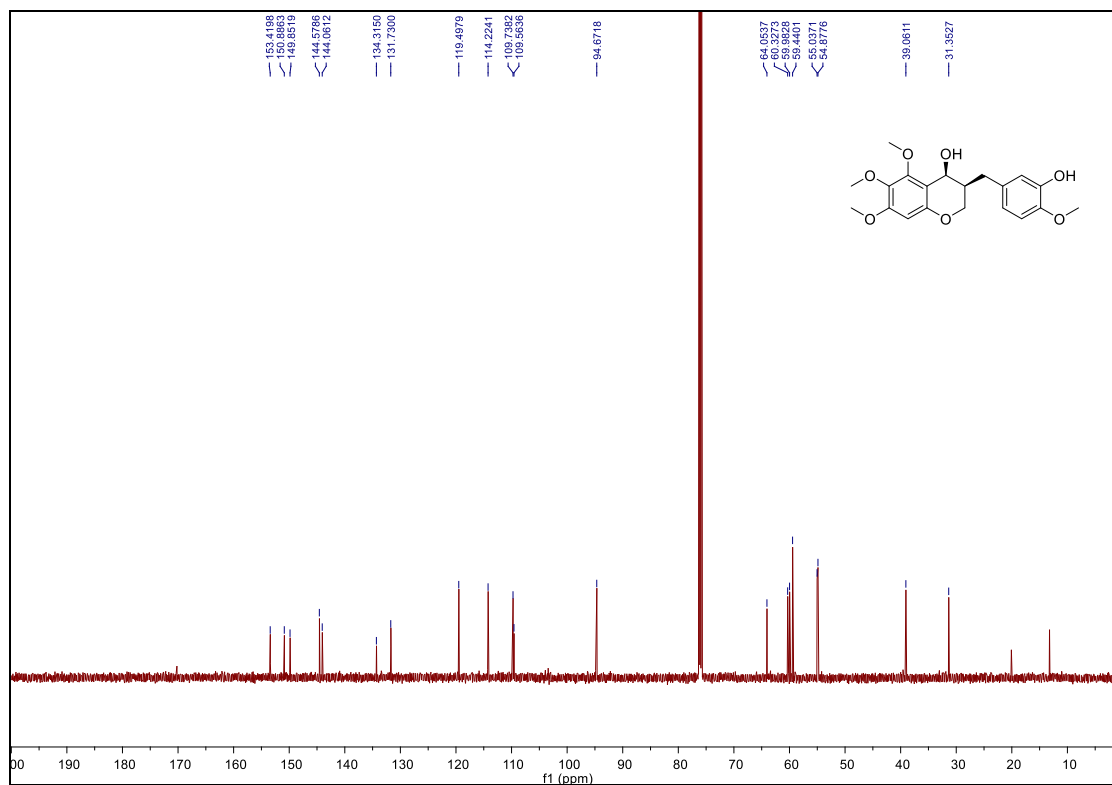

**(3*R*,4*R*)-3-(3-(benzyloxy)-4-methoxybenzyl)-5,6,7-trimethoxychroman-4-ol ((3*R*,4*R*)-9c)**

<sup>1</sup>H NMR (600 MHz, CDCl<sub>3</sub>)

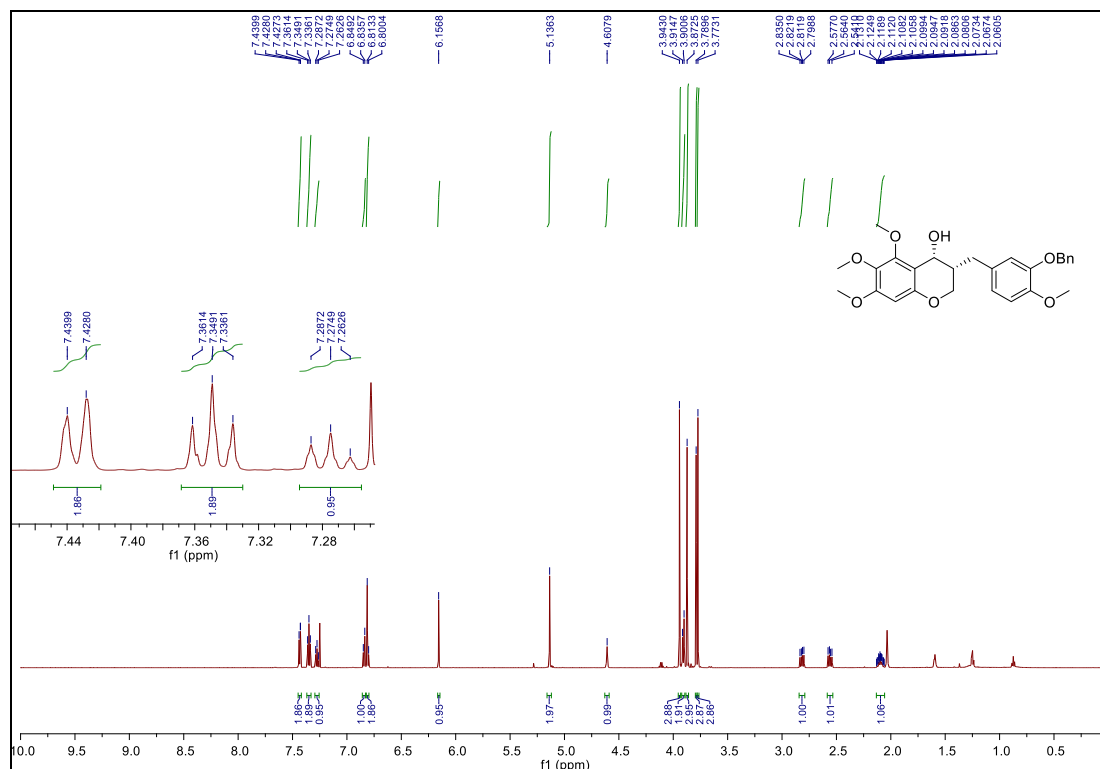

<sup>13</sup>C{<sup>1</sup>H} NMR (150 MHz, CDCl<sub>3</sub>)

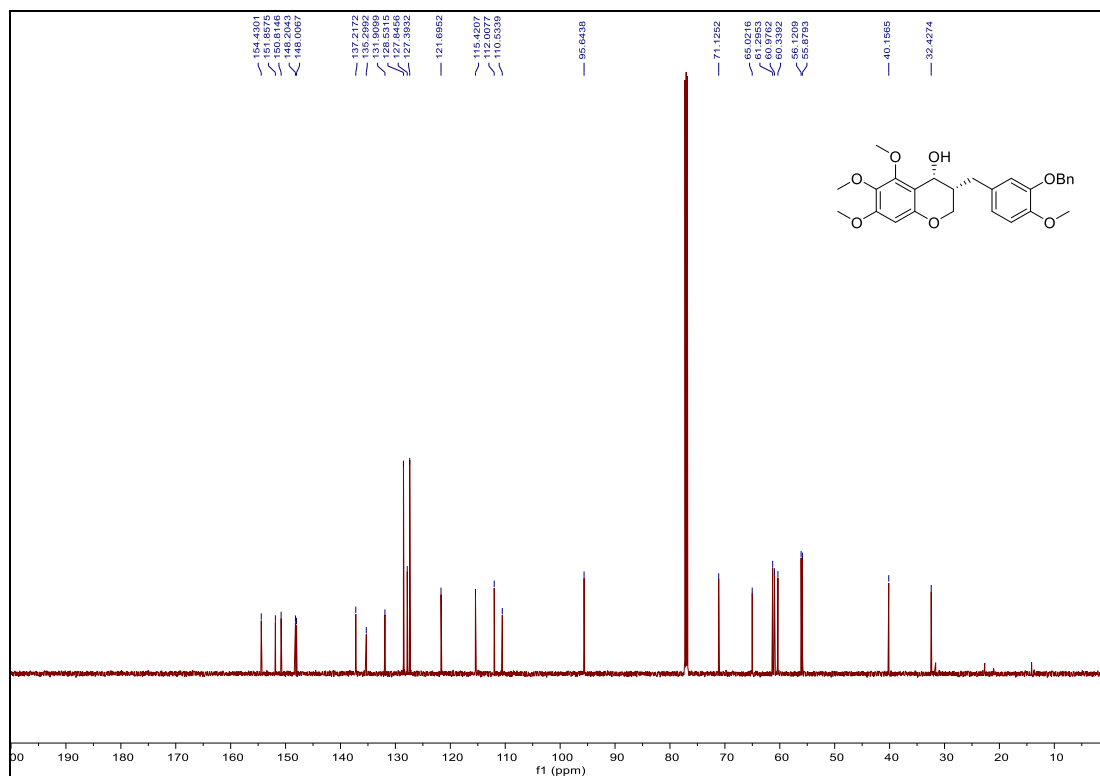

(3*S*,4*S*)-3-(3-(benzyloxy)-4-methoxybenzyl)-5,6,7-trimethoxychroman-4-ol ((3*S*, 4*S*)-9c)

<sup>1</sup>H NMR (600 MHz, CDCl<sub>3</sub>)

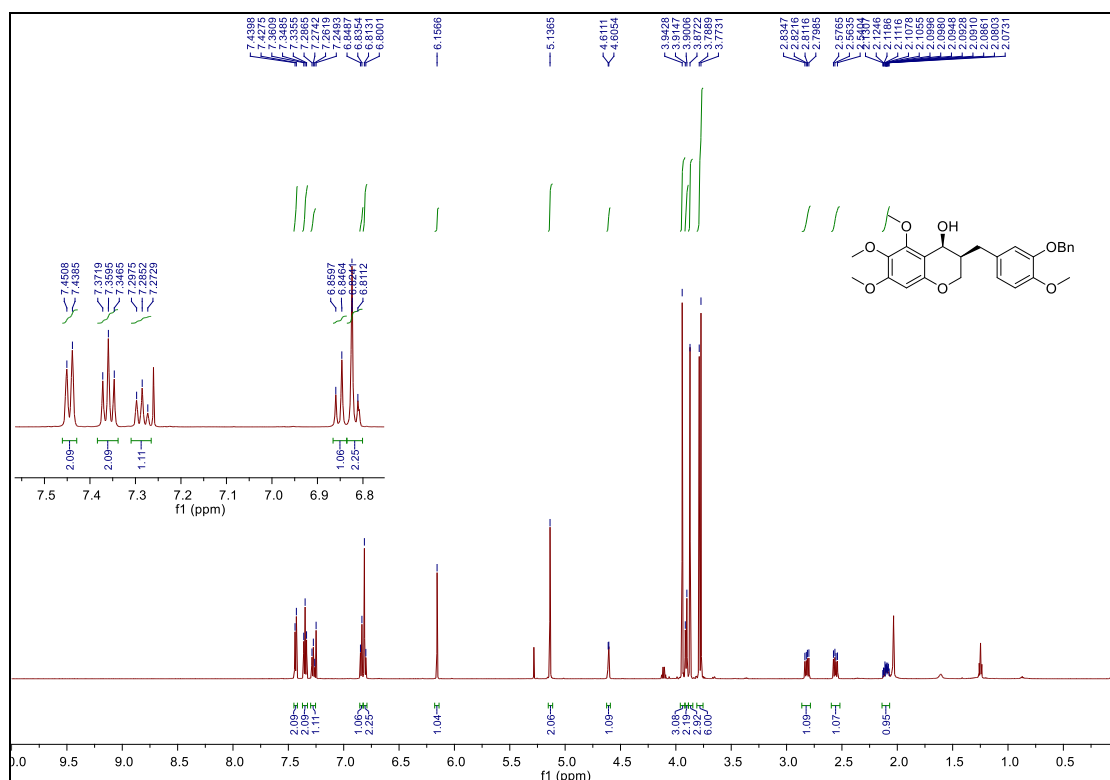

<sup>13</sup>C{<sup>1</sup>H} NMR (150 MHz, CDCl<sub>3</sub>)

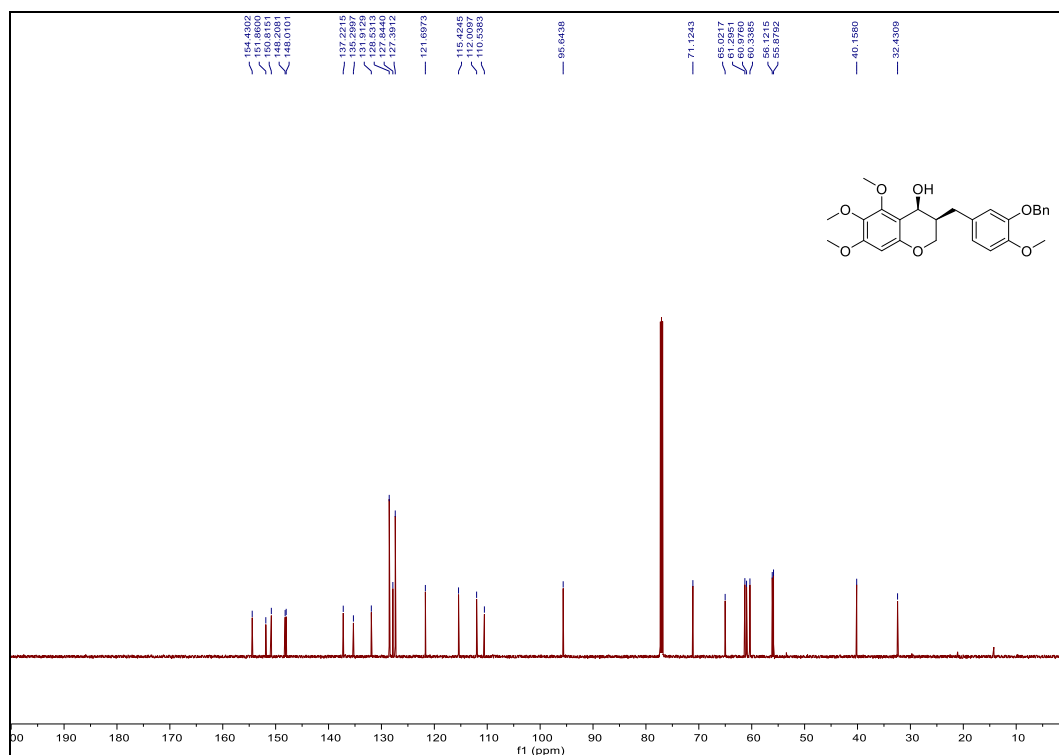

**(3*R*,4*R*)-7-(benzyloxy)-3-(3-(benzyloxy)-4-methoxybenzyl)-5,6-dimethoxychroman-4-ol ((3*R*,4*R*)-**9d**)**

<sup>1</sup>H NMR (600 MHz, CDCl<sub>3</sub>)

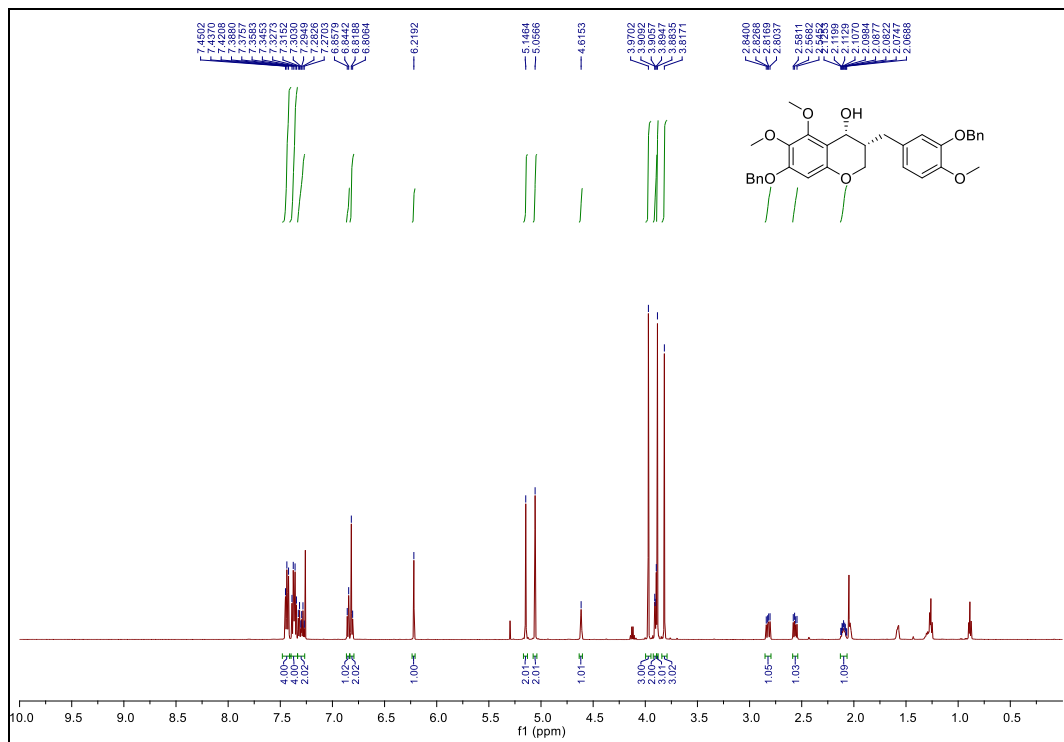

<sup>13</sup>C{<sup>1</sup>H} NMR (150 MHz, CDCl<sub>3</sub>)

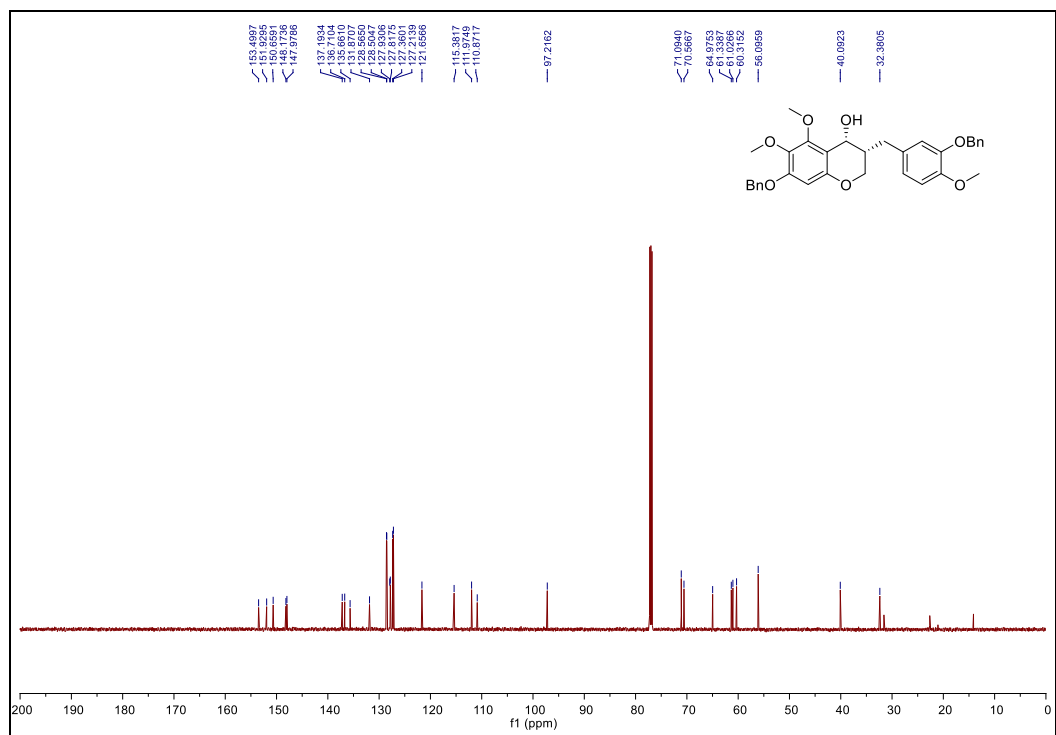

**(3*S*,4*S*)-7-(benzyloxy)-3-(3-(benzyloxy)-4-methoxybenzyl)-5,6-dimethoxychroman-4-ol ((3*S*,4*S*)-**9d**)**

$^1\text{H}$  NMR (600 MHz,  $\text{CDCl}_3$ )

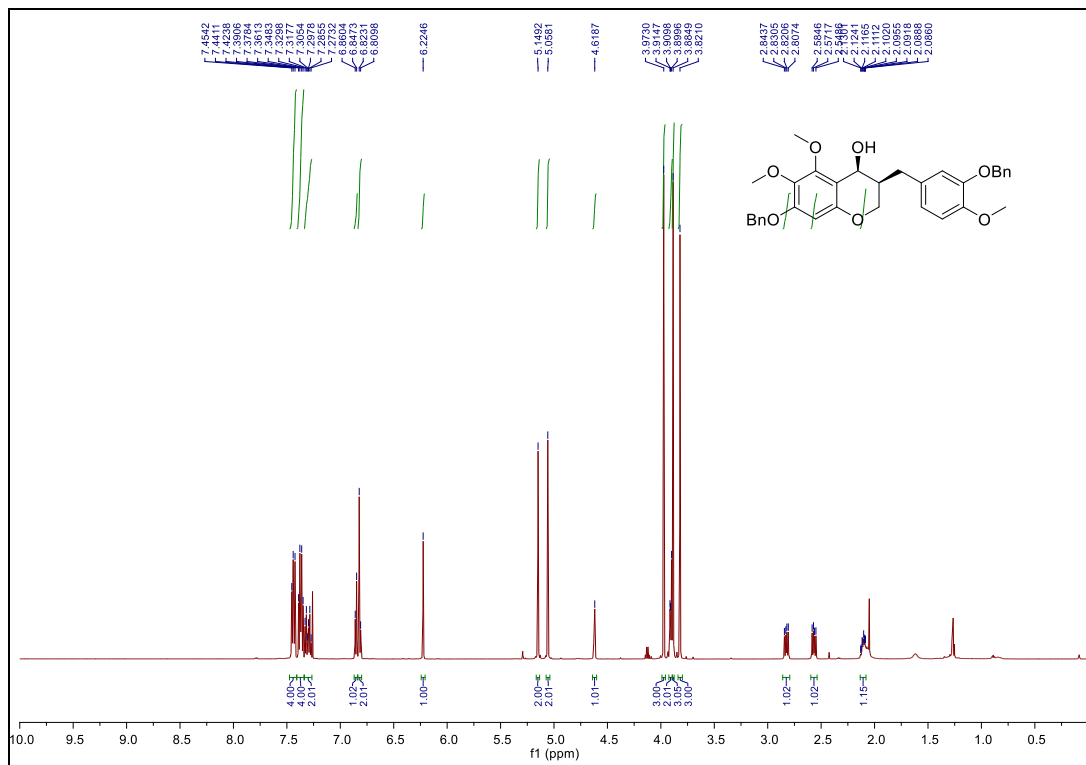

$^{13}\text{C}\{^1\text{H}\}$  NMR (150 MHz,  $\text{CDCl}_3$ )

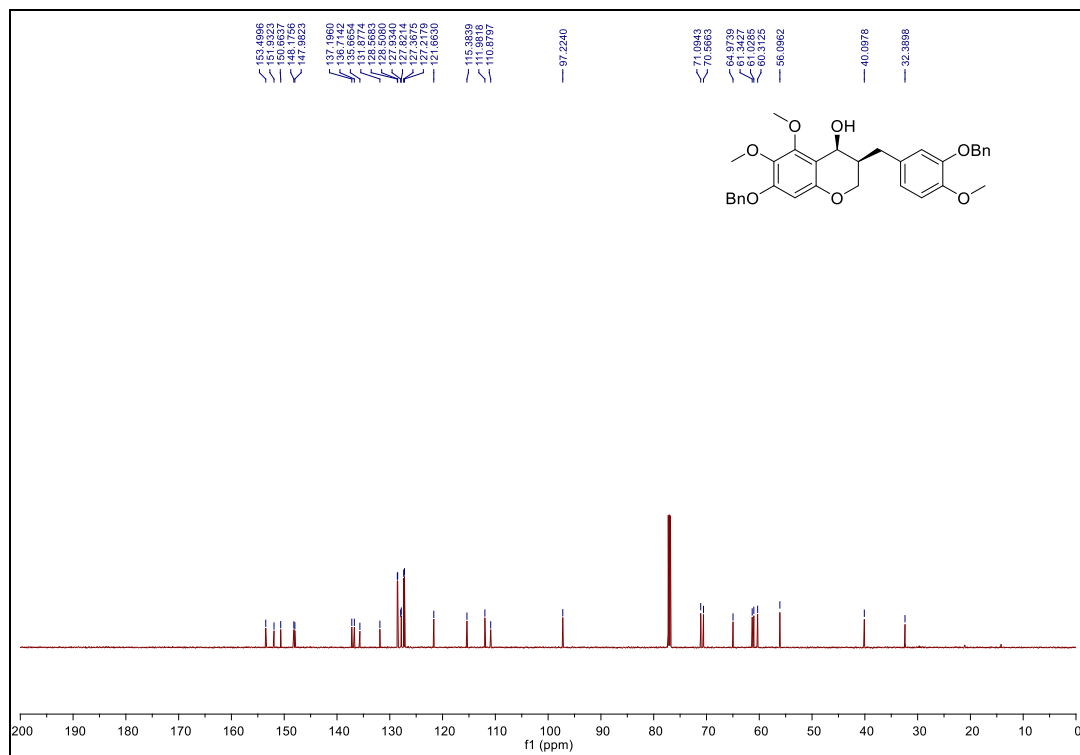

**(R)-3-(3-(benzyloxy)-4-methoxybenzyl)-5,6,7-trimethoxychroman-4-one ((R)-7)**

<sup>1</sup>H NMR (600 MHz, CDCl<sub>3</sub>)

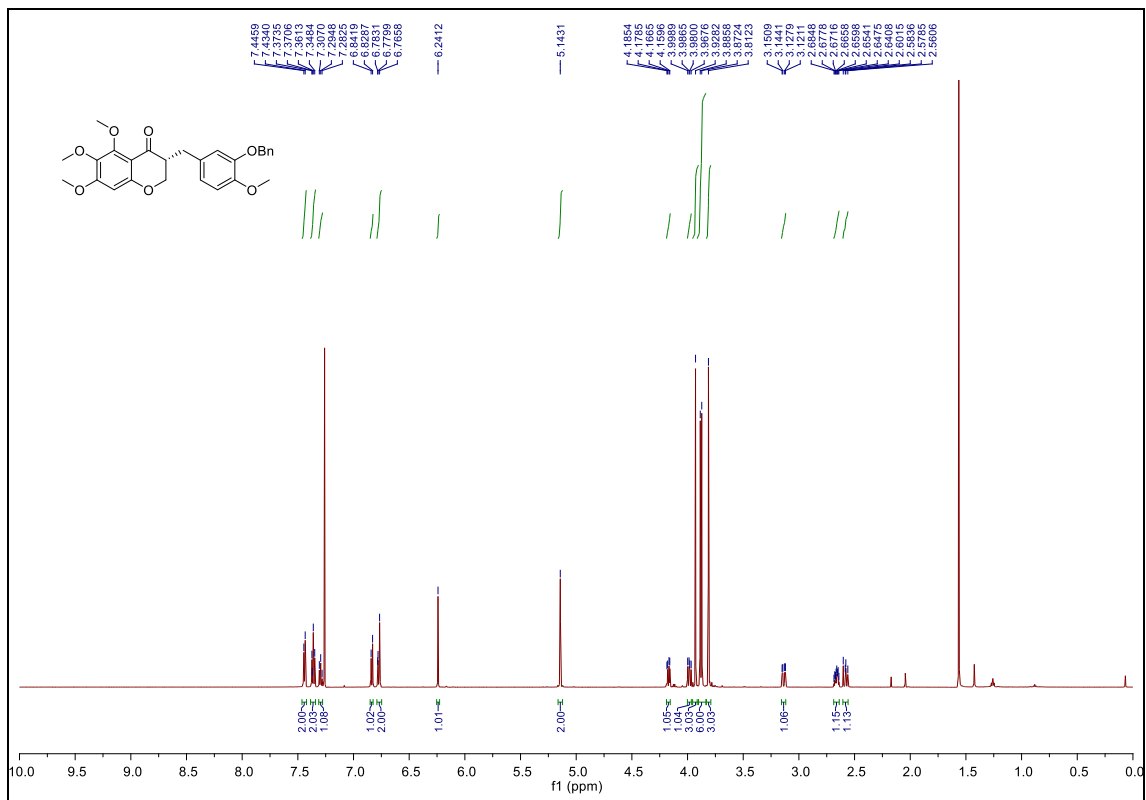

<sup>13</sup>C{<sup>1</sup>H} NMR (150 MHz, CDCl<sub>3</sub>)

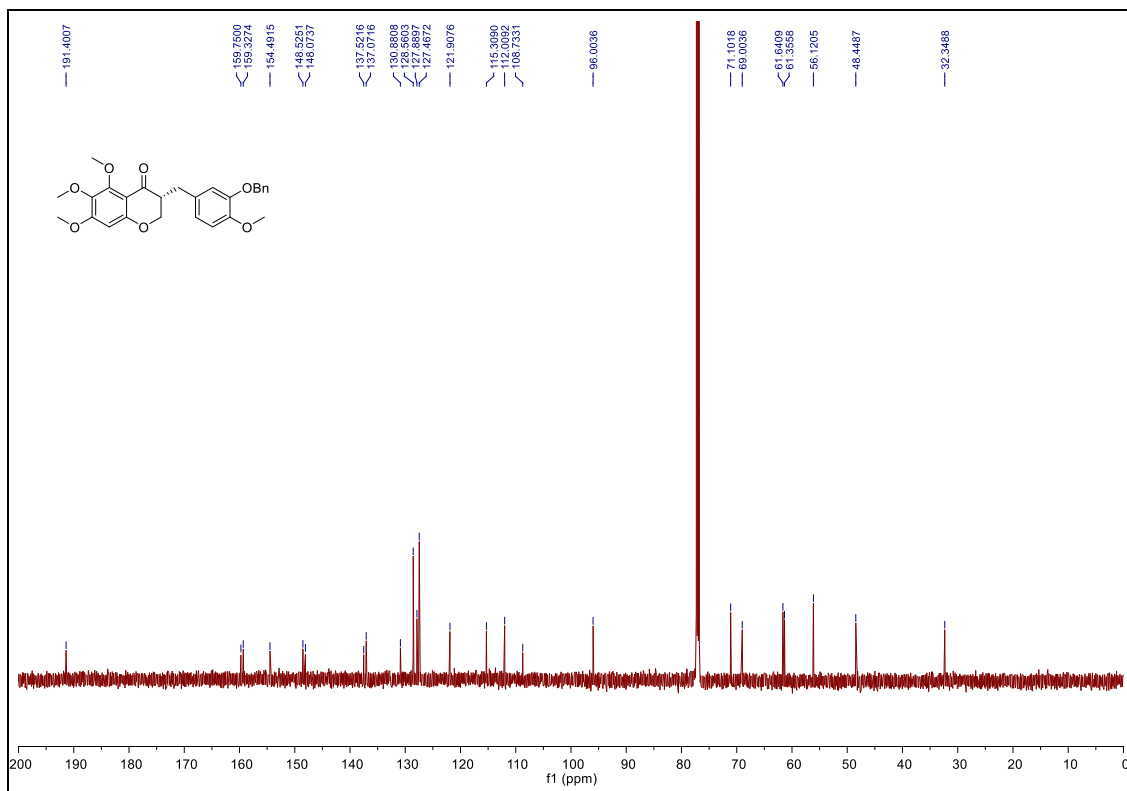

**(R)-3-(3-hydroxy-4-methoxybenzyl)-5,6,7-trimethoxychroman-4-one ((R)-2)**

<sup>1</sup>H NMR (600 MHz, CDCl<sub>3</sub>)

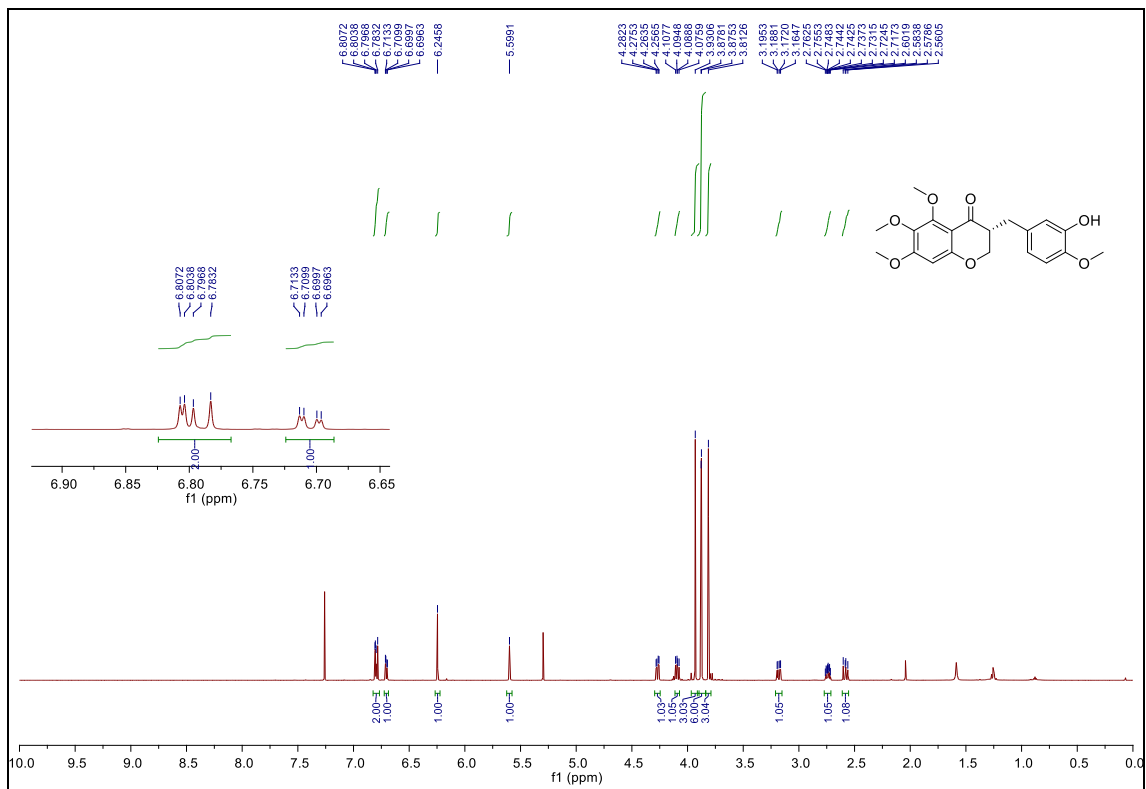

<sup>13</sup>C{<sup>1</sup>H} NMR (150 MHz, CDCl<sub>3</sub>)

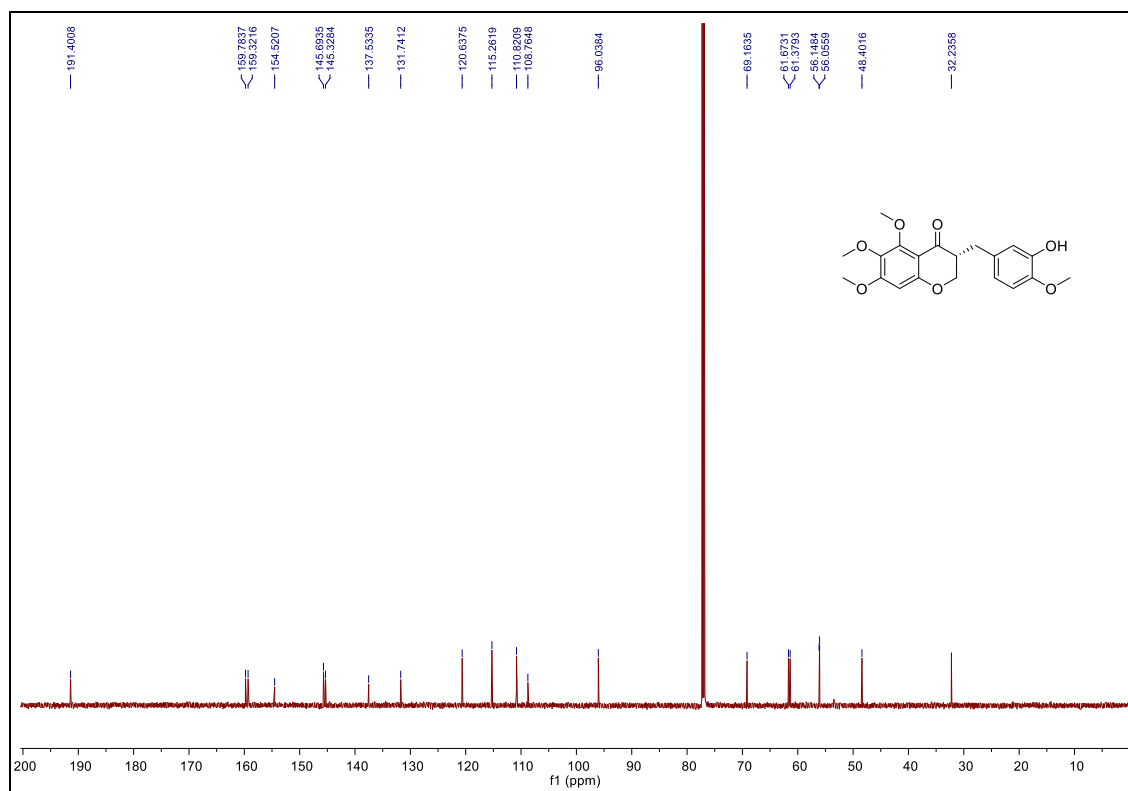

**(S)-3-(3-hydroxy-4-methoxybenzyl)-5,6,7-trimethoxychroman-4-one ((S)-2)**

$^1\text{H}$  NMR (600 MHz,  $\text{CDCl}_3$ )

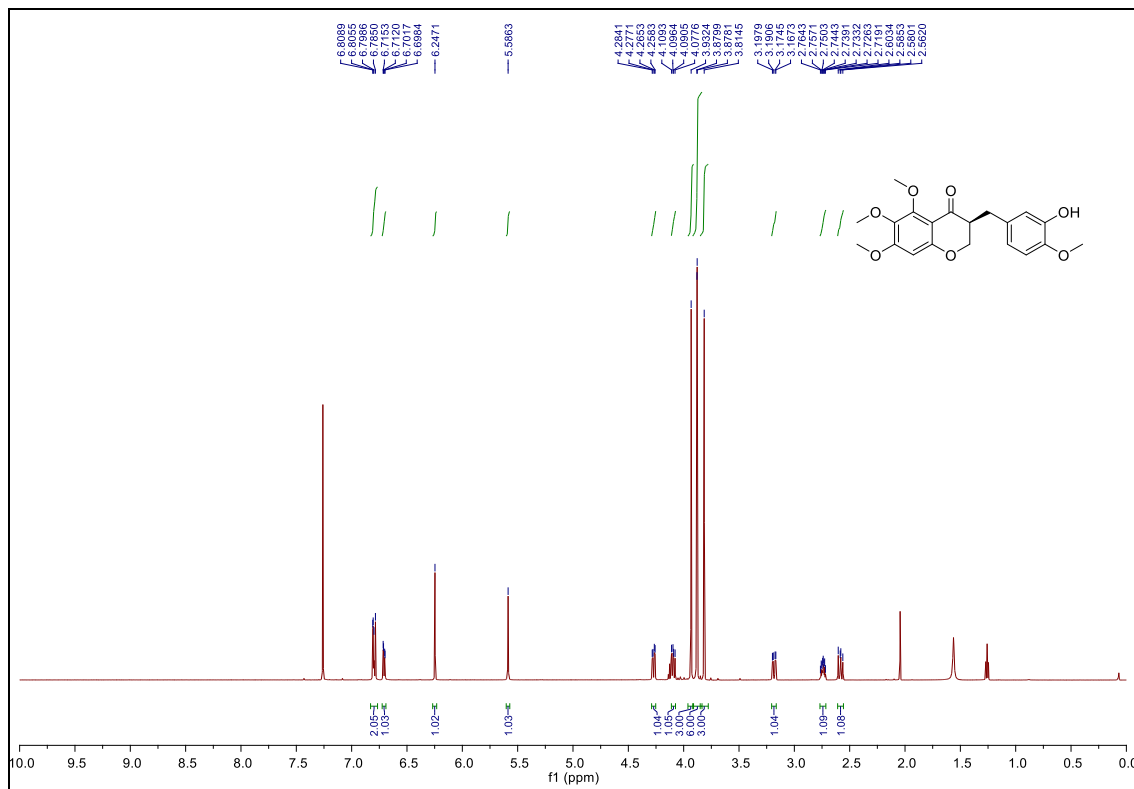

$^{13}\text{C}\{^1\text{H}\}$  NMR (150 MHz,  $\text{CDCl}_3$ )

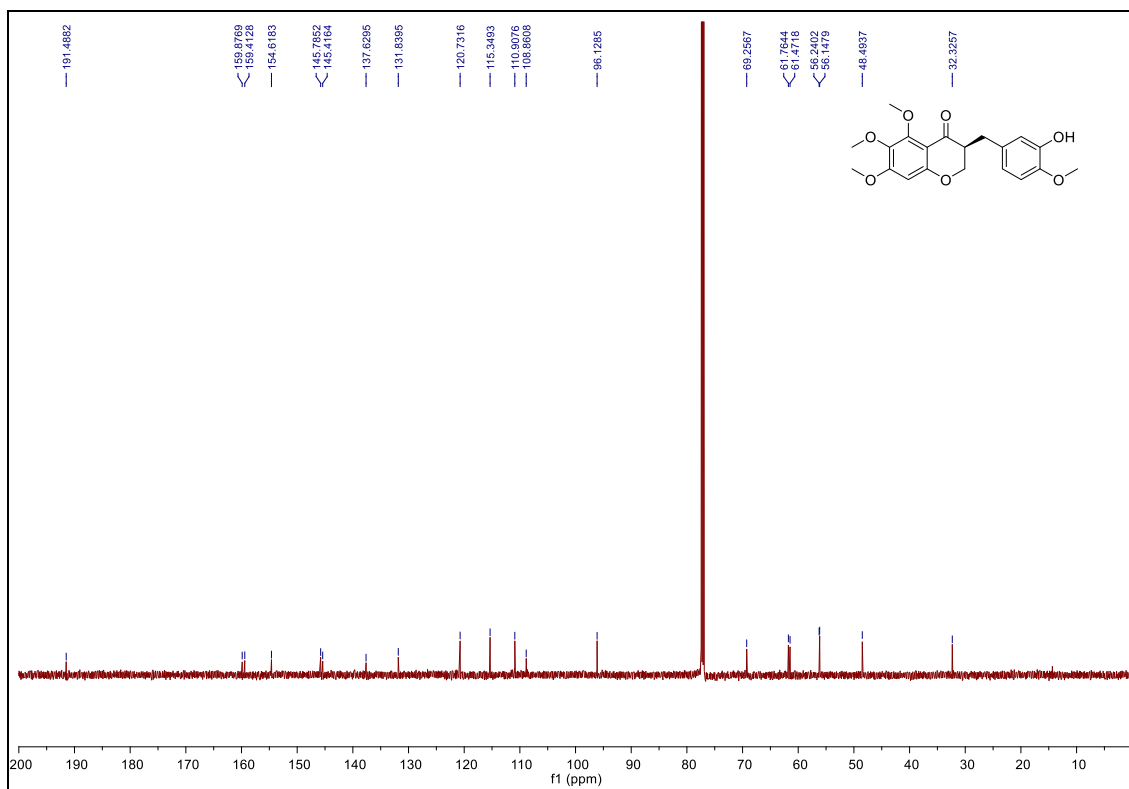



**2-Methoxy-5-(((R)-5,6,7-trimethoxy-4-oxochroman-3-yl)methyl)phenyl(tert-butoxycarbonyl)-L-phenylalaninate ((R,S)-3)**

$^1\text{H}$  NMR (600 MHz,  $\text{CDCl}_3$ )

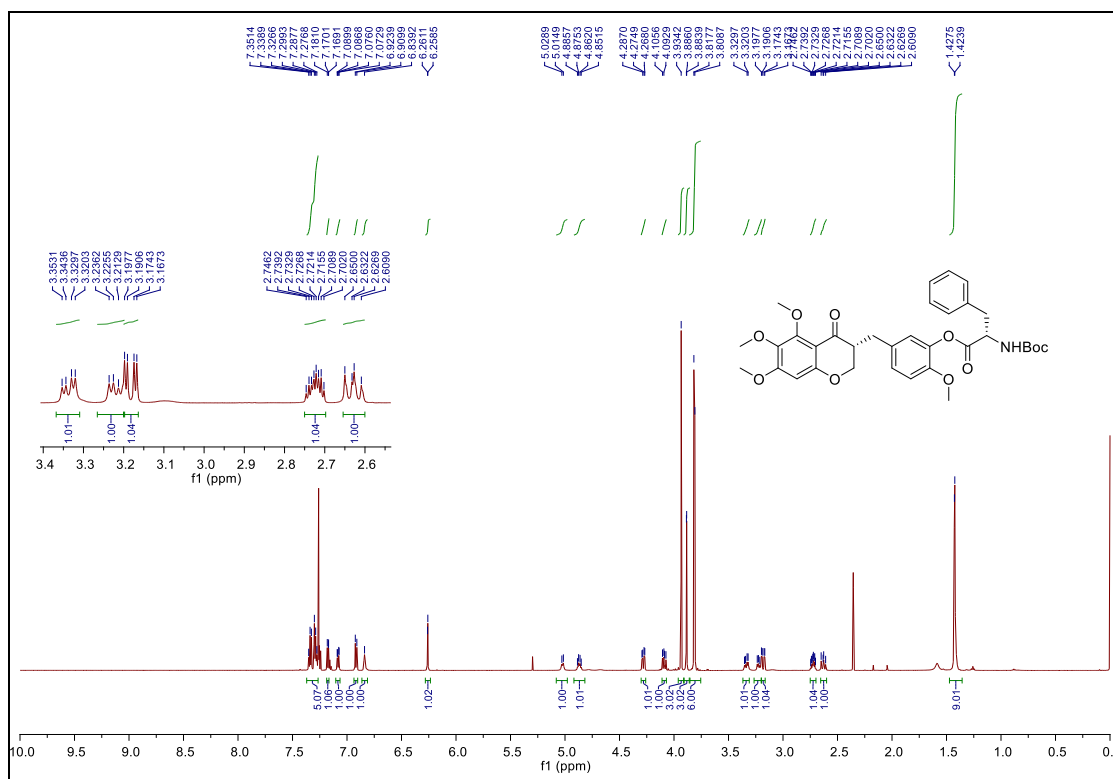

$^{13}\text{C}\{^1\text{H}\}$  NMR (150 MHz,  $\text{CDCl}_3$ )

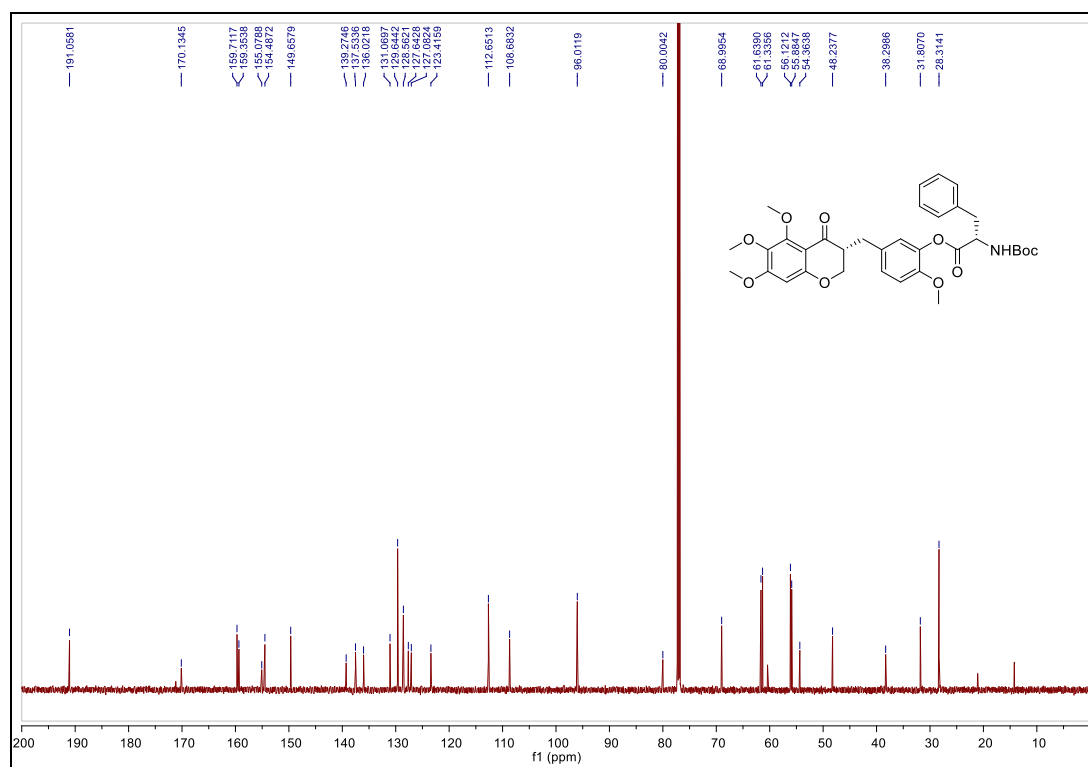

**2-Methoxy-5-(((R)-5,6,7-trimethoxy-4-oxochroman-3-yl)methyl)phenyl(tert-butoxycarbonyl)-D-phenylalaninate ((R,R)-3)**

$^1\text{H}$  NMR (600 MHz,  $\text{CDCl}_3$ )

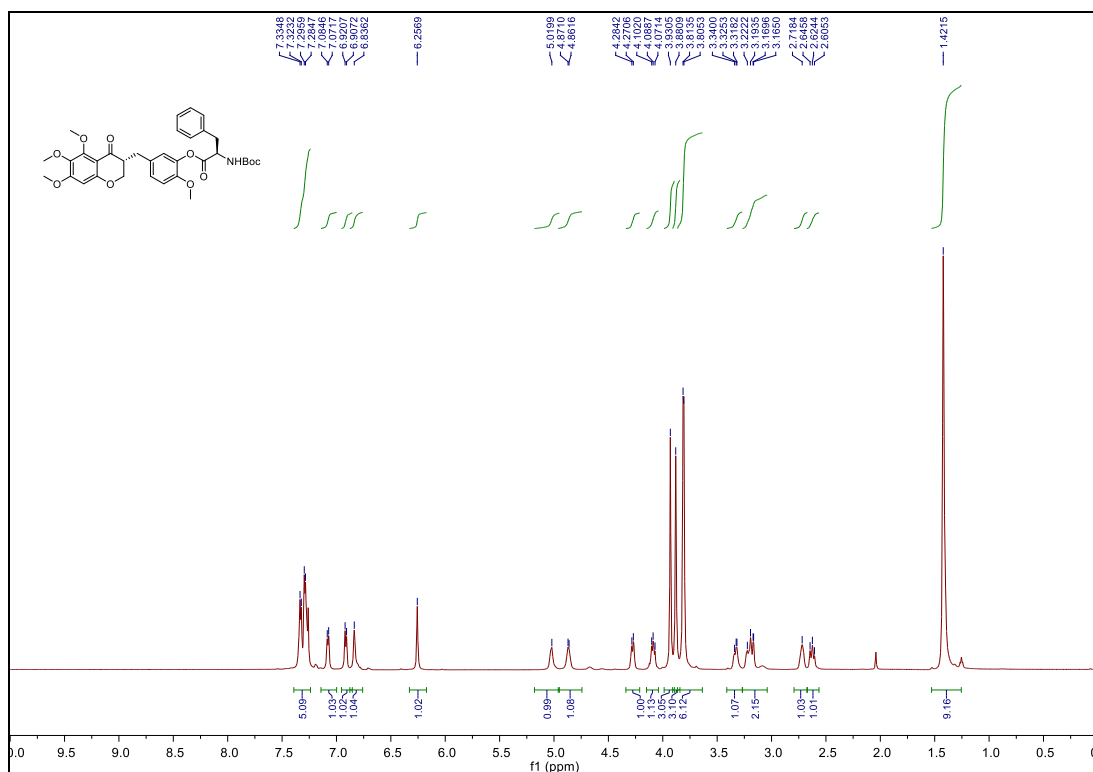

$^{13}\text{C}\{^1\text{H}\}$  NMR (150 MHz,  $\text{CDCl}_3$ )

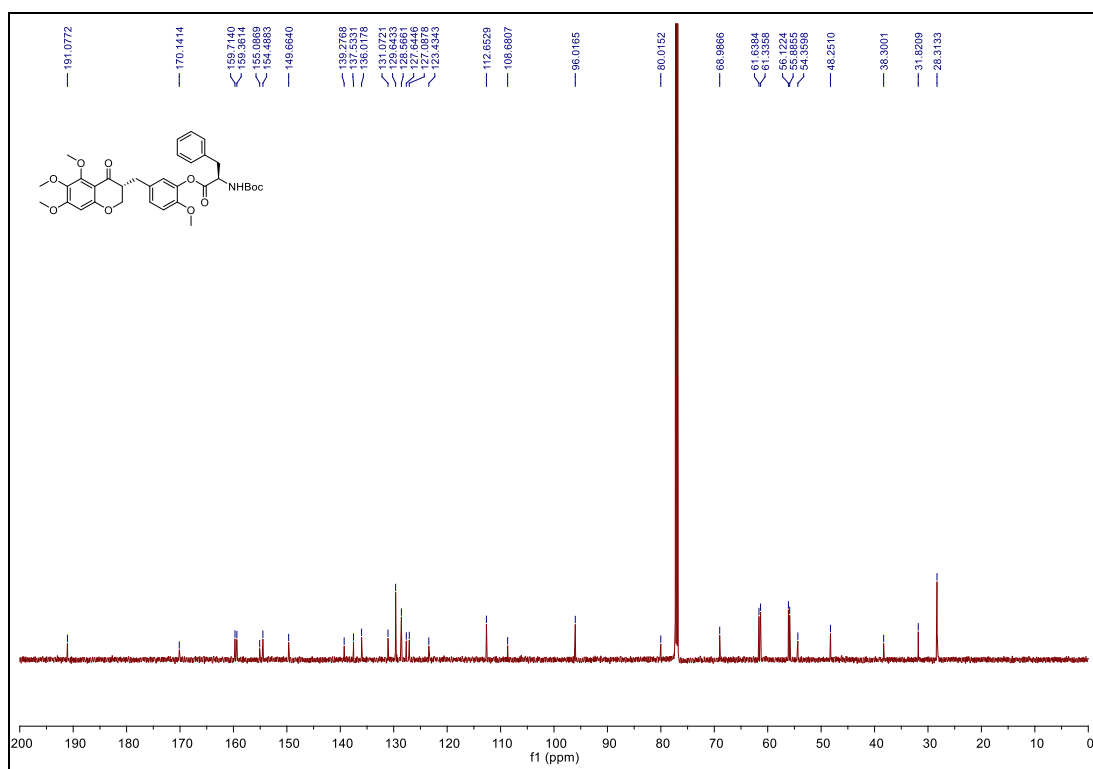

**2-Methoxy-5-(((S)-5,6,7-trimethoxy-4-oxochroman-3-yl)methyl)phenyl(tert-butoxycarbonyl)-L-phenylalaninate ((S,S)-3)**

$^1\text{H}$  NMR (600 MHz,  $\text{CDCl}_3$ )

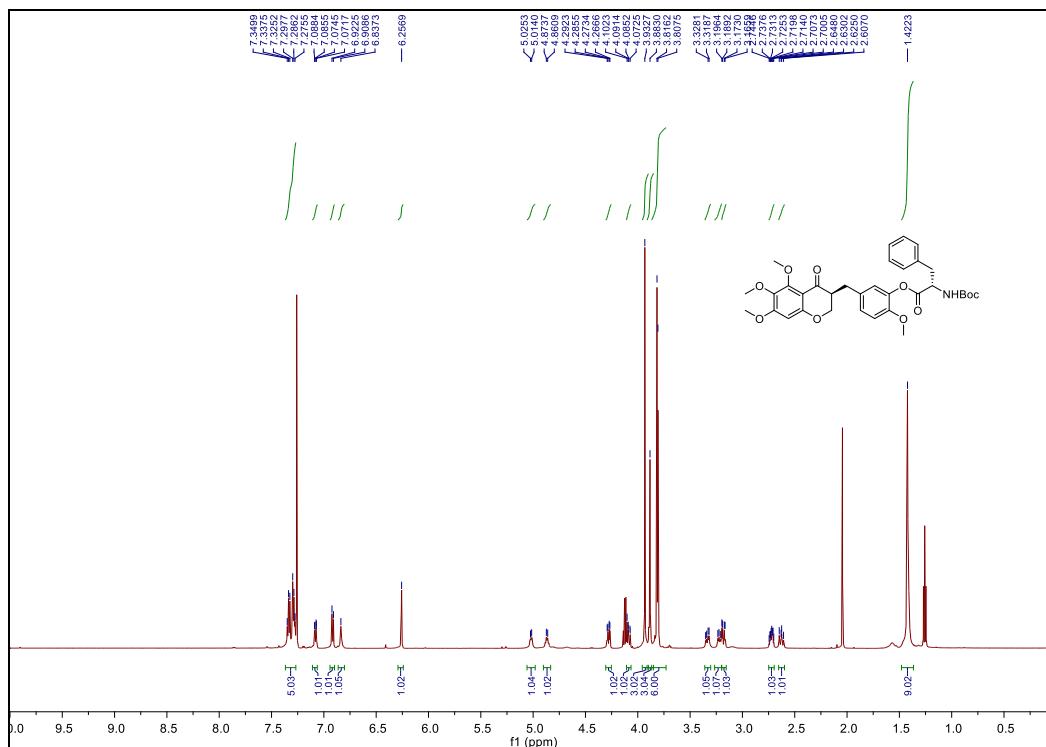

$^{13}\text{C}\{^1\text{H}\}$  NMR (150 MHz,  $\text{CDCl}_3$ )

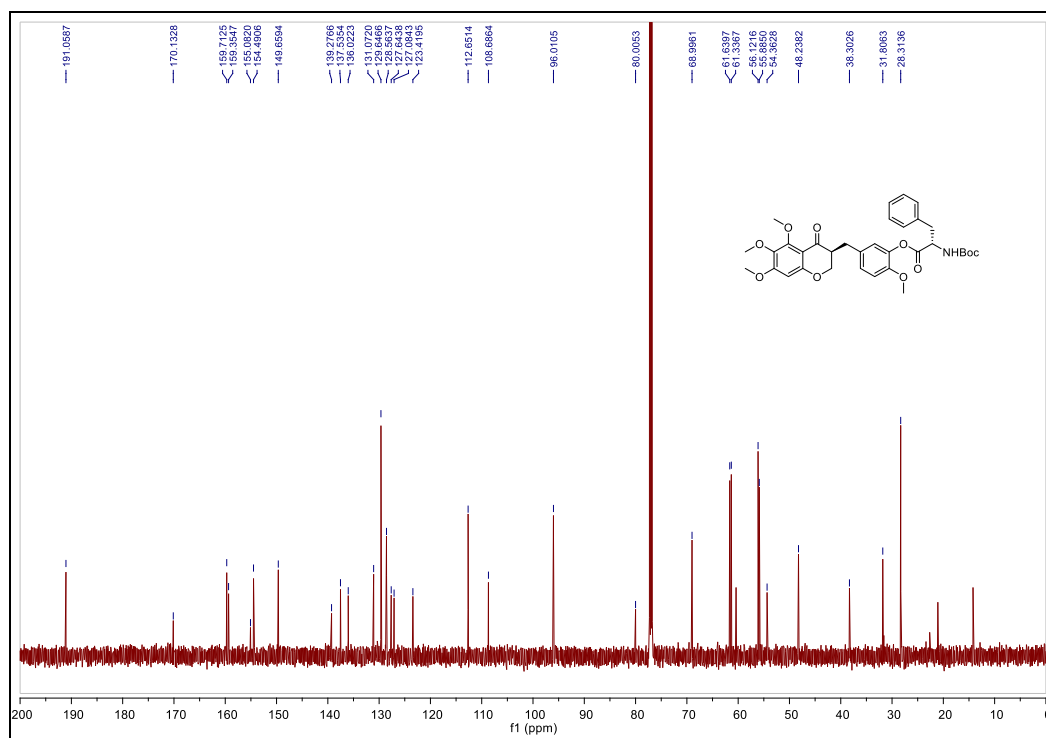

**2-Methoxy-5-(((S)-5,6,7-trimethoxy-4-oxochroman-3-yl)methyl)phenyl(tert-butoxycarbonyl)-D-phenylalaninate ((S,R)-3)**

$^1\text{H}$  NMR (600 MHz,  $\text{CDCl}_3$ )

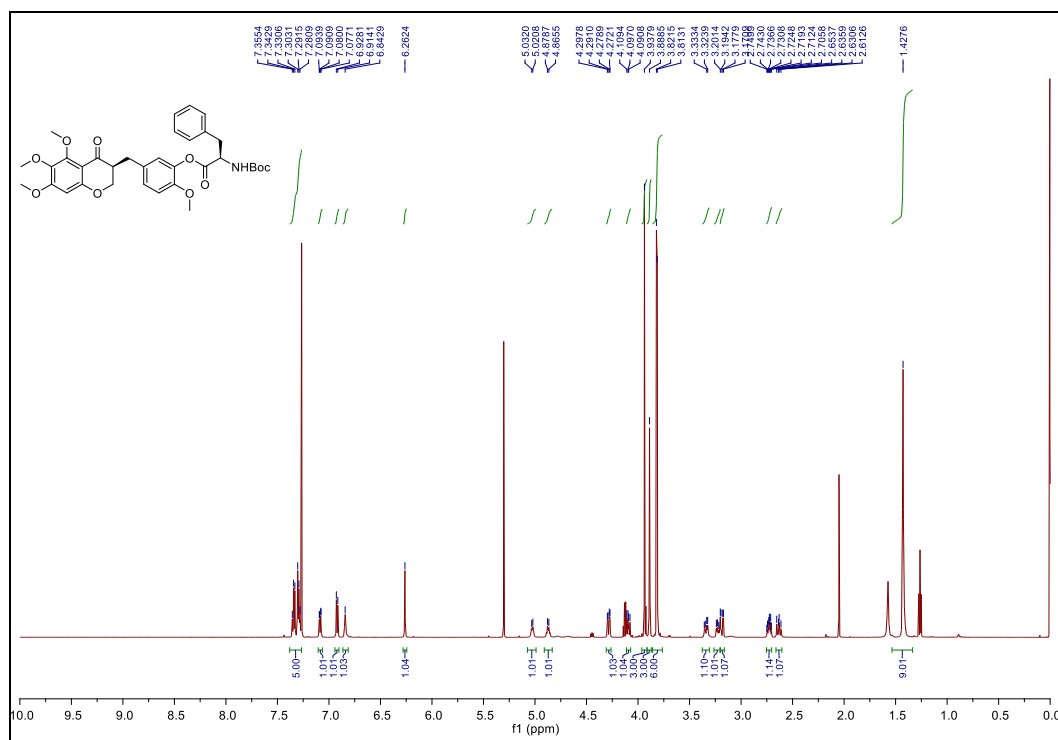

$^{13}\text{C}\{^1\text{H}\}$  NMR (150 MHz,  $\text{CDCl}_3$ )

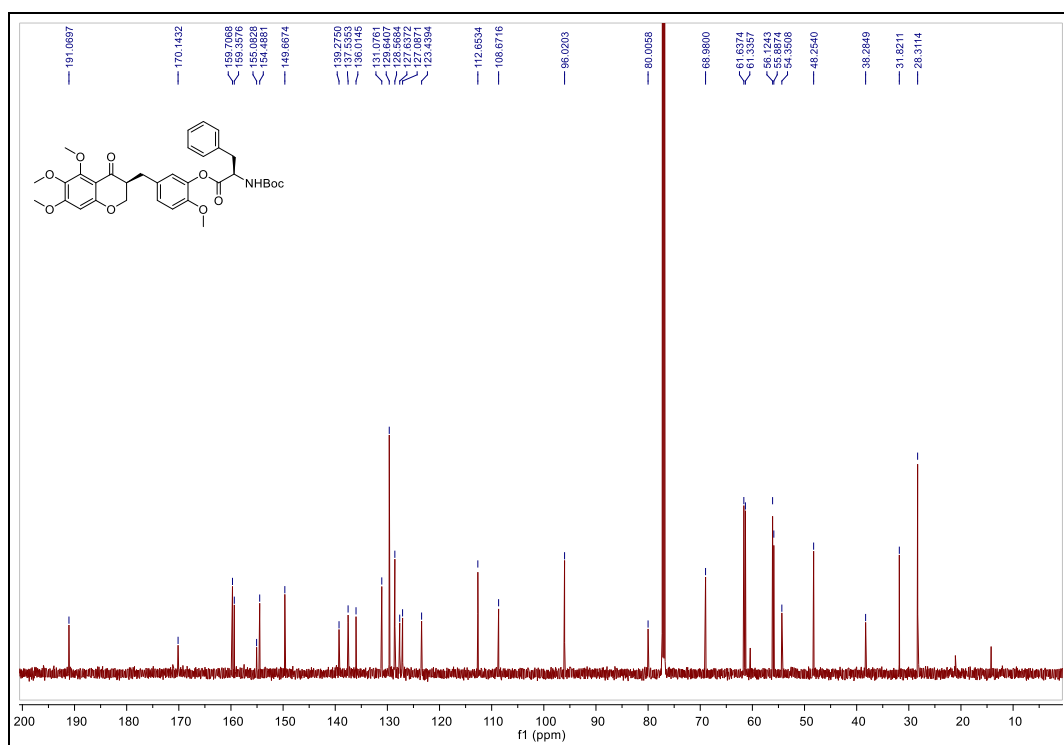

**(S)-2-methoxy-5-((5,6,7-trimethoxychroman-3-yl)methyl)phenol ((S)-10)**

$^1\text{H}$  NMR (600 MHz,  $\text{CDCl}_3$ )

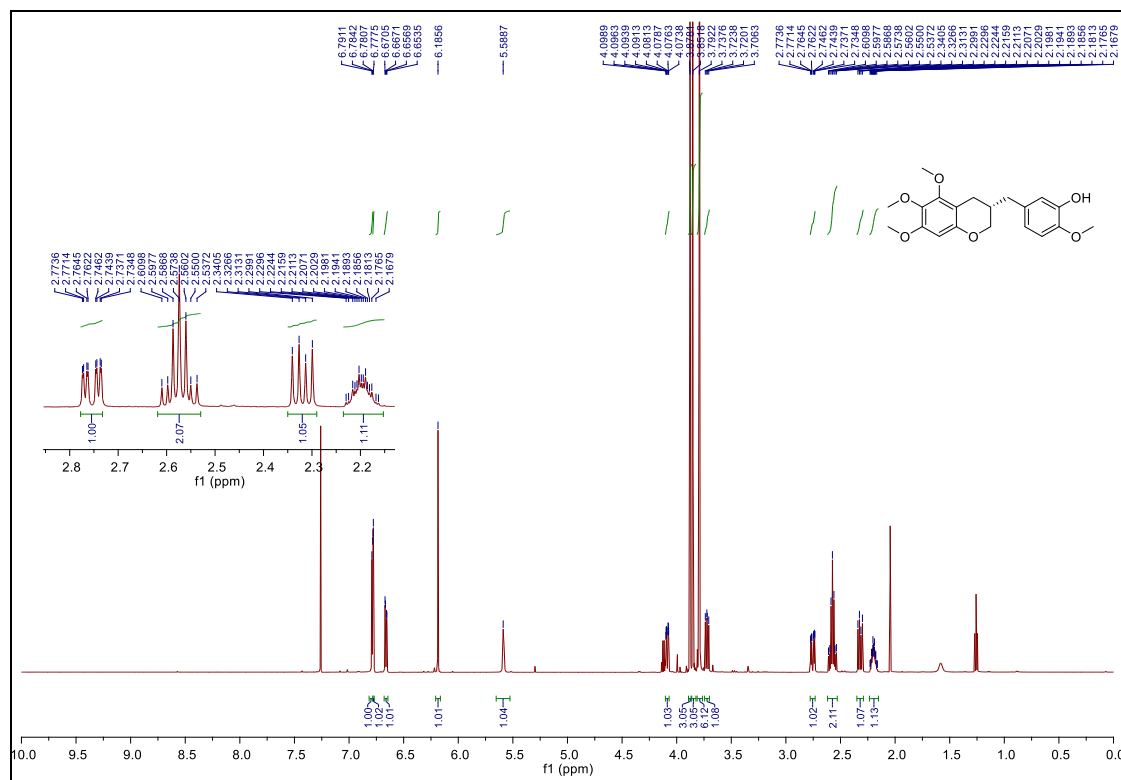

$^{13}\text{C}\{^1\text{H}\}$  NMR (150 MHz,  $\text{CDCl}_3$ )

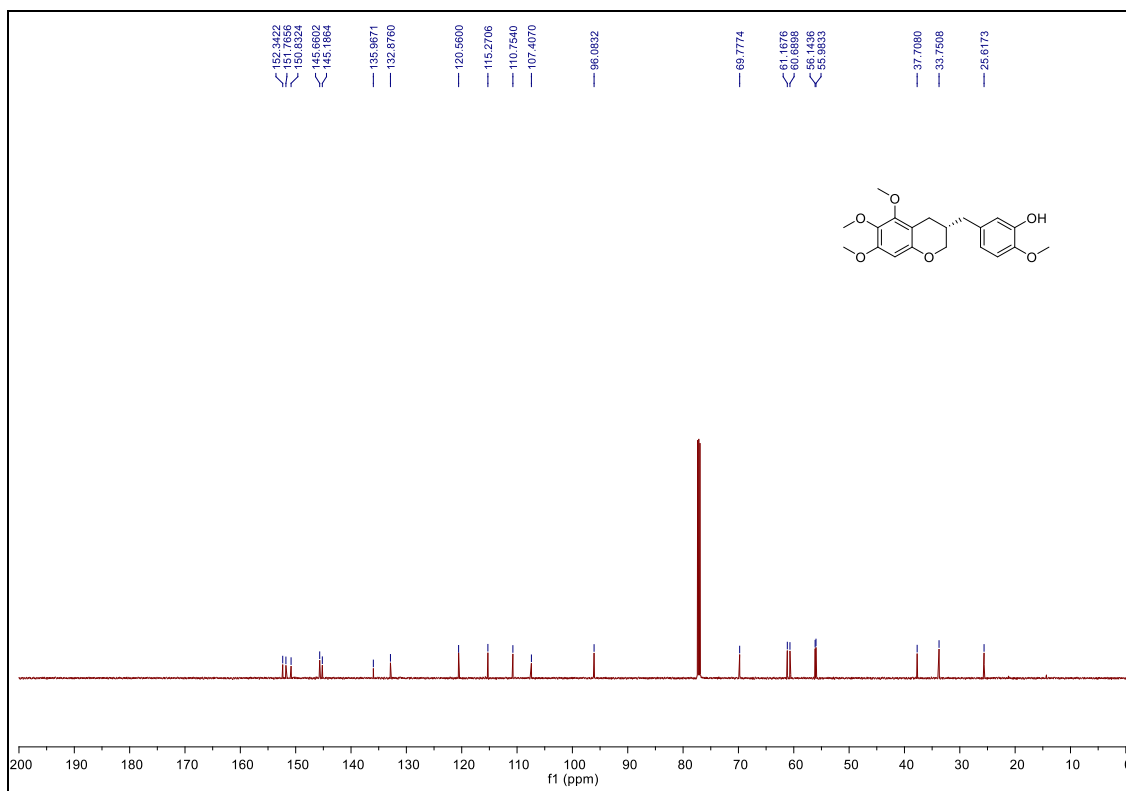

**(R)-2-methoxy-5-((5,6,7-trimethoxychroman-3-yl)methyl)phenol ((R)-10)**

$^1\text{H}$  NMR (600 MHz,  $\text{CDCl}_3$ )

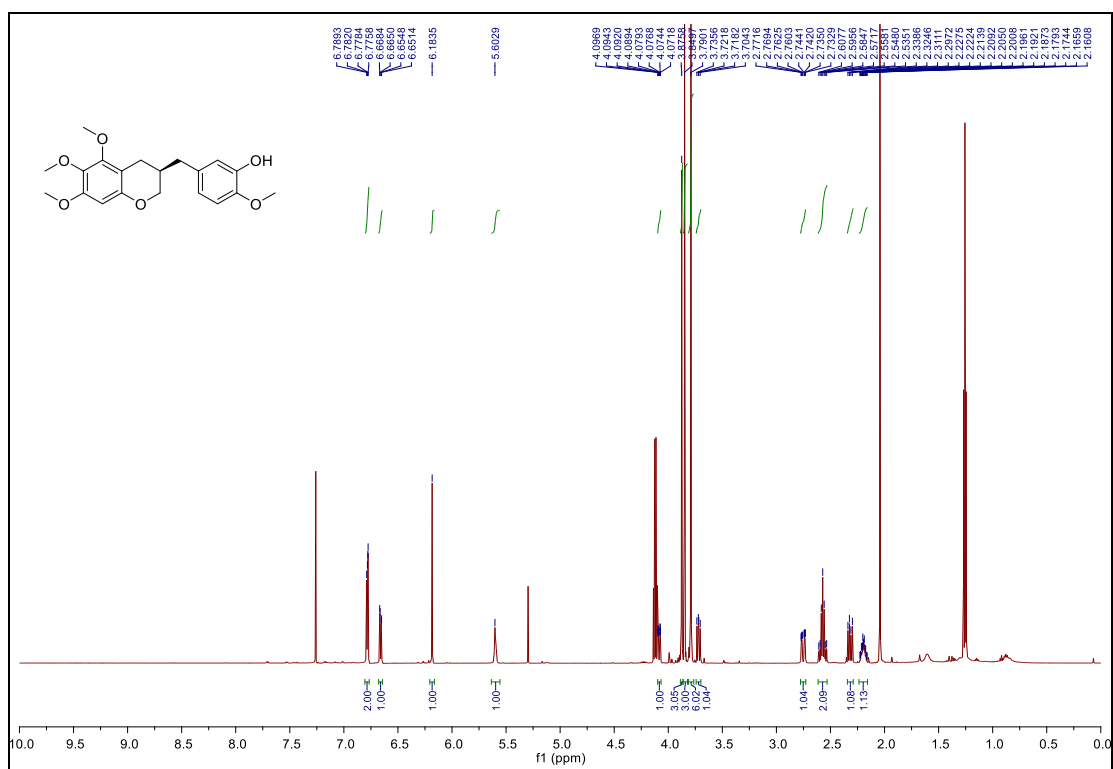

$^{13}\text{C}\{^1\text{H}\}$  NMR (150 MHz,  $\text{CDCl}_3$ )

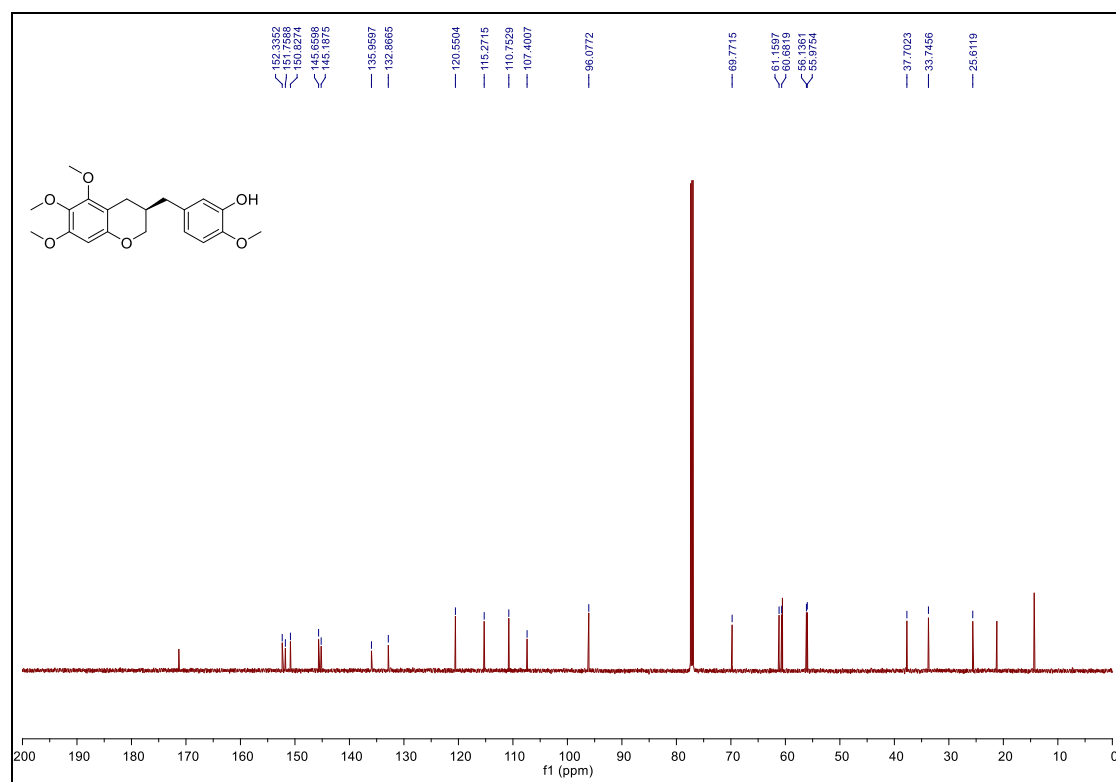

**(R)-7-(benzyloxy)-3-(3-(benzyloxy)-4-methoxybenzyl)-5,6-dimethoxychroman-4-one((R)-11)**

$^1\text{H}$  NMR (600 MHz,  $\text{CDCl}_3$ )

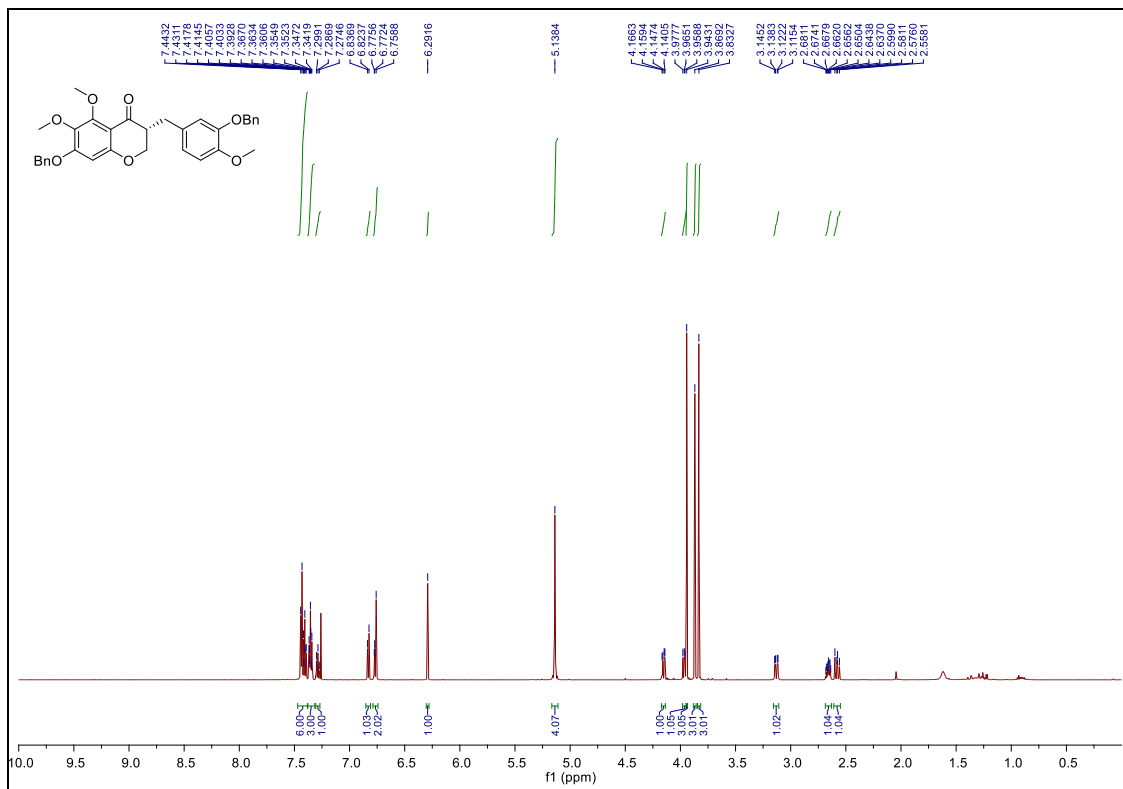

$^{13}\text{C}\{^1\text{H}\}$  NMR (150 MHz,  $\text{CDCl}_3$ )

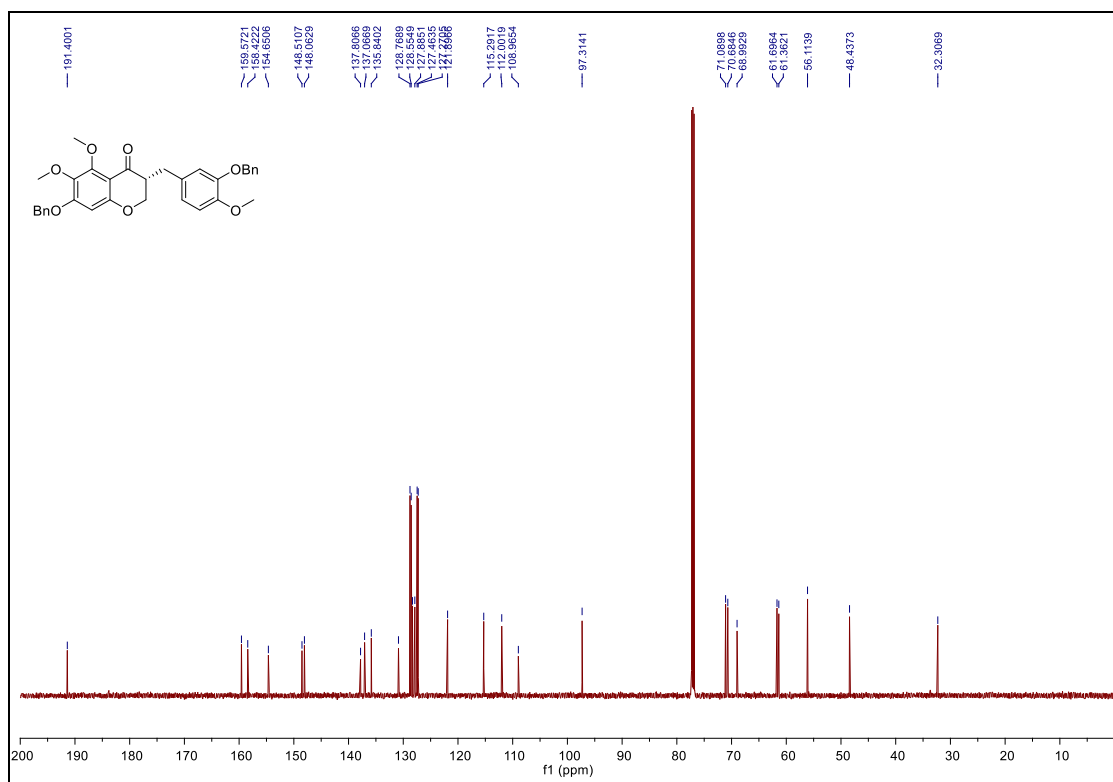

**(S)-7-(benzyloxy)-3-(3-(benzyloxy)-4-methoxybenzyl)-5,6-dimethoxychroman-4-one ((S)-11)**

$^1\text{H}$  NMR (600 MHz,  $\text{CDCl}_3$ )

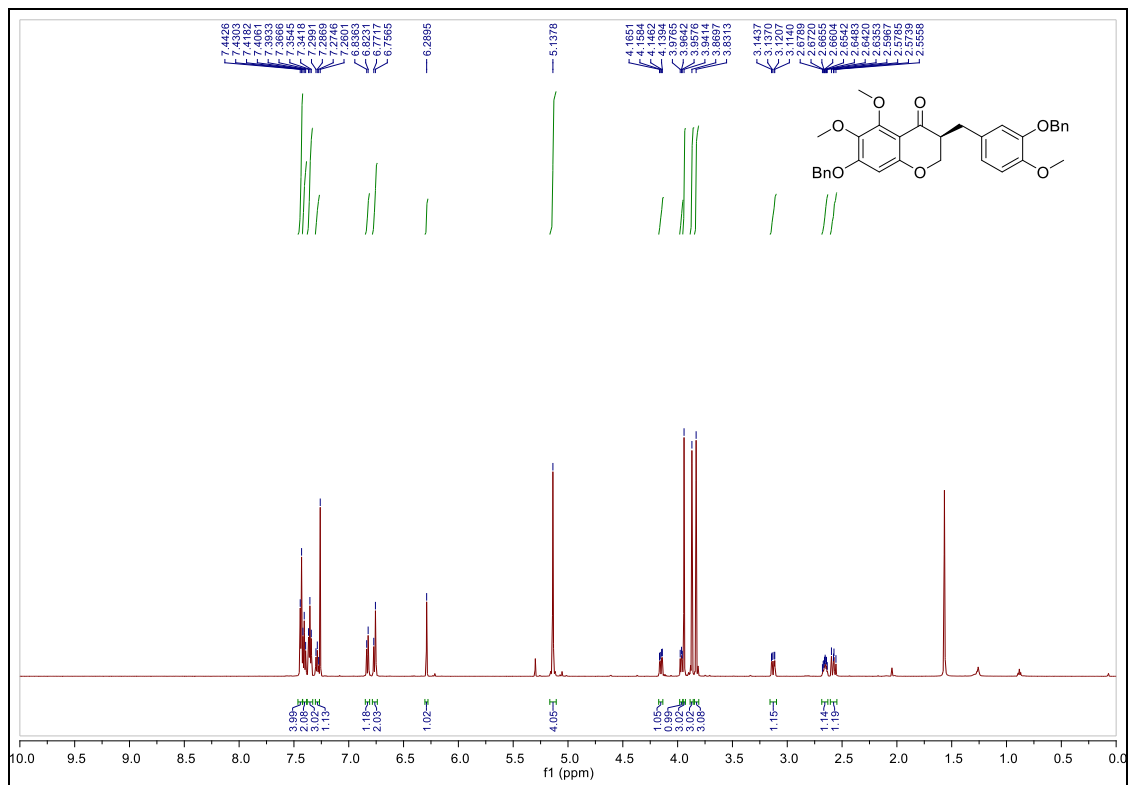

$^{13}\text{C}\{^1\text{H}\}$  NMR (150 MHz,  $\text{CDCl}_3$ )

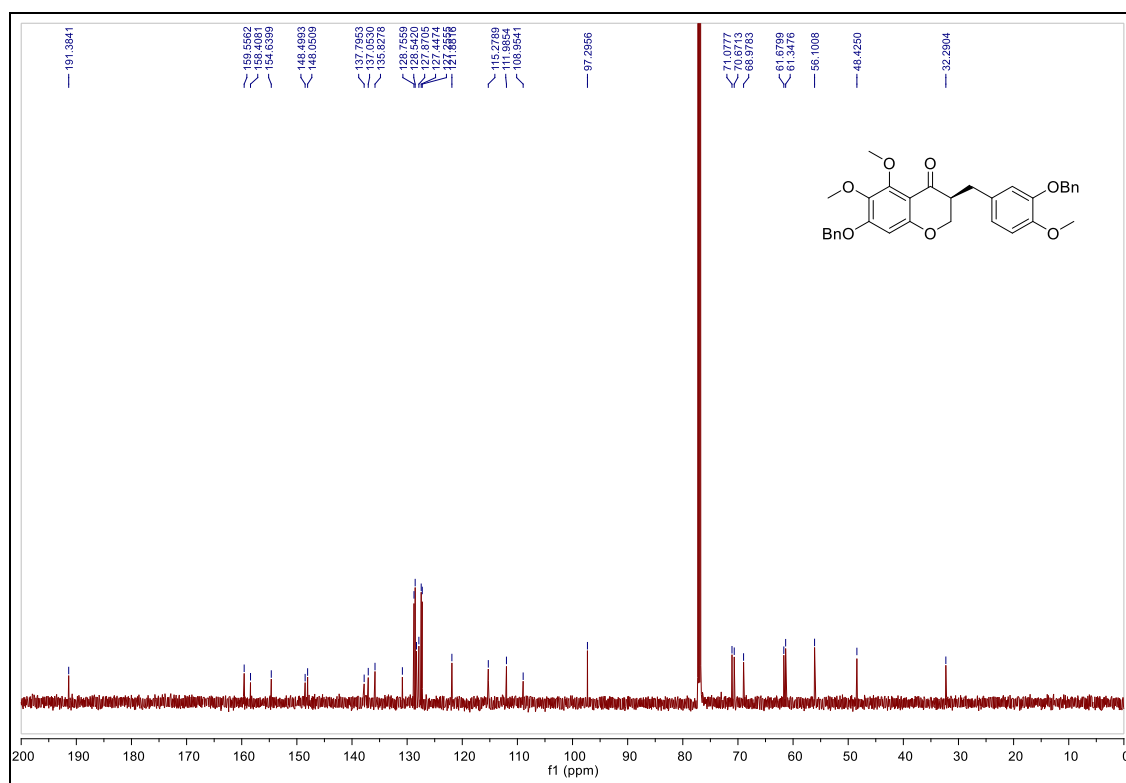



# 7-Hydroxy-3-(3-hydroxy-4-methoxybenzyl)-5,6-dimethoxychroman-4-one ((R)-6)

$^1\text{H}$  NMR (600 MHz,  $\text{CDCl}_3$ )

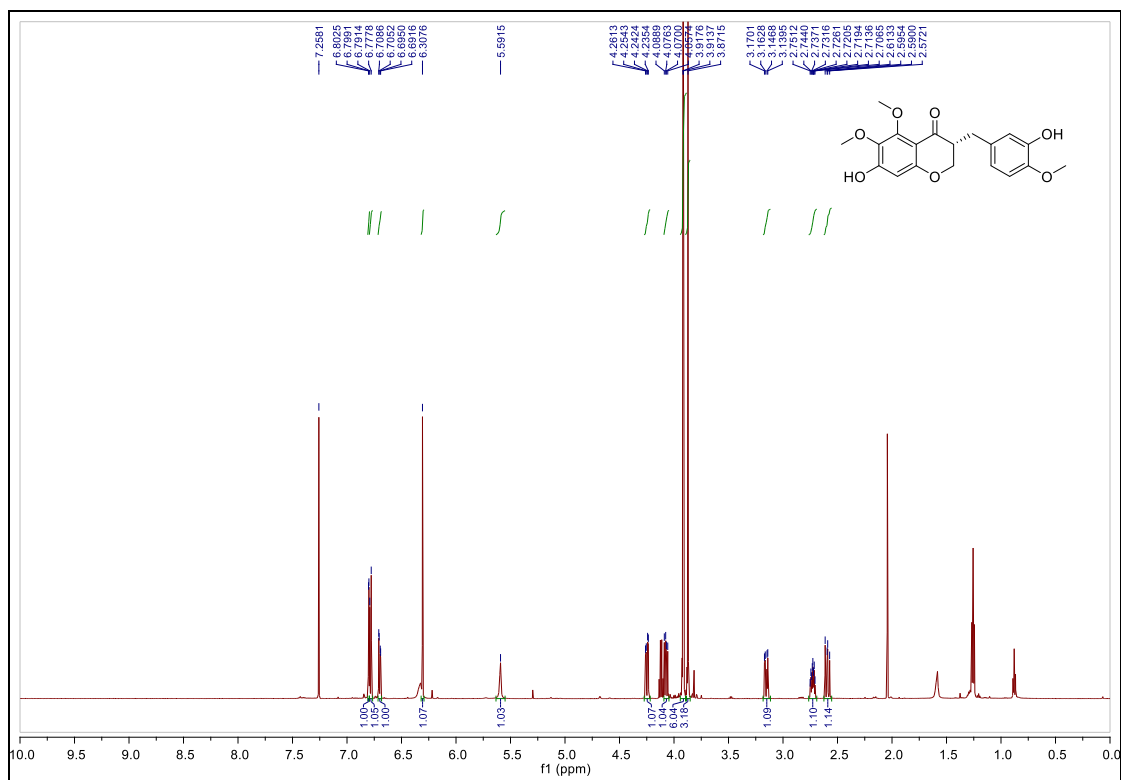

$^{13}\text{C}\{^1\text{H}\}$  NMR (150 MHz,  $\text{CDCl}_3$ )

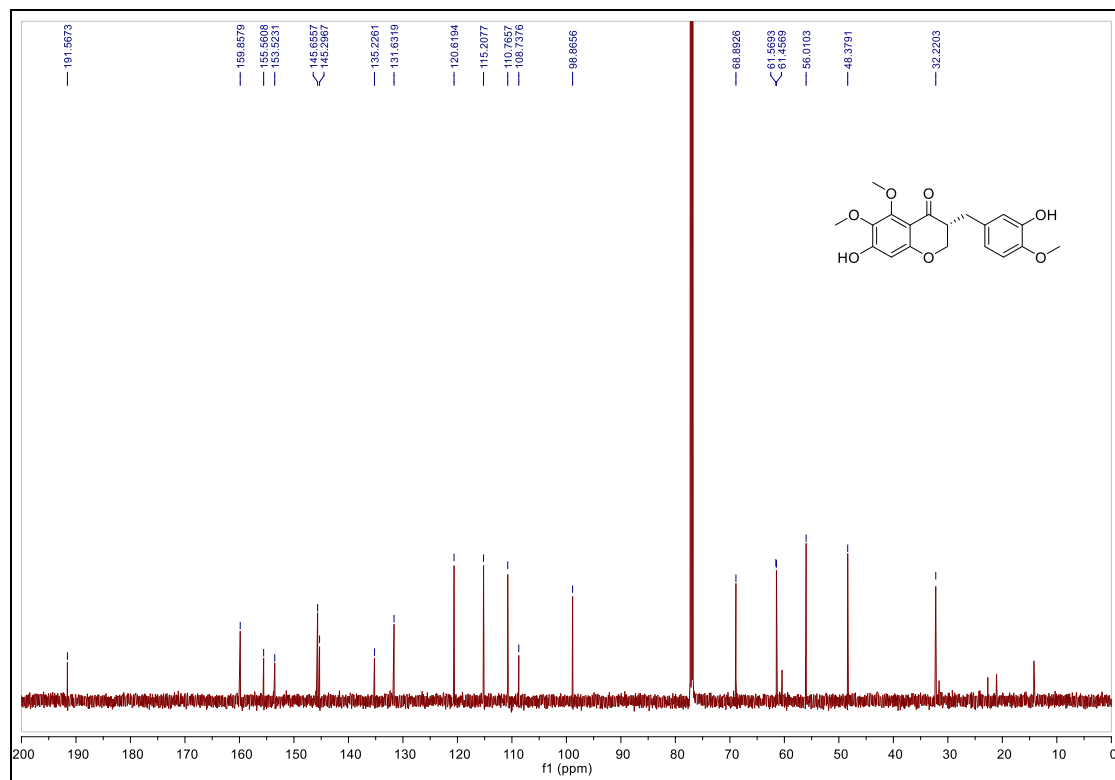

# 7-Hydroxy-3-(3-hydroxy-4-methoxybenzyl)-5,6-dimethoxychroman-4-one ((S)-6)

$^1\text{H}$  NMR (600 MHz,  $\text{CDCl}_3$ )

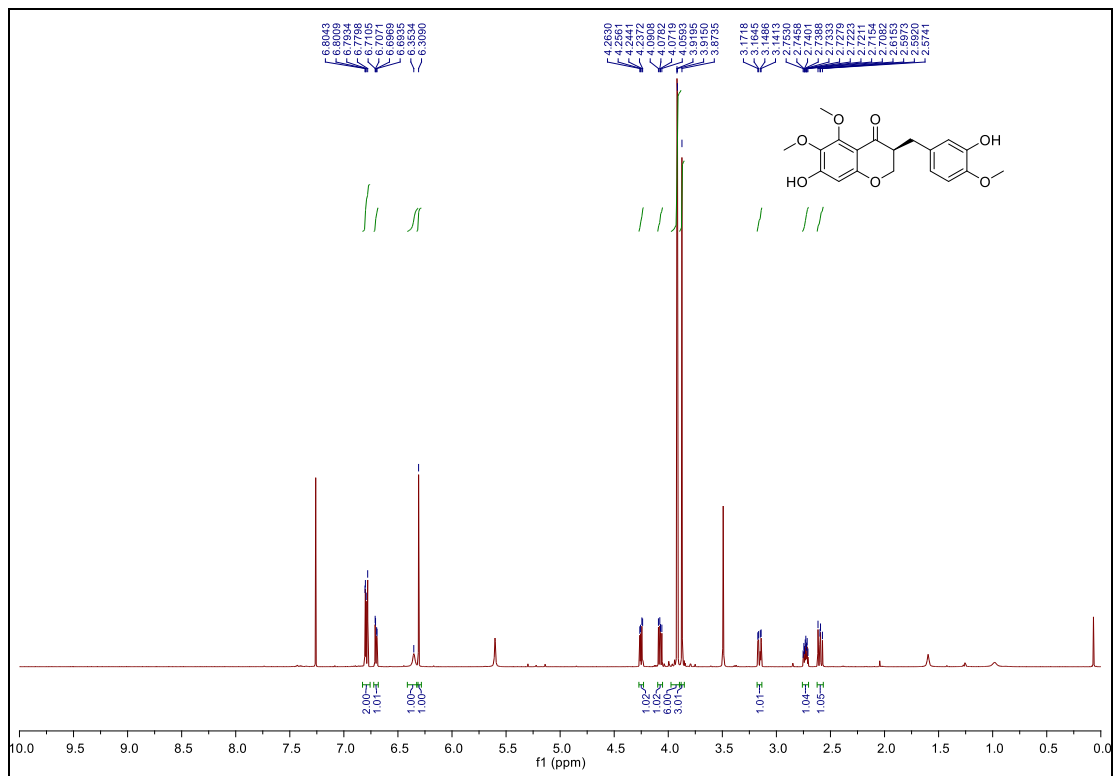

$^{13}\text{C}\{^1\text{H}\}$  NMR (150 MHz,  $\text{CDCl}_3$ )

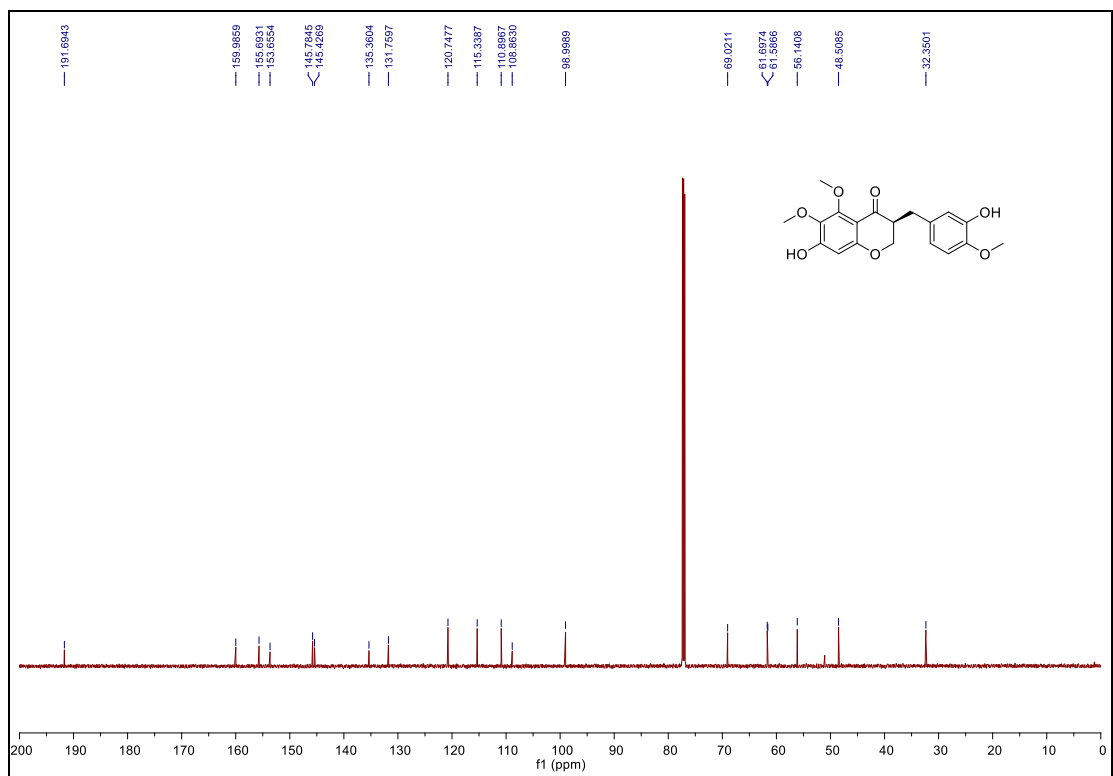

**(R)-Cremastranone ((R)-1)**

<sup>1</sup>H NMR (600 MHz, CD<sub>3</sub>OD)

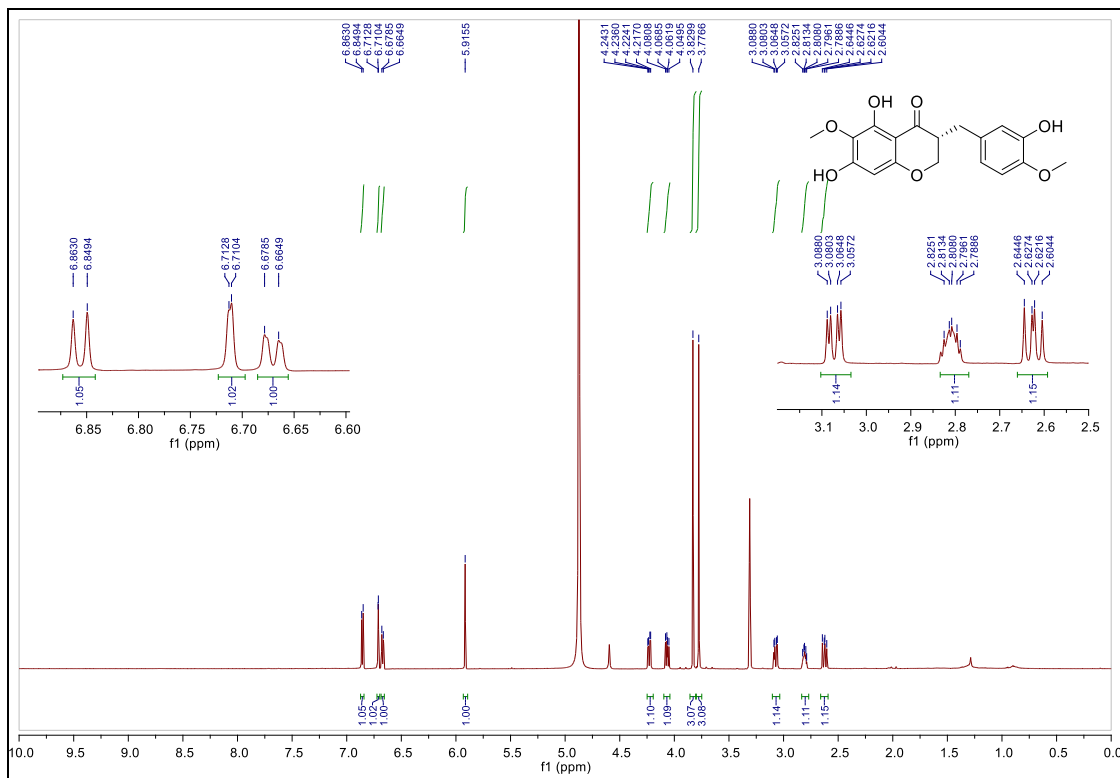

<sup>13</sup>C{<sup>1</sup>H} NMR (150 MHz, CD<sub>3</sub>OD)

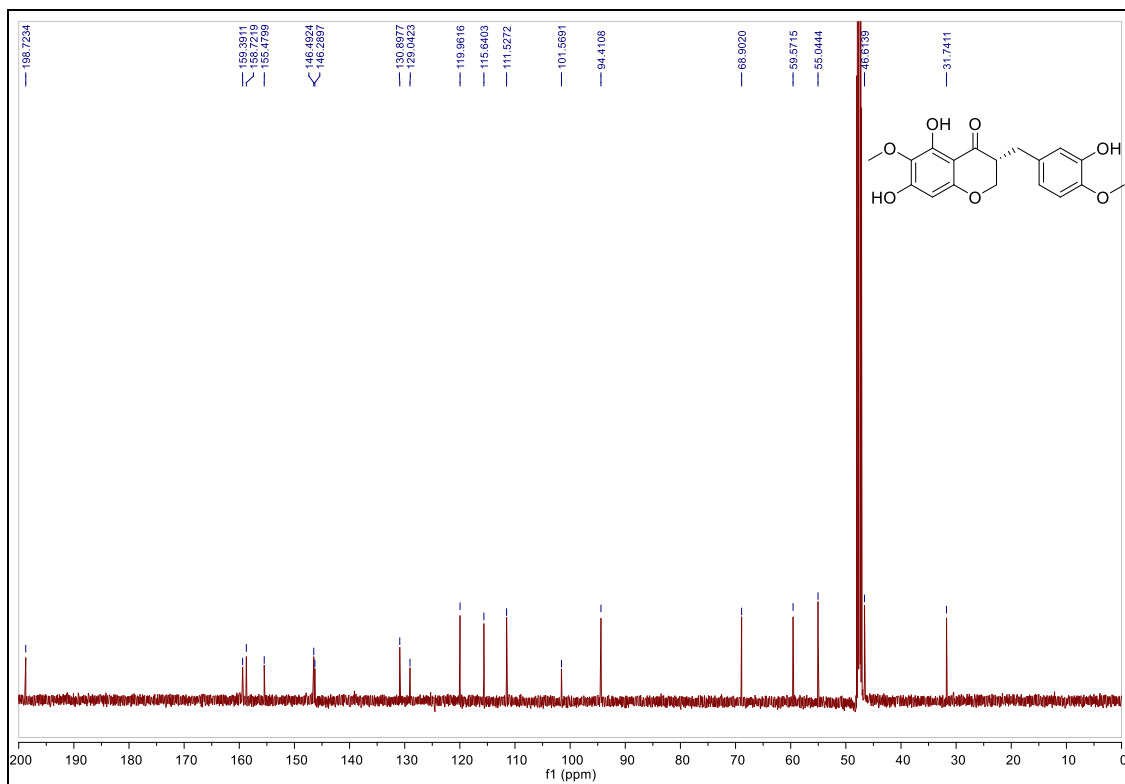

**(S)-Cremastranone ((S)-1)**

$^1\text{H}$  NMR (600 MHz,  $\text{CD}_3\text{OD}$ )

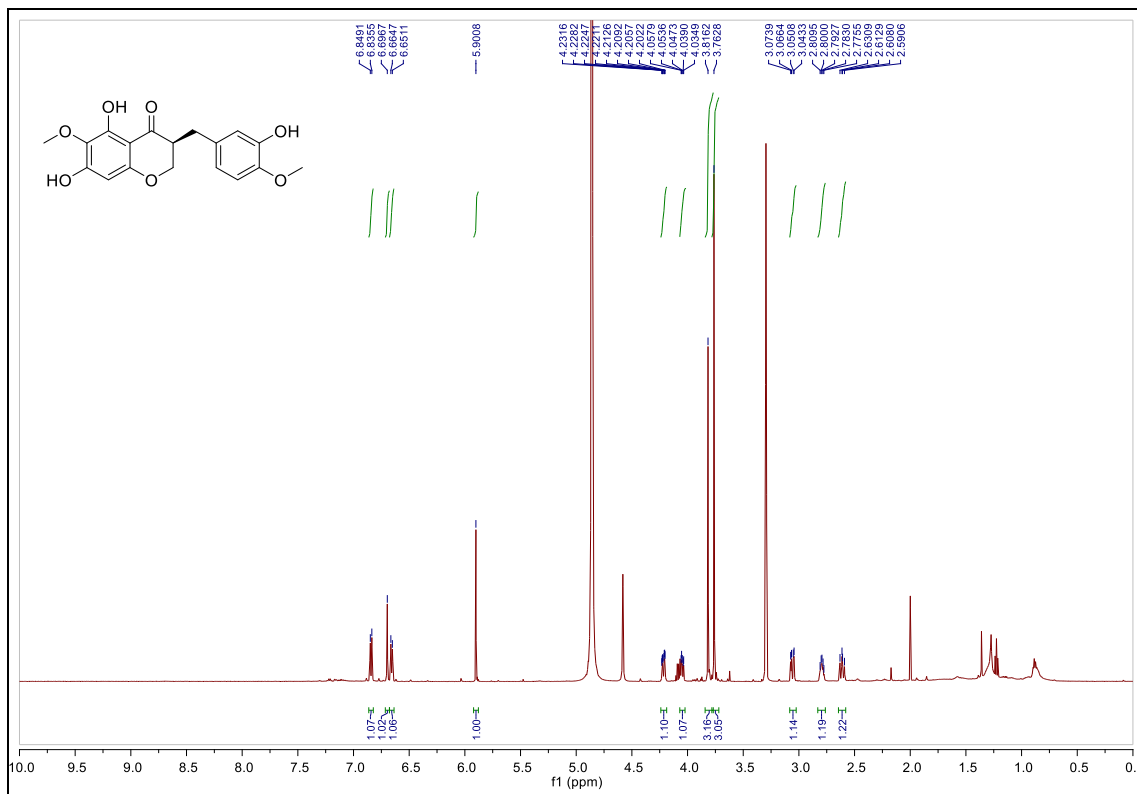

$^{13}\text{C}\{^1\text{H}\}$  NMR (150 MHz,  $\text{CD}_3\text{OD}$ )

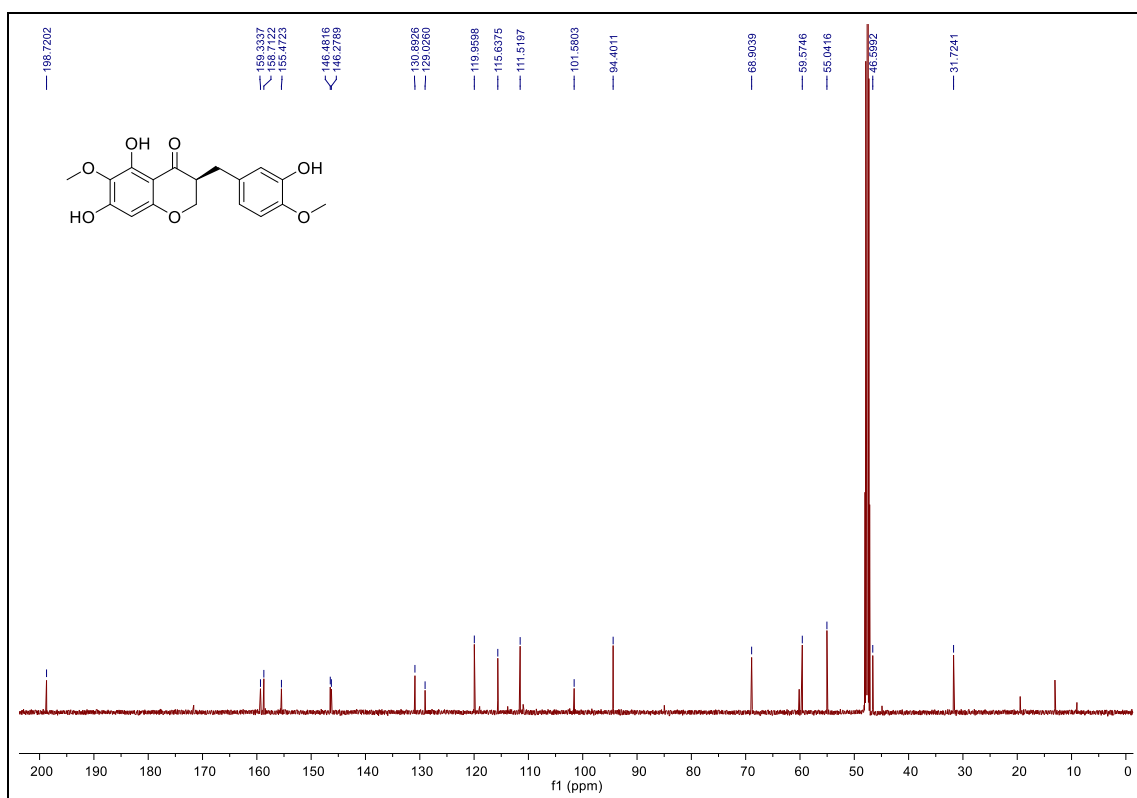

## 7. Copies of chiral HPLC

### 1) Racemic 9a

Sample Name: mhy 4-74-R5

```

=====
Acq. Operator   : JHJIN                      Seq. Line :    3
Acq. Instrument : Instrument 1                Location  : Vial 3
Injection Date  : 12/4/2018 5:59:42 PM      Inj       :    1
                                           Inj Volume: 5.0 µl

Acq. Method    : C:\CHEM32\1\DATA\DEF_LC 2018-12-04 15-43-49\1.M
Last changed   : 12/4/2018 3:43:47 PM by JHJIN
Analysis Method: C:\CHEM32\1\METHODS\DEF_LC.M
Last changed   : 7/3/2019 7:53:02 PM by SYSTEM
               (modified after loading)

Sample Info    : CHIRALPAK AD-3
               Hex/EtOH=60/40
               Flow rate:0.5ml/min
    
```

Additional Info : Peak(s) manually integrated

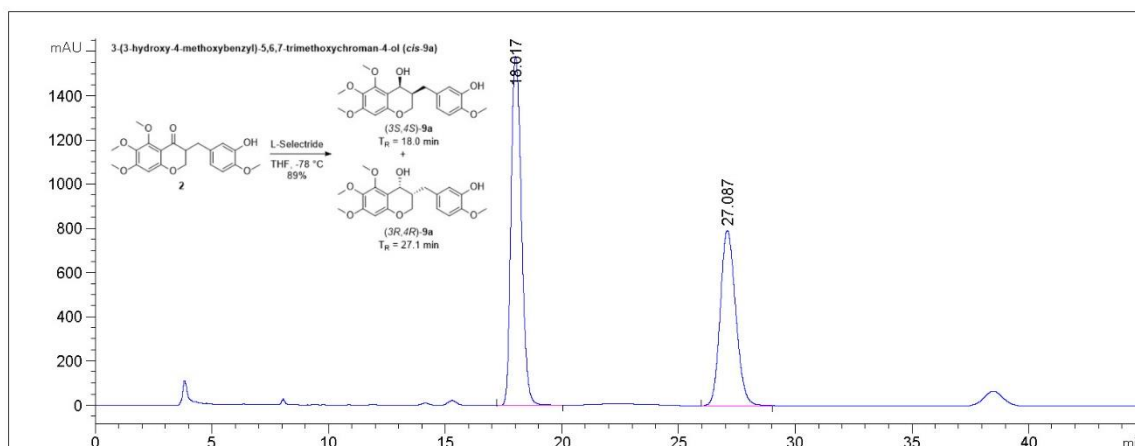

#### Area Percent Report

```

=====
Sorted By      :      Signal
Multiplier     :      1.0000
Dilution       :      1.0000
Do not use Multiplier & Dilution Factor with ISTDs
    
```

Signal 1: DAD1 C, Sig=210,8 Ref=360,100

| Peak # | RetTime [min] | Type | Width [min] | Area [mAU*s] | Height [mAU] | Area %  |
|--------|---------------|------|-------------|--------------|--------------|---------|
| 1      | 18.017        | BB   | 0.4878      | 4.87470e4    | 1580.82031   | 57.2661 |
| 2      | 27.087        | BB   | 0.7093      | 3.63767e4    | 792.74335    | 42.7339 |

Totals : 8.51237e4 2373.56366

\*\*\* End of Report \*\*\*

2) (3R,4R)-9a (Table 2, entry 7)

Sample Name: BL-9-84

```

=====
Acq. Operator   :                               Seq. Line :    5
Acq. Instrument : Instrument 1                 Location  : Vial 61
Injection Date  : 4/25/2018 9:00:14 PM        Inj       :    1
                                                Inj Volume: 5.0 µl

Acq. Method     : C:\CHEM32\1\DATA\GACHEON\DEF_LC 2018-04-25 17-53-30\1.M
Last changed    : 4/25/2018 5:53:28 PM
Analysis Method : C:\CHEM32\1\METHODS\DEF_LC.M
Last changed    : 7/3/2019 8:01:46 PM by SYSTEM
                (modified after loading)
Sample Info     : CHIRALPAK AD-3, Hex/EtOH=60/40, Flow rate:1ml/min,
                Sample conc.: 1.2mg/mL, Temp.:RT
    
```

Additional Info : Peak(s) manually integrated

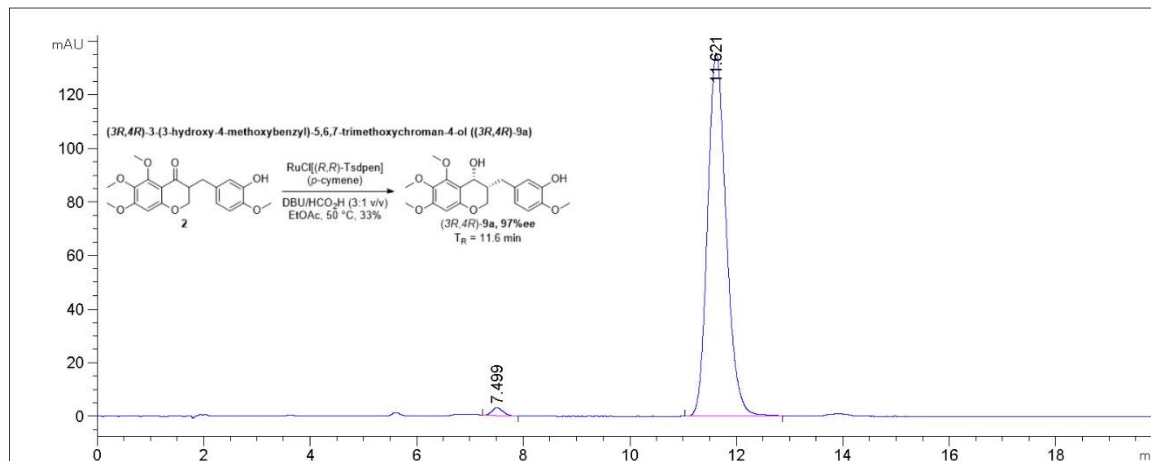

Area Percent Report

```

Sorted By      :      Signal
Multiplier     :      1.0000
Dilution       :      1.0000
Do not use Multiplier & Dilution Factor with ISTDs
    
```

Signal 1: DAD1 E, Sig=280,16 Ref=360,100

| Peak # | RetTime [min] | Type | Width [min] | Area [mAU*s] | Height [mAU] | Area %  |
|--------|---------------|------|-------------|--------------|--------------|---------|
| 1      | 7.499         | BB   | 0.2191      | 41.94565     | 2.89343      | 1.2660  |
| 2      | 11.621        | BB   | 0.3718      | 3271.36182   | 135.45758    | 98.7340 |

Totals : 3313.30746 138.35101

\*\*\* End of Report \*\*\*

### 3) (3R,4R)-9a (Table 2, entry 8)

Sample Name: BL-9-8S

```

=====
Acq. Operator   :                               Seq. Line :    9
Acq. Instrument : Instrument 1                 Location  : Vial 65
Injection Date  : 4/26/2018 12:05:45 AM      Inj       :    1
                                                Inj Volume: 5.0 µl

Acq. Method    : C:\CHEM32\1\DATA\GACHEON\DEF_LC 2018-04-25 17-53-30\1.M
Last changed   : 4/25/2018 5:53:28 PM
Analysis Method: C:\CHEM32\1\METHODS\DEF_LC.M
Last changed   : 7/3/2019 8:01:02 PM by SYSTEM
                (modified after loading)

Sample Info    : CHIRALPAK AD-3, Hex/EtOH=60/40, Flow rate:1ml/min,
                Sample conc.: 1.2mg/mL, Temp.:RT
    
```

Additional Info : Peak(s) manually integrated

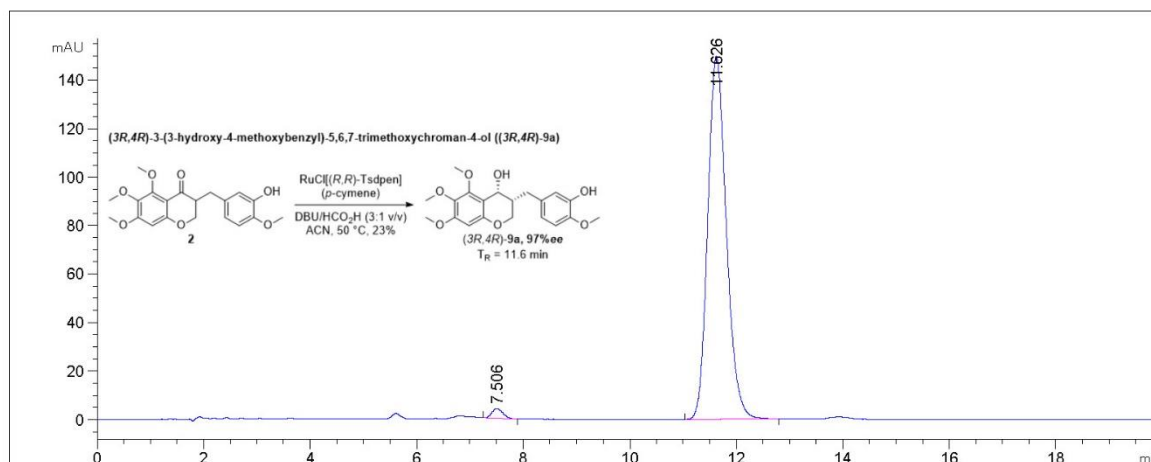

#### Area Percent Report

```

Sorted By      :      Signal
Multiplier    :      1.0000
Dilution      :      1.0000
Do not use Multiplier & Dilution Factor with ISTDs
    
```

Signal 1: DAD1 E, Sig=280,16 Ref=360,100

| Peak # | RetTime [min] | Type | Width [min] | Area [mAU*s] | Height [mAU] | Area %  |
|--------|---------------|------|-------------|--------------|--------------|---------|
| 1      | 7.506         | BB   | 0.2131      | 57.09267     | 4.03495      | 1.5537  |
| 2      | 11.626        | BB   | 0.3718      | 3617.57837   | 149.74373    | 98.4463 |

Totals : 3674.67104 153.77868

\*\*\* End of Report \*\*\*

#### 4) (3R,4R)-9a (Table 2, entry 9)

Sample Name: BL-120-2

```

=====
Acq. Operator   : DAICEL JHJIN                      Seq. Line :    4
Acq. Instrument : Instrument 1                      Location  : Vial 94
Injection Date  : 6/8/2018 6:03:53 AM              Inj       :    1
                                                    Inj Volume: 5.000 µl

Acq. Method     : C:\HPCHEM\1\METHODS\1.M
Last changed    : 6/8/2018 4:57:47 AM by DAICEL JHJIN
Analysis Method : C:\CHEM32\1\METHODS\DEF_LC.M
Last changed    : 7/3/2019 8:00:12 PM by SYSTEM
                (modified after loading)
Additional Info  : Peak(s) manually integrated
=====
  
```

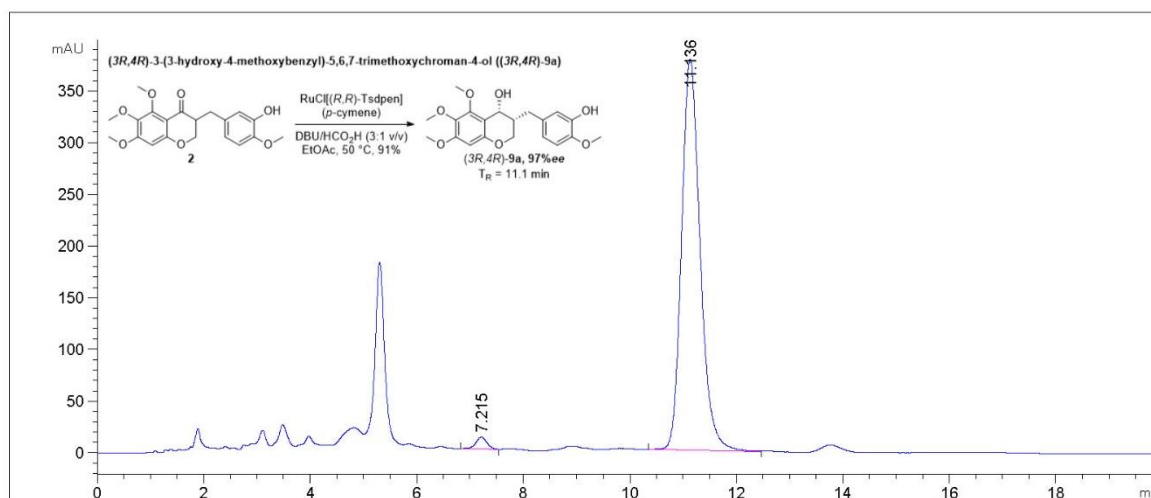

#### Area Percent Report

```

Sorted By      : Signal
Multiplier     : 1.0000
Dilution       : 1.0000
Do not use Multiplier & Dilution Factor with ISTDs
  
```

Signal 1: MWD1 A, Sig=215,4 Ref=360,100

| Peak # | RetTime [min] | Type | Width [min] | Area [mAU*s] | Height [mAU] | Area %  |
|--------|---------------|------|-------------|--------------|--------------|---------|
| 1      | 7.215         | BB   | 0.2126      | 163.92651    | 11.47643     | 1.7662  |
| 2      | 11.136        | BV   | 0.3694      | 9117.44238   | 377.95490    | 98.2338 |

Totals : 9281.36890 389.43132

\*\*\* End of Report \*\*\*



### 5) (3R,4R)-9a (Table 2, entry 10)

Sample Name: mhy 4-74-R

```

=====
Acq. Operator   : JHJIN                               Seq. Line :    1
Acq. Instrument : Instrument 1                         Location  : Vial 1
Injection Date  : 12/4/2018 4:15:43 PM                Inj       :    1
                                                    Inj Volume: 5.0 µl

Acq. Method     : C:\CHEM32\1\DATA\DEF_LC 2018-12-04 15-43-49\1.M
Last changed    : 12/4/2018 3:43:47 PM by JHJIN
Analysis Method : C:\CHEM32\1\METHODS\DEF_LC.M
Last changed    : 7/3/2019 8:11:32 PM by SYSTEM
                (modified after loading)

Sample Info     : CHIRALPAK AD-3
                Hex/EtOH=60/40
                Flow rate:0.5ml/min
    
```

Additional Info : Peak(s) manually integrated

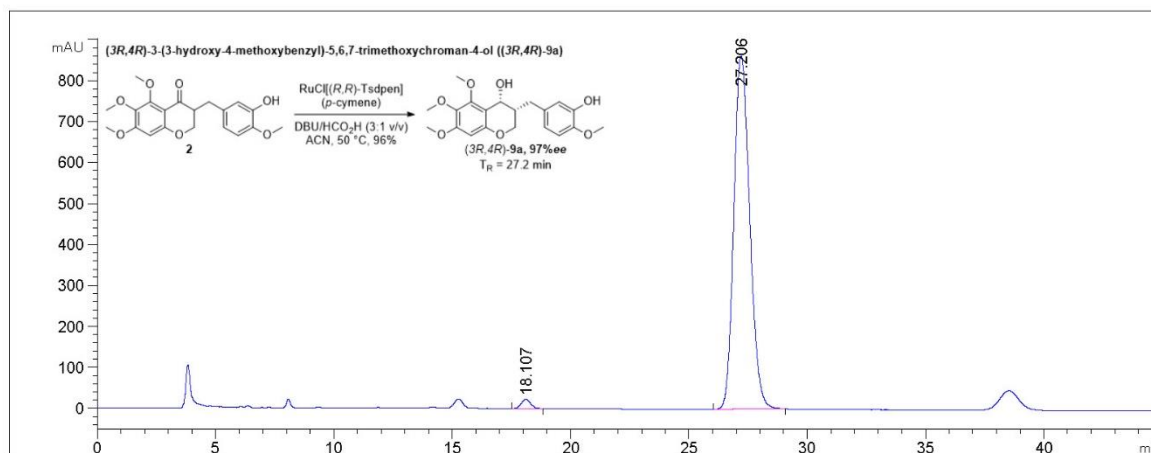

#### Area Percent Report

```

Sorted By      :      Signal
Multiplier     :      1.0000
Dilution      :      1.0000
Do not use Multiplier & Dilution Factor with ISTDs
    
```

Signal 1: DAD1 C, Sig=210,8 Ref=360,100

| Peak # | RetTime [min] | Type | Width [min] | Area [mAU*s] | Height [mAU] | Area %  |
|--------|---------------|------|-------------|--------------|--------------|---------|
| 1      | 18.107        | BB   | 0.3876      | 628.83606    | 22.67378     | 1.5413  |
| 2      | 27.206        | BB   | 0.7115      | 4.01703e4    | 862.27692    | 98.4587 |

Totals : 4.07991e4 884.95070

\*\*\* End of Report \*\*\*

## 6) (3S,4S)-9a (Table 2, entry 11)

Sample Name: mhy 4-74-5

```

=====
Acq. Operator   : JHJIN                               Seq. Line :    2
Acq. Instrument : Instrument 1                         Location  : Vial 2
Injection Date  : 12/4/2018 5:07:46 PM                Inj       :    1
                                                    Inj Volume: 5.0 µl

Acq. Method    : C:\CHEM32\1\DATA\DEF_LC 2018-12-04 15-43-49\1.M
Last changed   : 12/4/2018 3:43:47 PM by JHJIN
Analysis Method: C:\CHEM32\1\METHODS\DEF_LC.M
Last changed   : 7/3/2019 8:15:28 PM by SYSTEM
                (modified after loading)
Sample Info    : CHIRALPAK AD-3
                Hex/EtOH=60/40
                Flow rate:0.5ml/min
    
```

Additional Info : Peak(s) manually integrated

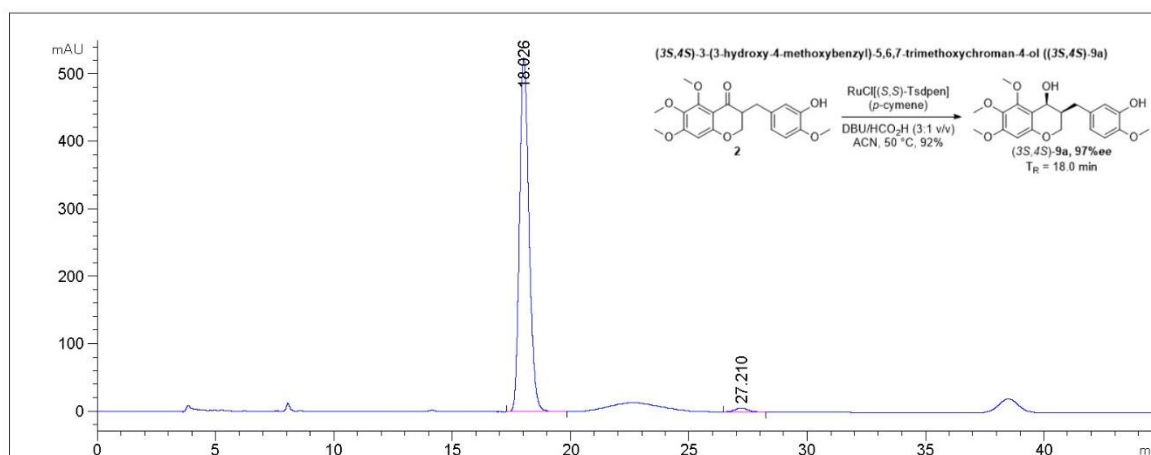

### Area Percent Report

```

Sorted By      :      Signal
Multiplier     :      1.0000
Dilution       :      1.0000
Do not use Multiplier & Dilution Factor with ISTDs
    
```

Signal 1: DAD1 A, Sig=230,8 Ref=360,100

| Peak # | RetTime [min] | Type | Width [min] | Area [mAU*s] | Height [mAU] | Area %  |
|--------|---------------|------|-------------|--------------|--------------|---------|
| 1      | 18.026        | BB   | 0.4294      | 1.46251e4    | 524.37988    | 98.3925 |
| 2      | 27.210        | BB   | 0.5127      | 238.94234    | 5.58993      | 1.6075  |

Totals : 1.48640e4 529.96981

\*\*\* End of Report \*\*\*

**7) (3R,4R)-9c (Table 3, entry 3)**

Sample Name: BL-9-11-2

```

=====
Acq. Operator   :                               Seq. Line : 10
Acq. Instrument : Instrument 1                 Location  : Vial 66
Injection Date  : 4/26/2018 12:52:07 AM      Inj       : 1
                                                Inj Volume: 5.0 µl

Acq. Method     : C:\CHEM32\1\DATA\GACHEON\DEF_LC 2018-04-25 17-53-30\1.M
Last changed    : 4/25/2018 5:53:28 PM
Analysis Method : C:\CHEM32\1\METHODS\DEF_LC.M
Last changed    : 7/3/2019 8:25:23 PM by SYSTEM
                (modified after loading)
Sample Info     : CHIRALPAK AD-3, Hex/EtOH=60/40, Flow rate:1ml/min,
                Sample conc.: 1.2mg/mL, Temp.:RT
    
```

Additional Info : Peak(s) manually integrated

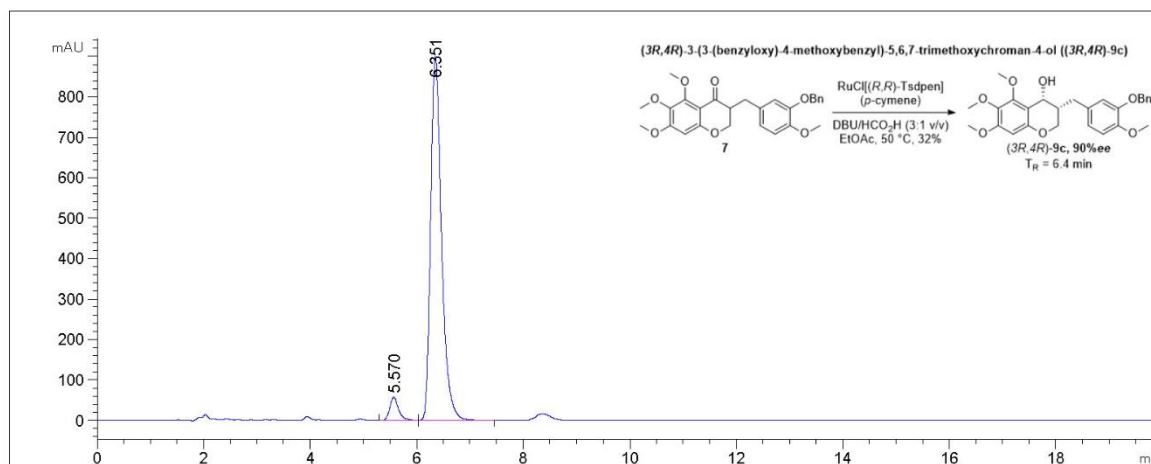

Area Percent Report

```

Sorted By      : Signal
Multiplier     : 1.0000
Dilution       : 1.0000
Do not use Multiplier & Dilution Factor with ISTDs
    
```

Signal 1: DAD1 D, Sig=230,16 Ref=360,100

| Peak # | RetTime [min] | Type | Width [min] | Area [mAU*s] | Height [mAU] | Area %  |
|--------|---------------|------|-------------|--------------|--------------|---------|
| 1      | 5.570         | BV   | 0.1755      | 652.27429    | 56.99644     | 4.8632  |
| 2      | 6.351         | VB   | 0.2174      | 1.27602e4    | 900.17999    | 95.1368 |

Totals : 1.34124e4 957.17644

\*\*\* End of Report \*\*\*

### 8) (3R,4R)-9c (Table 3, entry 4)

Sample Name: BL-9-89

```

=====
Acq. Operator   :                               Seq. Line :    7
Acq. Instrument : Instrument 1                  Location  : Vial 63
Injection Date  : 4/25/2018 10:32:58 PM      Inj       :    1
                                                Inj Volume: 5.0 µl

Acq. Method     : C:\CHEM32\1\DATA\GACHEON\DEF_LC 2018-04-25 17-53-30\1.M
Last changed    : 4/25/2018 5:53:28 PM
Analysis Method : C:\CHEM32\1\METHODS\DEF_LC.M
Last changed    : 7/3/2019 8:27:11 PM by SYSTEM
                (modified after loading)
Sample Info     : CHIRALPAK AD-3, Hex/EtOH=60/40, Flow rate:1ml/min,
                Sample conc.: 1.2mg/mL, Temp.:RT
    
```

Additional Info : Peak(s) manually integrated

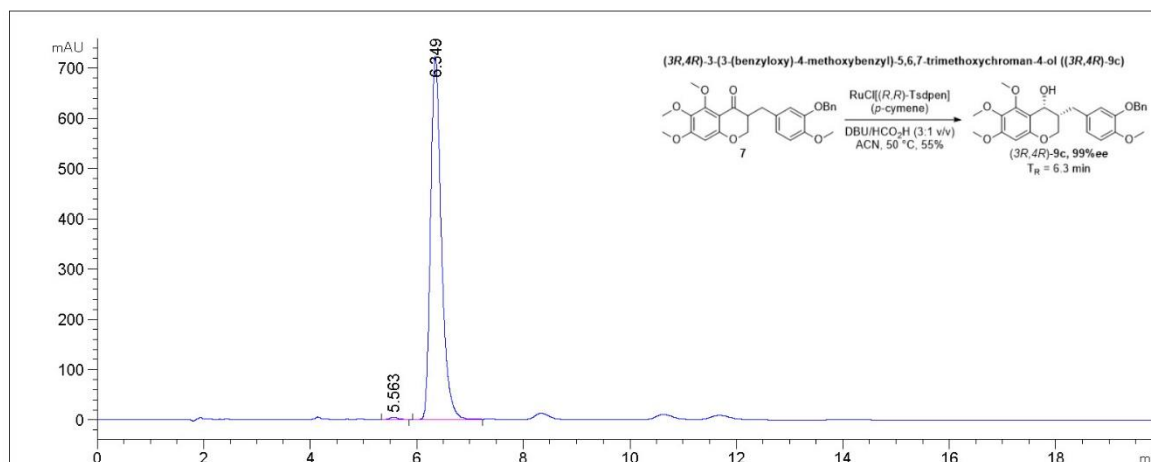

#### Area Percent Report

```

Sorted By      :      Signal
Multiplier     :      1.0000
Dilution       :      1.0000
Do not use Multiplier & Dilution Factor with ISTDs
    
```

Signal 1: DAD1 D, Sig=230,16 Ref=360,100

| Peak # | RetTime [min] | Type | Width [min] | Area [mAU*s] | Height [mAU] | Area %  |
|--------|---------------|------|-------------|--------------|--------------|---------|
| 1      | 5.563         | BB   | 0.1682      | 50.52208     | 4.67088      | 0.4951  |
| 2      | 6.349         | BB   | 0.2159      | 1.01534e4    | 722.93781    | 99.5049 |

Totals :                    1.02039e4    727.60868

\*\*\* End of Report \*\*\*

**9) (3R,4R)-9c (Table 3, entry 6)**

Sample Name: BL-9-90

```

=====
Acq. Operator   :                               Seq. Line :    8
Acq. Instrument : Instrument 1                 Location  : Vial 64
Injection Date  : 4/25/2018 11:19:22 PM      Inj       :    1
                                                Inj Volume: 5.0 µl

Acq. Method     : C:\CHEM32\1\DATA\GACHEON\DEF_LC 2018-04-25 17-53-30\1.M
Last changed    : 4/25/2018 5:53:28 PM
Analysis Method : C:\CHEM32\1\METHODS\DEF_LC.M
Last changed    : 7/3/2019 8:28:22 PM by SYSTEM
                (modified after loading)
Sample Info     : CHIRALPAK AD-3, Hex/EtOH=60/40, Flow rate:1ml/min,
                Sample conc.: 1.2mg/mL, Temp.:RT
    
```

Additional Info : Peak(s) manually integrated

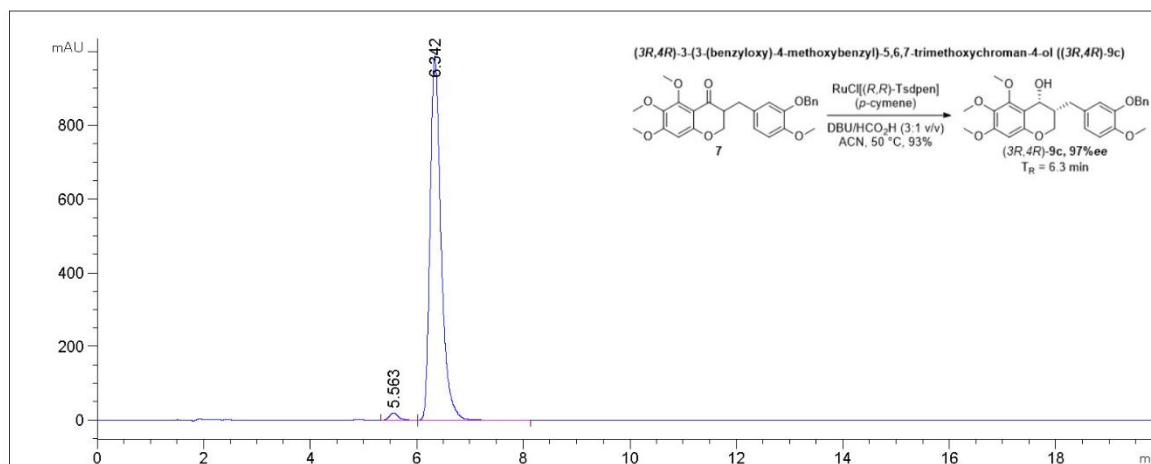

Area Percent Report

```

Sorted By      :      Signal
Multiplier     :      1.0000
Dilution       :      1.0000
Do not use Multiplier & Dilution Factor with ISTDs
    
```

Signal 1: DAD1 D, Sig=230,16 Ref=360,100

| Peak # | RetTime [min] | Type | Width [min] | Area [mAU*s] | Height [mAU] | Area %  |
|--------|---------------|------|-------------|--------------|--------------|---------|
| 1      | 5.563         | BV   | 0.1754      | 227.40402    | 19.88769     | 1.5827  |
| 2      | 6.342         | VB   | 0.2191      | 1.41409e4    | 987.36163    | 98.4173 |

Totals : 1.43683e4 1007.24932

\*\*\* End of Report \*\*\*

### 10) (3S,4S)-9c (Table 3, entry 7)

Sample Name: BL-9-101

```

=====
Acq. Operator   : DAICEL JHJIN                      Seq. Line : 10
Acq. Instrument : Instrument 1                      Location  : Vial 20
Injection Date  : 5/28/2018 5:59:15 PM             Inj       : 2
                                                    Inj Volume: 5.000 µl

Acq. Method     : C:\HPCHEM\1\METHODS\1.M
Last changed    : 5/28/2018 11:02:19 AM by DAICEL JHJIN
Analysis Method : C:\CHEM32\1\METHODS\DEF_LC.M
Last changed    : 7/4/2019 6:16:18 PM by SYSTEM
                  (modified after loading)
Sample Info     : CHIRALPAK AD-3, (4.6*150 mm)
                  MP: Hex/EtOH=60/40
                  Flow rate:1ml/min
    
```

Additional Info : Peak(s) manually integrated

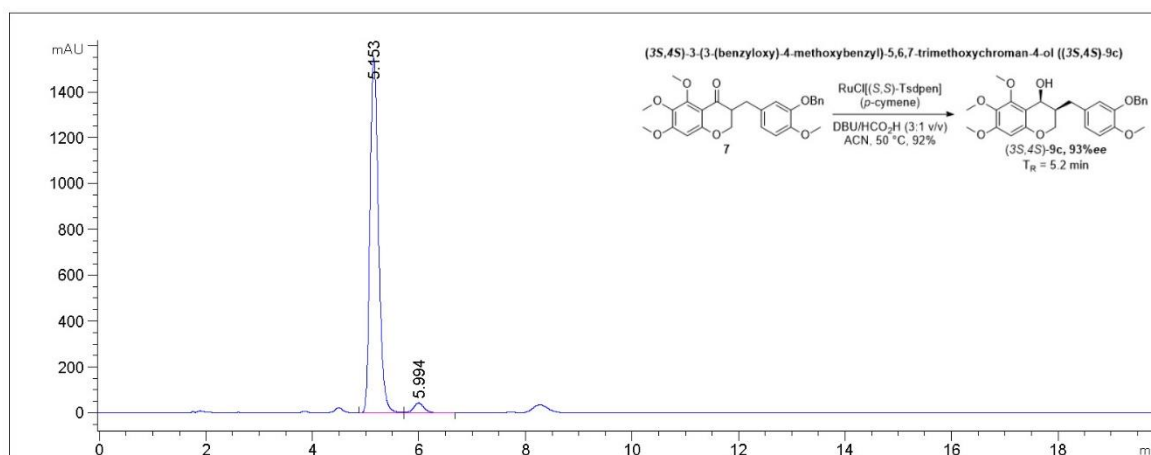

#### Area Percent Report

```

Sorted By      : Signal
Multiplier     : 1.0000
Dilution       : 1.0000
Do not use Multiplier & Dilution Factor with ISTDs
    
```

Signal 1: MWD1 D, Sig=230,4 Ref=360,100

| Peak # | RetTime [min] | Type | Width [min] | Area [mAU*s] | Height [mAU] | Area %  |
|--------|---------------|------|-------------|--------------|--------------|---------|
| 1      | 5.153         | BV   | 0.1709      | 1.71049e4    | 1547.80542   | 96.7041 |
| 2      | 5.994         | VB   | 0.2117      | 582.96771    | 42.07258     | 3.2959  |

Totals : 1.76879e4 1589.87800

\*\*\* End of Report \*\*\*

# 11) (3R,4R)-9d (Table 3, entry 8)

Sample Name: MH 4-58

```

=====
Acq. Operator   : JHJIN                      Seq. Line :    1
Acq. Instrument : Instrument 1                Location  : Vial 1
Injection Date  : 10/11/2018 3:57:57 PM      Inj       :    1
                                           Inj Volume: 5.0 µl

Acq. Method     : C:\CHEM32\1\DATA\DAICEL 2018-10-11 15-51-49\1.M
Last changed    : 10/11/2018 3:19:41 PM by JHJIN
Analysis Method : C:\CHEM32\1\METHODS\DEF_LC.M
Last changed    : 7/3/2019 8:28:22 PM by SYSTEM
                 (modified after loading)

Sample Info     : CHIRALPAK AD-3
                 Hex/EtOH=60/40
                 Flow rate:1 ml/min
    
```

Additional Info : Peak(s) manually integrated

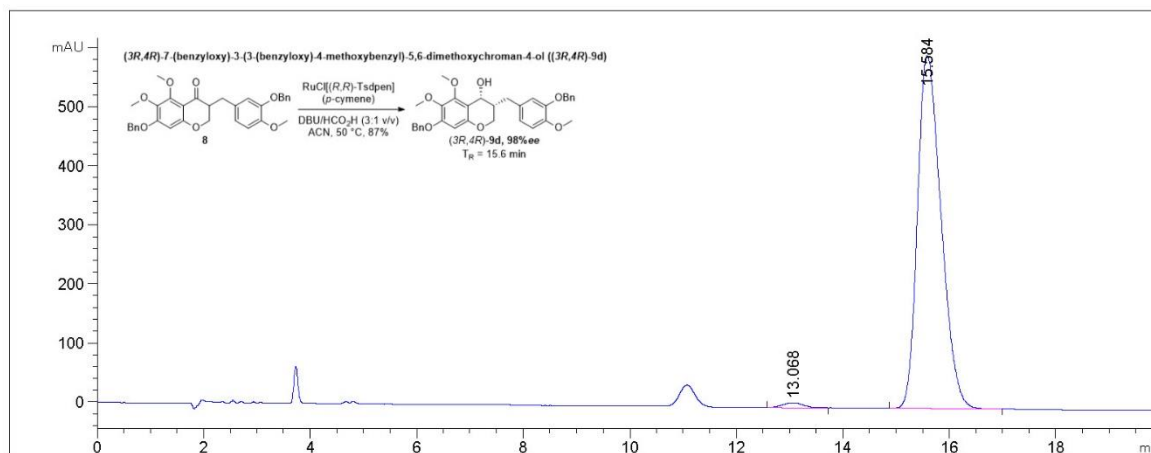

## Area Percent Report

```

Sorted By      :      Signal
Multiplier     :      1.0000
Dilution       :      1.0000
Do not use Multiplier & Dilution Factor with ISTDs
    
```

Signal 1: DAD1 A, Sig=230,8 Ref=360,100

| Peak # | RetTime [min] | Type | Width [min] | Area [mAU*s] | Height [mAU] | Area %  |
|--------|---------------|------|-------------|--------------|--------------|---------|
| 1      | 13.068        | BB   | 0.3252      | 221.99231    | 8.48510      | 1.1935  |
| 2      | 15.584        | BB   | 0.4727      | 1.83782e4    | 597.70709    | 98.8065 |

Totals : 1.86002e4 606.19219

\*\*\* End of Report \*\*\*

## 12) (3S,4S)-9d (Table 3, entry 9)

Sample Name: BL-9-110

```

=====
Acq. Operator   : DAICEL JHJIN                      Seq. Line : 12
Acq. Instrument : Instrument 1                      Location  : Vial 22
Injection Date  : 5/28/2018 7:24:45 PM             Inj       : 2
                                                    Inj Volume: 5.000 µl

Acq. Method     : C:\HPCHEM\1\METHODS\1.M
Last changed    : 5/28/2018 11:02:19 AM by DAICEL JHJIN
Analysis Method : C:\CHEM32\1\METHODS\DEF_LC.M
Last changed    : 7/4/2019 6:25:58 PM by SYSTEM
                (modified after loading)
Sample Info     : CHIRALPAK AD-3, (4.6*150 mm)
                MP: Hex/EtOH=60/40
                Flow rate:1ml/min
    
```

Additional Info : Peak(s) manually integrated

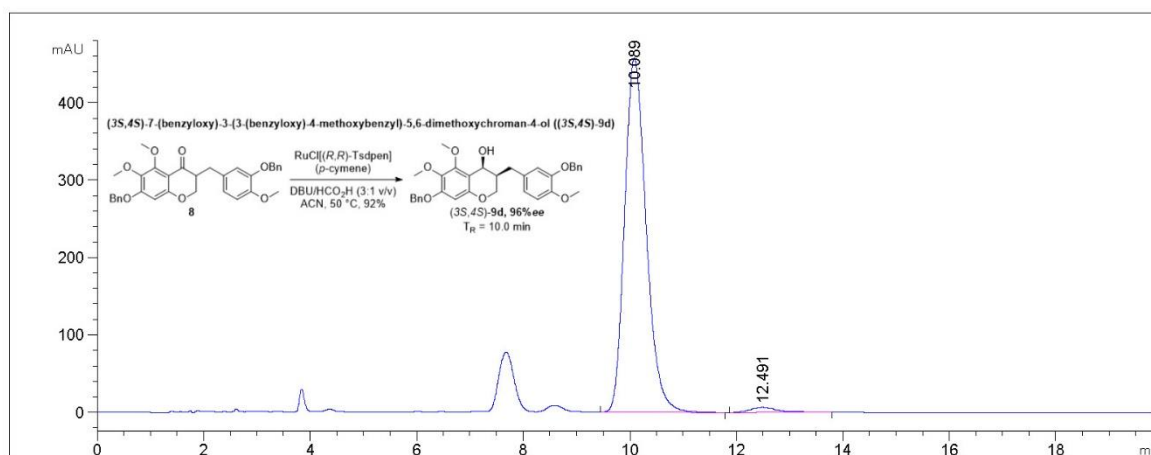

### Area Percent Report

```

Sorted By      : Signal
Multiplier     : 1.0000
Dilution       : 1.0000
Do not use Multiplier & Dilution Factor with ISTDs
    
```

Signal 1: MWD1 D, Sig=230,4 Ref=360,100

| Peak # | RetTime [min] | Type | Width [min] | Area [mAU*s] | Height [mAU] | Area %  |
|--------|---------------|------|-------------|--------------|--------------|---------|
| 1      | 10.089        | BB   | 0.4355      | 1.28379e4    | 457.35287    | 98.2652 |
| 2      | 12.491        | BB   | 0.4720      | 226.64784    | 6.29606      | 1.7348  |

Totals : 1.30646e4 463.64894

\*\*\* End of Report \*\*\*



13) (rac)-7 obtained from 2

Sample Name: SH18053

```

=====
Acq. Operator   : DAICEL JHJIN                Seq. Line :    2
Acq. Instrument : Instrument 1                Location  : Vial 41
Injection Date  : 5/31/2018 3:15:41 AM      Inj       :    1
                                           Inj Volume: 5.000 µl

Acq. Method     : C:\HPCHEM\1\METHODS\1.M
Last changed    : 5/31/2018 3:03:21 AM by DAICEL JHJIN
                 (modified after loading)
Analysis Method : C:\CHEM32\1\METHODS\DEF_LC.M
Last changed    : 7/4/2019 6:16:18 PM by SYSTEM
                 (modified after loading)
Sample Info     : CHIRALPAK AD-3, ACN/MeOH=50/50
                 Flow rate:0.5ml/min
    
```

Additional Info : Peak(s) manually integrated

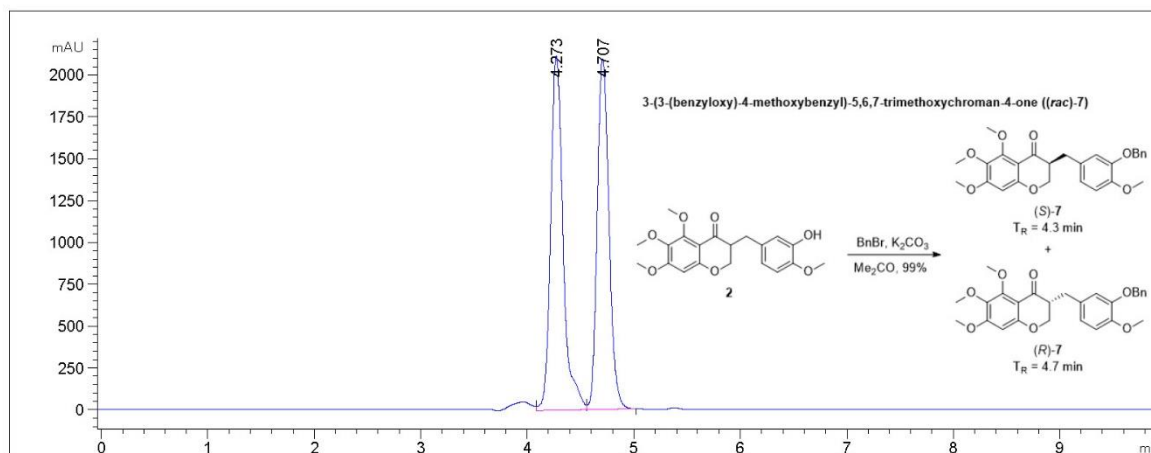

Area Percent Report

```

Sorted By      :      Signal
Multiplier     :      1.0000
Dilution      :      1.0000
Do not use Multiplier & Dilution Factor with ISTDs
    
```

Signal 1: MWD1 D, Sig=230,4 Ref=360,100

| Peak # | RetTime [min] | Type | Width [min] | Area [mAU*s] | Height [mAU] | Area %  |
|--------|---------------|------|-------------|--------------|--------------|---------|
| 1      | 4.273         | VV   | 0.1248      | 1.72052e4    | 2117.92773   | 51.6316 |
| 2      | 4.707         | VB   | 0.1198      | 1.61178e4    | 2094.03467   | 48.3684 |

Totals : 3.33230e4 4211.96240

\*\*\* End of Report \*\*\*

**14) (R)-7 obtained from (3R,4R)-9c (Scheme 3)**

Sample Name: SH18053

```

=====
Acq. Operator   : DAICEL JHJIN                      Seq. Line :    2
Acq. Instrument : Instrument 1                      Location  : Vial 11
Injection Date  : 5/29/2018 9:47:34 AM             Inj       :    2
                                                    Inj Volume: 5.000 µl

Acq. Method     : C:\HPCHEM\1\METHODS\1.M
Last changed    : 5/29/2018 7:50:02 AM by DAICEL JHJIN
Analysis Method : C:\CHEM32\1\METHODS\DEF_LC.M
Last changed    : 7/4/2019 2:03:54 PM by SYSTEM
                (modified after loading)
Sample Info     : CHIRALPAK AD-3, ACN/MeOH=50/50
                Flow rate:0.5ml/min
    
```

Additional Info : Peak(s) manually integrated

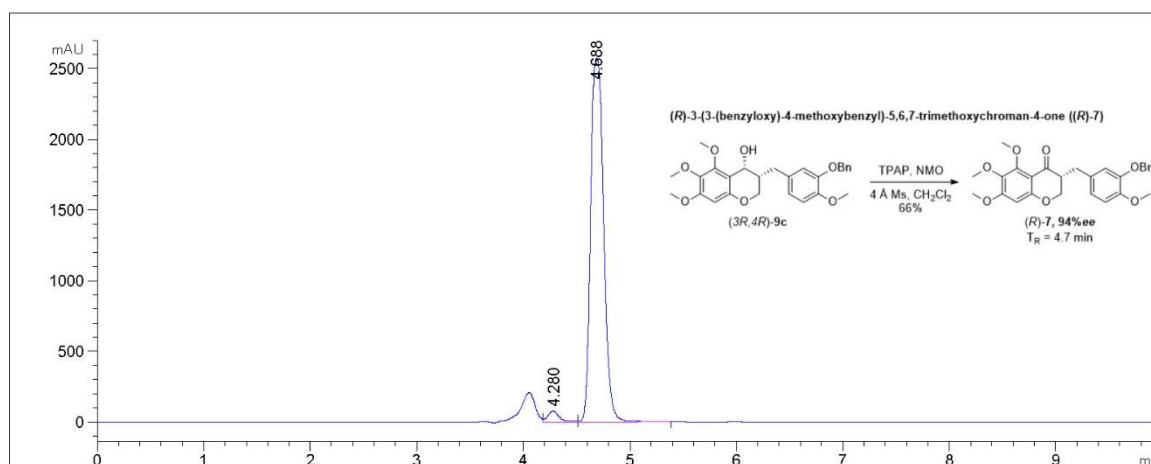

Area Percent Report

```

Sorted By      :      Signal
Multiplier     :      1.0000
Dilution       :      1.0000
Do not use Multiplier & Dilution Factor with ISTDs
    
```

Signal 1: MWD1 D, Sig=230,4 Ref=360,100

| Peak # | RetTime [min] | Type | Width [min] | Area [mAU*s] | Height [mAU] | Area %  |
|--------|---------------|------|-------------|--------------|--------------|---------|
| 1      | 4.280         | VV   | 0.1174      | 666.17273    | 83.21376     | 2.9571  |
| 2      | 4.688         | VB   | 0.1350      | 2.18620e4    | 2576.28809   | 97.0429 |

Totals : 2.25282e4 2659.50185

\*\*\* End of Report \*\*\*

15) (R)-2 obtained from (R)-7 (Scheme 3)

Sample Name: SH18060

```

=====
Acq. Operator   : DAICEL JHJIN                Seq. Line :    6
Acq. Instrument : Instrument 1                Location  : Vial 16
Injection Date  : 5/29/2018 2:00:01 PM       Inj       :    2
                                           Inj Volume: 5.000 µl

Acq. Method    : C:\HPCHEM\1\METHODS\1.M
Last changed   : 5/29/2018 7:50:02 AM by DAICEL JHJIN
Analysis Method : C:\CHEM32\1\METHODS\DEF_LC.M
Last changed   : 7/4/2019 2:05:23 PM by SYSTEM
                (modified after loading)
Sample Info    : CHIRALPAK AD-3, ACN/MeOH=50/50
                Flow rate:0.5ml/min
    
```

Additional Info : Peak(s) manually integrated

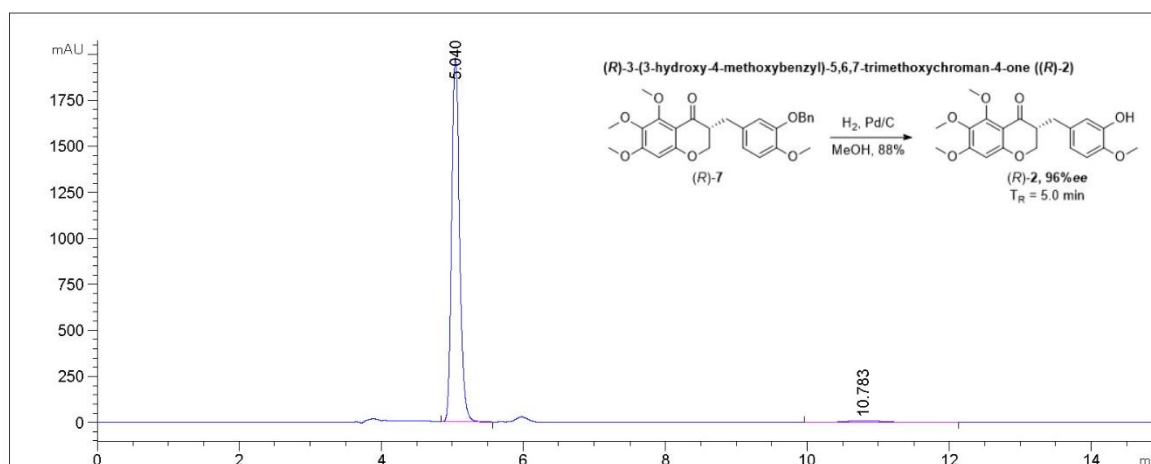

Area Percent Report

```

Sorted By      :      Signal
Multiplier    :      1.0000
Dilution      :      1.0000
Do not use Multiplier & Dilution Factor with ISTDs
    
```

Signal 1: MWD1 D, Sig=230,4 Ref=360,100

| Peak # | RetTime [min] | Type | Width [min] | Area [mAU*s] | Height [mAU] | Area %  |
|--------|---------------|------|-------------|--------------|--------------|---------|
| 1      | 5.040         | BB   | 0.1234      | 1.54880e4    | 1977.34839   | 97.9477 |
| 2      | 10.783        | BB   | 0.5320      | 324.52756    | 7.54251      | 2.0523  |

Totals : 1.58125e4 1984.89090

\*\*\* End of Report \*\*\*

16) (S)-2 obtained from (S)-7 (Scheme 3)

Sample Name: SH18022

```

=====
Acq. Operator   :                               Seq. Line :    1
Acq. Instrument : Instrument 1                   Location  : Vial 21
Injection Date  : 4/27/2018 1:25:14 PM          Inj       :    1
                                                    Inj Volume: 5.0 µl

Acq. Method     : C:\CHEM32\1\DATA\GACHEON\DEF_LC 2018-04-27 13-23-59\1.M
Last changed    : 4/27/2018 1:23:56 PM
Analysis Method : C:\CHEM32\1\METHODS\DEF_LC.M
Last changed    : 7/4/2019 6:29:07 PM by SYSTEM
                (modified after loading)
Sample Info     : CHIRALPAK AD-3, ACN/MeOH=50/50, Flow rate:1ml/min,
                Sample conc.: 1.2mg/mL, Temp.:RT
    
```

Additional Info : Peak(s) manually integrated

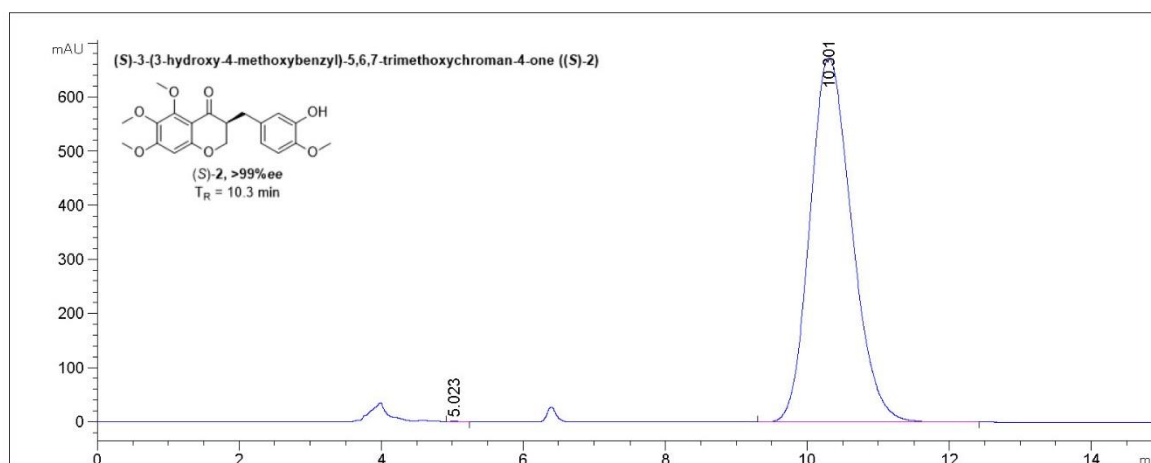

Area Percent Report

```

Sorted By      :      Signal
Multiplier     :      1.0000
Dilution       :      1.0000
Do not use Multiplier & Dilution Factor with ISTDs
    
```

Signal 1: DAD1 D, Sig=230,16 Ref=360,100

| Peak # | RetTime [min] | Type | Width [min] | Area [mAU*s] | Height [mAU] | Area %  |
|--------|---------------|------|-------------|--------------|--------------|---------|
| 1      | 5.023         | VB   | 0.1247      | 11.79457     | 1.33968      | 0.0430  |
| 2      | 10.301        | BB   | 0.6319      | 2.74382e4    | 672.62732    | 99.9570 |

Totals : 2.74500e4 673.96700

\*\*\* End of Report \*\*\*

## 17) 4 stereoisomers of 3

Sample Name: (rac)-D,L-3

```

=====
Acq. Operator   : LCW                               Seq. Line : 1
Acq. Instrument : Instrument 1                       Location  : Vial 1
Injection Date  : 7/2/2019 6:06:59 PM              Inj       : 1
                                                    Inj Volume: 20.0 µl
Acq. Method     : C:\CHEM32\1\DATA\Gachon_190702\SCREENING 2019-07-02 18-05-25\Gachon_190626.
M
Last changed    : 7/2/2019 6:05:24 PM by LCW
Analysis Method : C:\CHEM32\1\METHODS\DEF_LC.M
Last changed    : 7/3/2019 8:50:27 PM by SYSTEM
                (modified after loading)
Additional Info  : Peak(s) manually integrated
=====
  
```

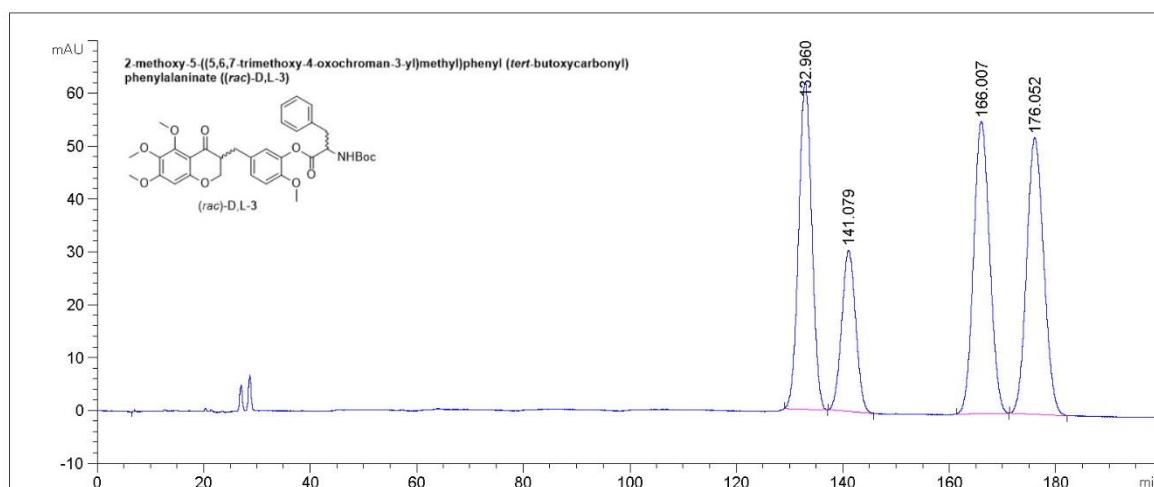

### Area Percent Report

```

Sorted By      : Signal
Multiplier     : 1.0000
Dilution       : 1.0000
Do not use Multiplier & Dilution Factor with ISTDs
  
```

Signal 1: DAD1 D, Sig=275,4 Ref=off

| Peak # | RetTime [min] | Type | Width [min] | Area [mAU*s] | Height [mAU] | Area %  |
|--------|---------------|------|-------------|--------------|--------------|---------|
| 1      | 132.960       | BB   | 2.0206      | 1.06450e4    | 61.95245     | 26.9653 |
| 2      | 141.079       | BB   | 2.1438      | 5569.94873   | 30.48312     | 14.1095 |
| 3      | 166.007       | BB   | 2.5011      | 1.15788e4    | 55.29359     | 29.3307 |
| 4      | 176.052       | BB   | 2.6557      | 1.16829e4    | 52.30924     | 29.5945 |

Totals : 3.94766e4 200.03840

\*\*\* End of Report \*\*\*

### 18) A mixture of (R,S)- and (S,S)-3

Sample Name: (rac)-L-3

```

=====
Acq. Operator   : LCW                               Seq. Line :   3
Acq. Instrument : Instrument 1                       Location  : Vial 3
Injection Date  : 7/3/2019 4:10:24 AM              Inj       :   1
                                                    Inj Volume: 20.0 µl
Acq. Method    : C:\CHEM32\1\DATA\Gachon_190702\SCREENING 2019-07-02 18-05-25\Gachon_190626.
M
Last changed   : 7/3/2019 8:15:57 AM by LCW
                (modified after loading)
Analysis Method : C:\CHEM32\1\METHODS\DEF_LC.M
Last changed   : 7/3/2019 8:53:22 PM by SYSTEM
                (modified after loading)
Additional Info : Peak(s) manually integrated
=====
  
```

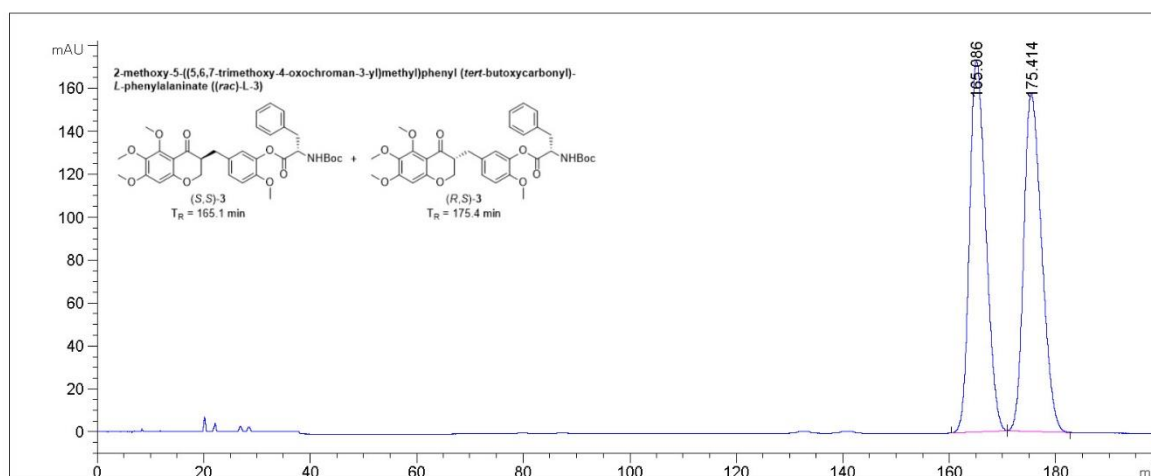

#### Area Percent Report

```

Sorted By      :      Signal
Multiplier     :      1.0000
Dilution       :      1.0000
Do not use Multiplier & Dilution Factor with ISTDs
  
```

Signal 1: DAD1 D, Sig=275,4 Ref=off

| Peak # | RetTime [min] | Type | Width [min] | Area [mAU*s] | Height [mAU] | Area %  |
|--------|---------------|------|-------------|--------------|--------------|---------|
| 1      | 165.086       | BB   | 2.7931      | 3.67797e4    | 173.50591    | 49.9848 |
| 2      | 175.414       | BB   | 2.9213      | 3.68021e4    | 157.77434    | 50.0152 |

Totals : 7.35818e4 331.28024

\*\*\* End of Report \*\*\*

# 19) A mixture of (R,R)- and (S,R)-3

Sample Name: (rac)-D-3

```

=====
Acq. Operator   : LCW                               Seq. Line :    2
Acq. Instrument : Instrument 1                       Location  : Vial 2
Injection Date  : 7/2/2019 11:08:40 PM              Inj       :    1
                                                    Inj Volume: 20.0 µl
Acq. Method     : C:\CHEM32\1\DATA\Gachon_190702\SCREENING 2019-07-02 18-05-25\Gachon_190626.
M
Last changed    : 7/2/2019 6:05:24 PM by LCW
Analysis Method : C:\CHEM32\1\METHODS\DEF_LC.M
Last changed    : 7/3/2019 8:50:27 PM by SYSTEM
                (modified after loading)
Additional Info : Peak(s) manually integrated
=====
  
```

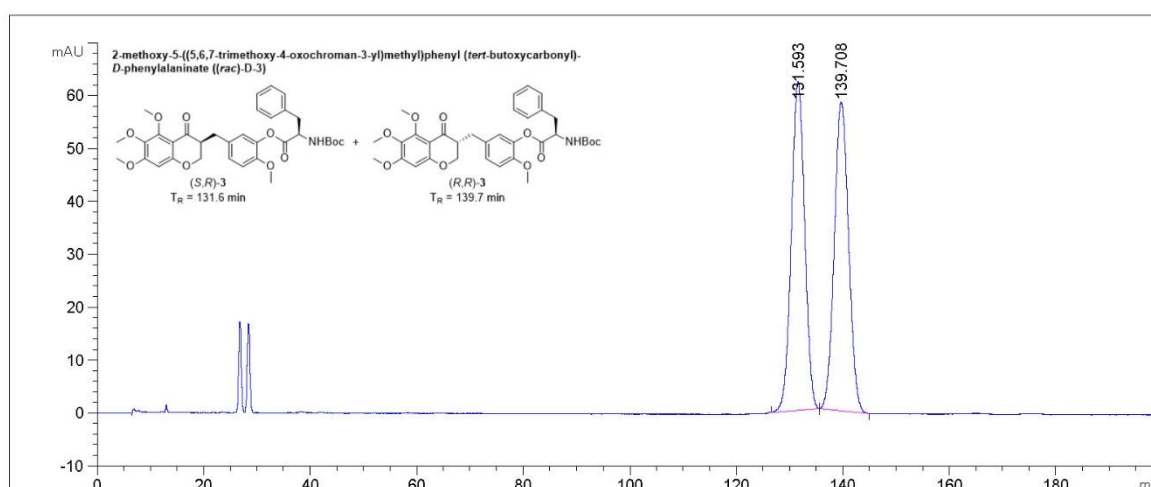

## Area Percent Report

```

Sorted By      : Signal
Multiplier     : 1.0000
Dilution       : 1.0000
Do not use Multiplier & Dilution Factor with ISTDs
  
```

Signal 1: DAD1 D, Sig=275,4 Ref=off

| Peak # | RetTime [min] | Type | Width [min] | Area [mAU*s] | Height [mAU] | Area %  |
|--------|---------------|------|-------------|--------------|--------------|---------|
| 1      | 131.593       | BB   | 2.1933      | 1.08212e4    | 62.21381     | 49.8012 |
| 2      | 139.708       | BB   | 2.1929      | 1.09076e4    | 58.40443     | 50.1988 |

Totals : 2.17289e4 120.61823

\*\*\* End of Report \*\*\*

20) (R,S)-3 obtained from (R)-2 (Scheme 3)

Sample Name: (R,S)-3

```

=====
Acq. Operator   : LCW                               Seq. Line :    4
Acq. Instrument : Instrument 1                       Location  : Vial 4
Injection Date  : 7/3/2019 8:17:47 AM              Inj       :    1
                                                    Inj Volume: 20.0 µl
Acq. Method    : C:\CHEM32\1\DATA\Gachon_190702\SCREENING 2019-07-02 18-05-25\Gachon_190626.
M
Last changed   : 7/3/2019 12:02:43 PM by LCW
                (modified after loading)
Analysis Method : C:\CHEM32\1\METHODS\DEF_LC.M
Last changed   : 7/3/2019 8:56:12 PM by SYSTEM
                (modified after loading)
Additional Info : Peak(s) manually integrated
=====
    
```

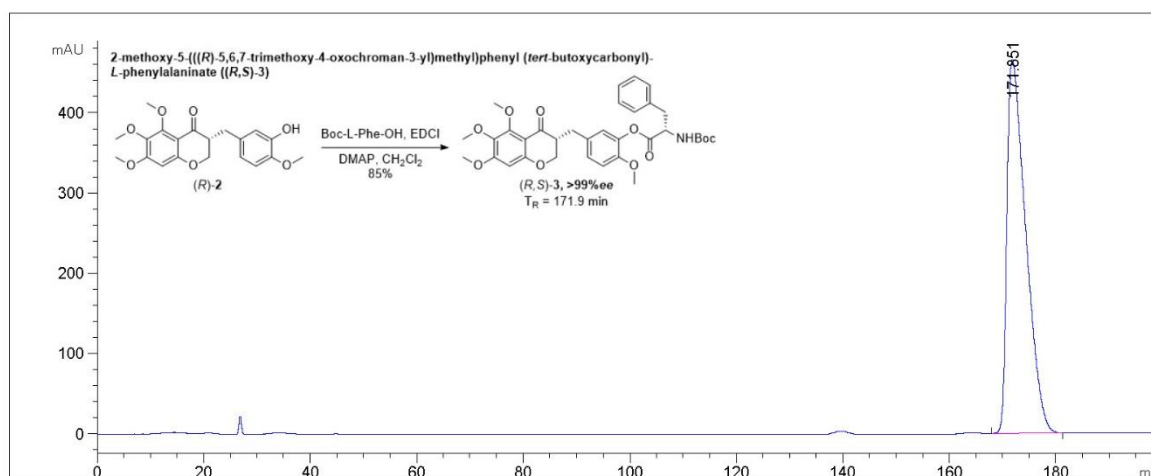

Area Percent Report

```

Sorted By      :      Signal
Multiplier     :      1.0000
Dilution       :      1.0000
Do not use Multiplier & Dilution Factor with ISTDs
    
```

Signal 1: DAD1 D, Sig=275,4 Ref=off

| Peak # | RetTime [min] | Type | Width [min] | Area [mAU*s] | Height [mAU] | Area %   |
|--------|---------------|------|-------------|--------------|--------------|----------|
| 1      | 171.851       | BB   | 3.2670      | 1.13915e5    | 465.82147    | 100.0000 |

Totals : 1.13915e5 465.82147

\*\*\* End of Report \*\*\*



21) (R,R)-3 obtained from (R)-2 (Scheme 3)

Sample Name: (R,R)-3

```

=====
Acq. Operator   : LCW                               Seq. Line :    5
Acq. Instrument : Instrument 1                       Location  : Vial 5
Injection Date  : 7/3/2019 12:29:30 PM              Inj       :    1
                                                    Inj Volume: 20.0 µl
Acq. Method     : C:\CHEM32\1\DATA\Gachon_190702\SCREENING 2019-07-02 18-05-25\Gachon_190626.
M
Last changed    : 7/3/2019 12:02:43 PM by LCW
                  (modified after loading)
Analysis Method : C:\CHEM32\1\METHODS\DEF_LC.M
Last changed    : 7/3/2019 8:59:40 PM by SYSTEM
                  (modified after loading)
Additional Info  : Peak(s) manually integrated
=====
  
```

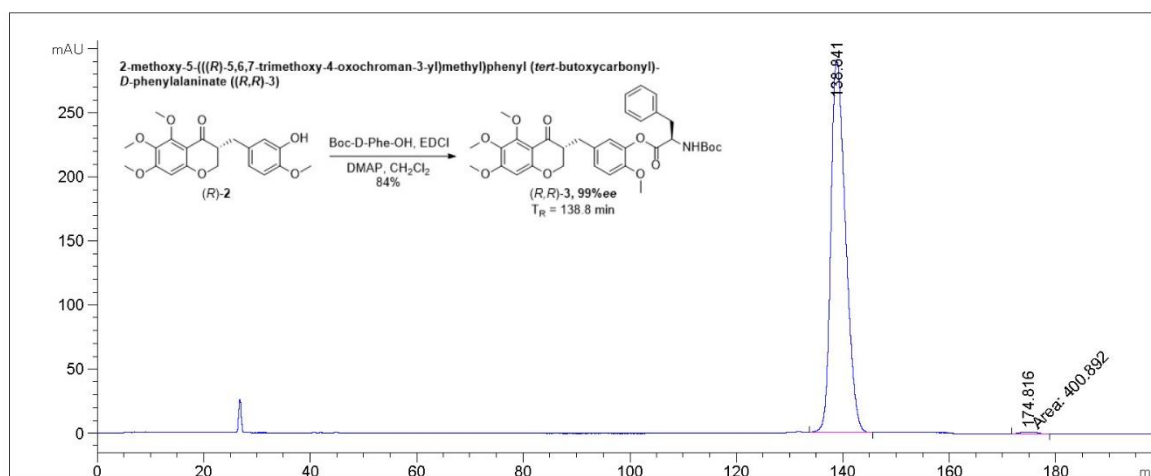

Area Percent Report

```

Sorted By      :      Signal
Multiplier     :      1.0000
Dilution       :      1.0000
Do not use Multiplier & Dilution Factor with ISTDs
  
```

Signal 1: DAD1 D, Sig=275,4 Ref=off

| Peak # | RetTime [min] | Type | Width [min] | Area [mAU*s] | Height [mAU] | Area %  |
|--------|---------------|------|-------------|--------------|--------------|---------|
| 1      | 138.841       | BB   | 2.7745      | 5.55820e4    | 291.23993    | 99.2839 |
| 2      | 174.816       | MM   | 3.9038      | 400.89243    | 1.71155      | 0.7161  |

Totals : 5.59828e4 292.95148

\*\*\* End of Report \*\*\*

22) (S,S)-3 obtained from (S)-2 (Scheme 3)

Sample Name: (S,S)-3

```

=====
Acq. Operator   : LCW                               Seq. Line :    6
Acq. Instrument : Instrument 1                       Location  : Vial 6
Injection Date  : 7/3/2019 4:41:14 PM              Inj       :    1
                                                    Inj Volume: 20.0 µl
Acq. Method     : C:\CHEM32\1\DATA\Gachon_190702\SCREENING 2019-07-02 18-05-25\Gachon_190626.
M
Last changed    : 7/3/2019 12:02:43 PM by LCW
                  (modified after loading)
Analysis Method : C:\CHEM32\1\METHODS\DEF_LC.M
Last changed    : 7/4/2019 1:58:48 PM by SYSTEM
                  (modified after loading)
Additional Info  : Peak(s) manually integrated
=====
    
```

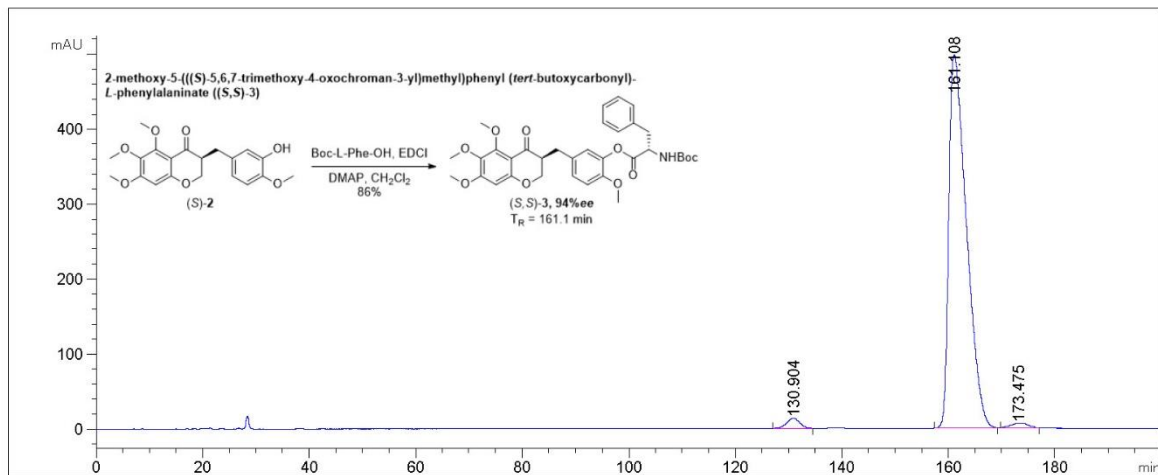

Area Percent Report

```

Sorted By      :      Signal
Multiplier     :      1.0000
Dilution       :      1.0000
Do not use Multiplier & Dilution Factor with ISTDs
    
```

Signal 1: DAD1 D, Sig=275,4 Ref=off

| Peak # | RetTime [min] | Type | Width [min] | Area [mAU*s] | Height [mAU] | Area %  |
|--------|---------------|------|-------------|--------------|--------------|---------|
| 1      | 130.904       | MM   | 2.8268      | 2312.83423   | 13.63641     | 1.9614  |
| 2      | 161.108       | BB   | 2.9841      | 1.14223e5    | 497.97366    | 96.8692 |
| 3      | 173.475       | MM   | 3.6686      | 1378.80200   | 6.26395      | 1.1693  |

Totals : 1.17915e5 517.87402

\*\*\* End of Report \*\*\*

**23) (S,R)-3 obtained from (S)-2 (Scheme 3)**

Sample Name: (S,R)-3

```

=====
Acq. Operator   : LCW                               Seq. Line :    7
Acq. Instrument : Instrument 1                       Location  : Vial 7
Injection Date  : 7/3/2019 8:52:55 PM              Inj       :    1
                                                    Inj Volume: 20.0 µl
Acq. Method     : C:\CHEM32\1\DATA\Gachon_190702\SCREENING 2019-07-02 18-05-25\Gachon_190626.
M
Last changed    : 7/3/2019 12:02:43 PM by LCW
                  (modified after loading)
Analysis Method : C:\CHEM32\1\METHODS\DEF_LC.M
Last changed    : 7/4/2019 2:02:03 PM by SYSTEM
                  (modified after loading)
Additional Info  : Peak(s) manually integrated
=====
    
```

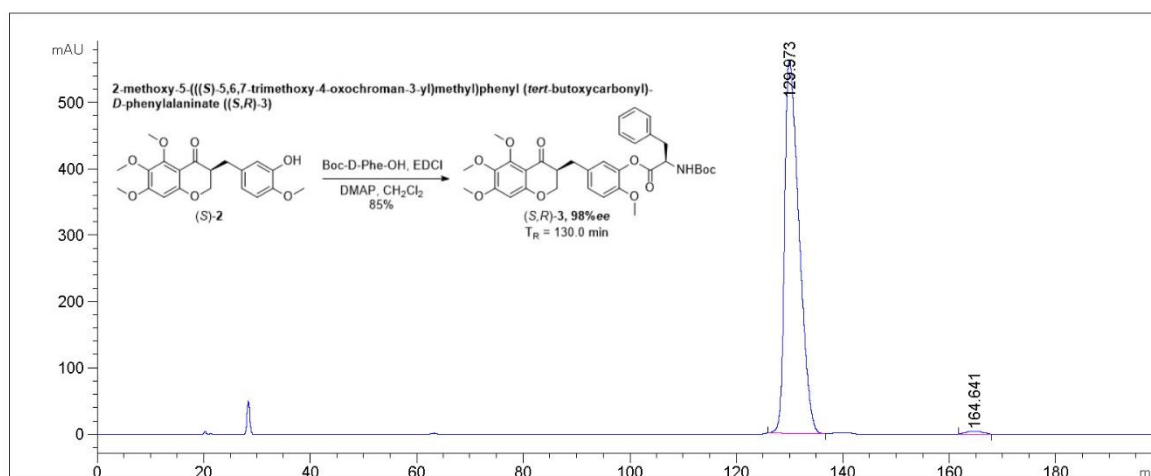

=====  
**Area Percent Report**  
 =====

Sorted By : Signal  
 Multiplier : 1.0000  
 Dilution : 1.0000  
 Do not use Multiplier & Dilution Factor with ISTDs

Signal 1: DAD1 D, Sig=275,4 Ref=off

| Peak # | RetTime [min] | Type | Width [min] | Area [mAU*s] | Height [mAU] | Area %  |
|--------|---------------|------|-------------|--------------|--------------|---------|
| 1      | 129.973       | BB   | 2.4961      | 1.05976e5    | 562.98181    | 99.1107 |
| 2      | 164.641       | MM   | 3.3504      | 950.84723    | 4.73006      | 0.8893  |

Totals : 1.06926e5 567.71188

=====  
 \*\*\* End of Report \*\*\*

24) Racemic 10

Sample Name: 42,43

```

=====
Acq. Operator   :                               Seq. Line :    3
Acq. Instrument : Instrument 1                  Location  : Vial 53
Injection Date  : 4/25/2018 7:27:27 PM         Inj       :    1
                                                Inj Volume: 5.0 µl

Acq. Method     : C:\CHEM32\1\DATA\GACHEON\DEF_LC 2018-04-25 17-53-30\1.M
Last changed    : 4/25/2018 5:53:28 PM
Analysis Method : C:\CHEM32\1\METHODS\DEF_LC.M
Last changed    : 7/3/2019 9:01:44 PM by SYSTEM
                (modified after loading)
Sample Info     : CHIRALPAK AD-3, Hex/EtOH=60/40, Flow rate:1ml/min,
                Sample conc.: 1.2mg/mL, Temp.:RT
    
```

Additional Info : Peak(s) manually integrated

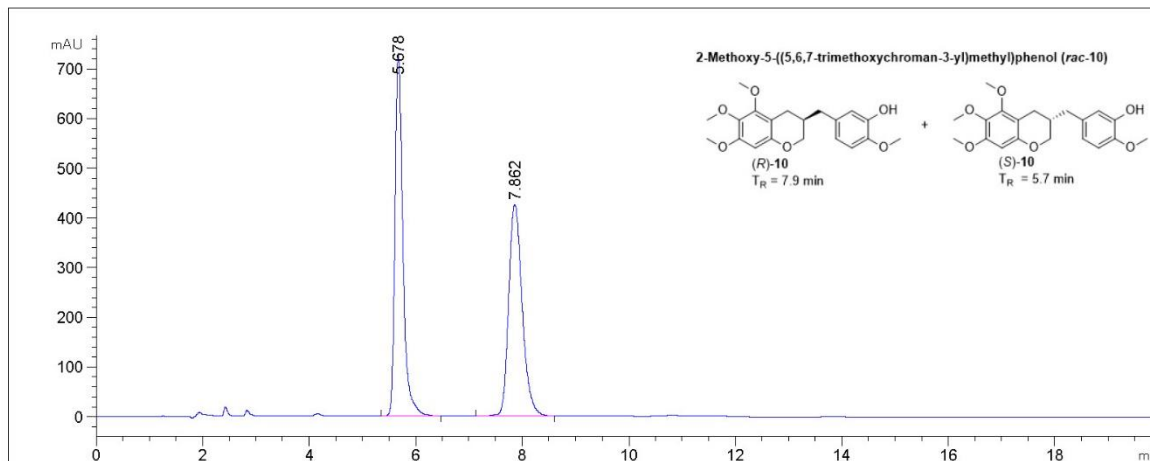

Area Percent Report

```

Sorted By      :      Signal
Multiplier     :      1.0000
Dilution       :      1.0000
Do not use Multiplier & Dilution Factor with ISTDs
    
```

Signal 1: DAD1 D, Sig=230,16 Ref=360,100

| Peak # | RetTime [min] | Type | Width [min] | Area [mAU*s] | Height [mAU] | Area %  |
|--------|---------------|------|-------------|--------------|--------------|---------|
| 1      | 5.678         | BV   | 0.1562      | 7529.20313   | 730.85236    | 50.1190 |
| 2      | 7.862         | BB   | 0.2732      | 7493.46094   | 426.08832    | 49.8810 |

Totals : 1.50227e4 1156.94067

\*\*\* End of Report \*\*\*

25) (S)-10 obtained from (3R,4R)-9a (Scheme 3)

Sample Name: SH18062

```

=====
Acq. Operator   : DAICEL JHJIN                      Seq. Line :    8
Acq. Instrument : Instrument 1                      Location  : Vial 18
Injection Date  : 5/28/2018 4:33:48 PM             Inj       :    2
                                                    Inj Volume: 5.000 µl

Acq. Method     : C:\HPCHEM\1\METHODS\1.M
Last changed    : 5/28/2018 11:02:19 AM by DAICEL JHJIN
Analysis Method : C:\CHEM32\1\METHODS\DEF_LC.M
Last changed    : 7/3/2019 9:01:44 PM by SYSTEM
                (modified after loading)
Sample Info     : CHIRALPAK AD-3, (4.6*150 mm)
                MP: Hex/EtOH=60/40
                Flow rate:1ml/min
    
```

Additional Info : Peak(s) manually integrated

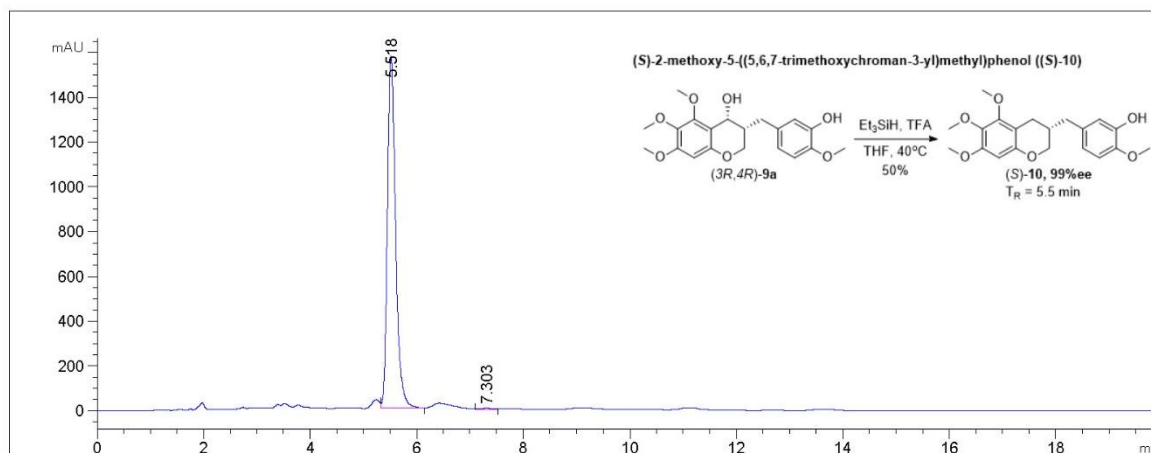

Area Percent Report

```

Sorted By      :      Signal
Multiplier     :      1.0000
Dilution       :      1.0000
Do not use Multiplier & Dilution Factor with ISTDs
    
```

Signal 1: MWD1 C, Sig=210,4 Ref=360,100

| Peak # | RetTime [min] | Type | Width [min] | Area [mAU*s] | Height [mAU] | Area %  |
|--------|---------------|------|-------------|--------------|--------------|---------|
| 1      | 5.518         | VB   | 0.1647      | 1.68238e4    | 1574.21606   | 99.7421 |
| 2      | 7.303         | BV   | 0.1963      | 43.50672     | 2.98027      | 0.2579  |

Totals : 1.68673e4 1577.19633

\*\*\* End of Report \*\*\*

26) (R)-10 obtained from (3S,4S)-9a (Scheme 3)

Sample Name: BL-9-60

```

=====
Acq. Operator   : DAICEL JHJIN                      Seq. Line :    7
Acq. Instrument : Instrument 1                      Location  : Vial 17
Injection Date  : 5/28/2018 3:51:02 PM             Inj       :    2
                                                    Inj Volume: 5.000 µl

Acq. Method     : C:\HPCHEM\1\METHODS\1.M
Last changed    : 5/28/2018 11:02:19 AM by DAICEL JHJIN
Analysis Method : C:\CHEM32\1\METHODS\DEF_LC.M
Last changed    : 7/3/2019 9:01:44 PM by SYSTEM
                (modified after loading)
Sample Info     : CHIRALPAK AD-3, (4.6*150 mm)
                MP: Hex/EtOH=60/40
                Flow rate:1ml/min
    
```

Additional Info : Peak(s) manually integrated

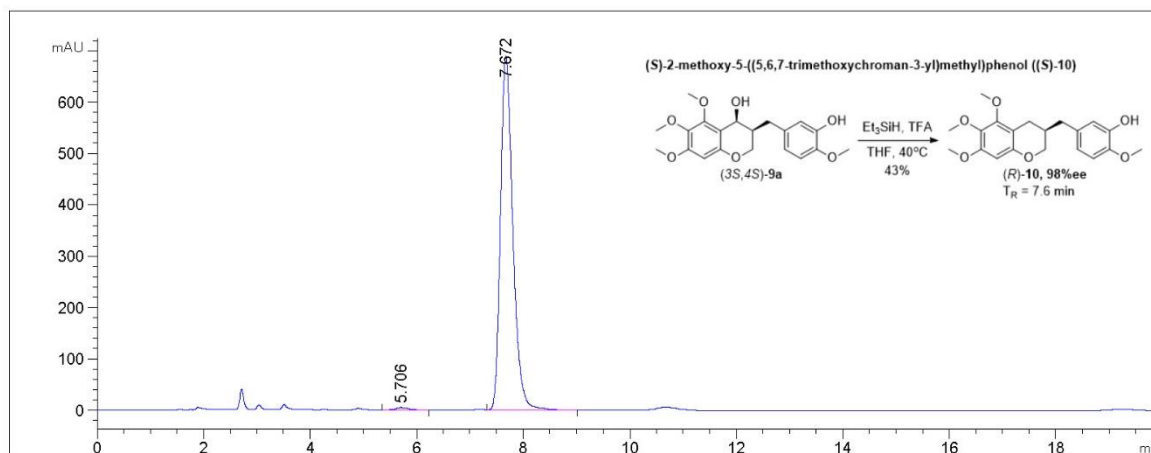

Area Percent Report

```

Sorted By      :      Signal
Multiplier     :      1.0000
Dilution       :      1.0000
Do not use Multiplier & Dilution Factor with ISTDs
    
```

Signal 1: MWD1 D, Sig=230,4 Ref=360,100

| Peak # | RetTime [min] | Type | Width [min] | Area [mAU*s] | Height [mAU] | Area %  |
|--------|---------------|------|-------------|--------------|--------------|---------|
| 1      | 5.706         | VV   | 0.2633      | 91.11793     | 5.33365      | 0.8148  |
| 2      | 7.672         | VV   | 0.2456      | 1.10920e4    | 689.64075    | 99.1852 |

Totals : 1.11831e4 694.97439

\*\*\* End of Report \*\*\*

**27) (R)-11 obtained from (3R,4R)-9d (Scheme 4)**

Sample Name: BL-9-116

```

=====
Acq. Operator   : DAICEL JHJIN                      Seq. Line :    1
Acq. Instrument : Instrument 1                      Location  : Vial 23
Injection Date  : 5/31/2018 6:10:36 AM             Inj       :    1
                                                    Inj Volume: 5.000 µl

Acq. Method     : C:\HPCHEM\1\METHODS\1.M
Last changed    : 5/31/2018 6:09:11 AM by DAICEL JHJIN
Analysis Method : C:\CHEM32\1\METHODS\DEF_LC.M
Last changed    : 7/3/2019 8:44:27 PM by SYSTEM
                (modified after loading)
Sample Info     : CHIRALPAK AD-3, Hex/EtOH=60/40
                Flow rate:1 ml/min
    
```

Additional Info : Peak(s) manually integrated

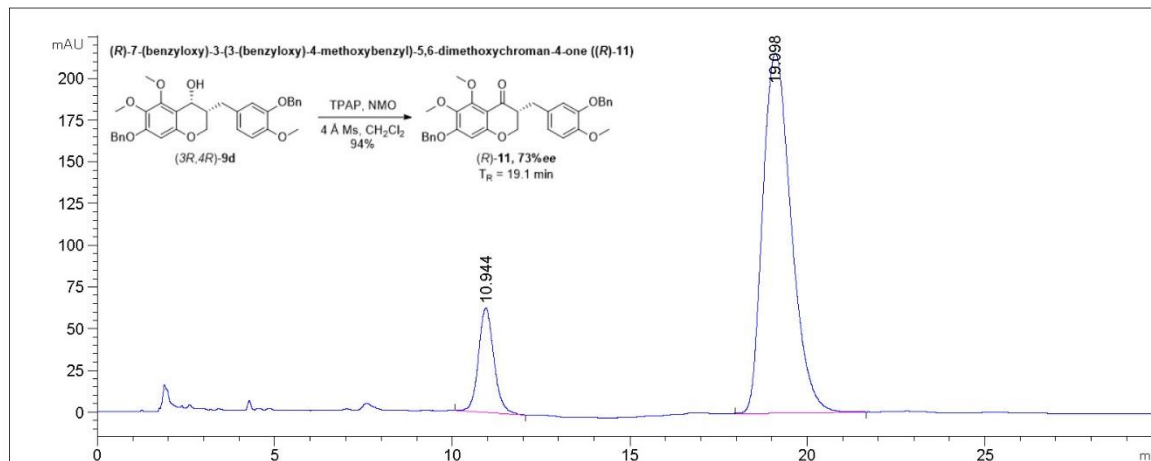

Area Percent Report

```

Sorted By      :      Signal
Multiplier     :      1.0000
Dilution      :      1.0000
Do not use Multiplier & Dilution Factor with ISTDs
    
```

Signal 1: MWD1 D, Sig=230,4 Ref=360,100

| Peak # | RetTime [min] | Type | Width [min] | Area [mAU*s] | Height [mAU] | Area %  |
|--------|---------------|------|-------------|--------------|--------------|---------|
| 1      | 10.944        | BB   | 0.4583      | 1883.71021   | 62.73454     | 13.5821 |
| 2      | 19.098        | VV   | 0.8603      | 1.19854e4    | 215.68436    | 86.4179 |

Totals : 1.38691e4 278.41889

\*\*\* End of Report \*\*\*

**28) (S)-11 obtained from (3S,4S)-9d (Scheme 4)**

Sample Name: BL-9-117

```

=====
Acq. Operator   : DAICEL JHJIN                      Seq. Line :    2
Acq. Instrument : Instrument 1                       Location  : Vial 24
Injection Date  : 5/31/2018 6:42:10 AM              Inj       :    1
                                                    Inj Volume: 5.000 µl

Acq. Method     : C:\HPCHEM\1\METHODS\1.M
Last changed    : 5/31/2018 6:09:11 AM by DAICEL JHJIN
Analysis Method : C:\CHEM32\1\METHODS\DEF_LC.M
Last changed    : 7/3/2019 8:44:27 PM by SYSTEM
                (modified after loading)
Sample Info     : CHIRALPAK AD-3, ACN/MeOH=50/50
                Flow rate:0.5ml/min
    
```

Additional Info : Peak(s) manually integrated

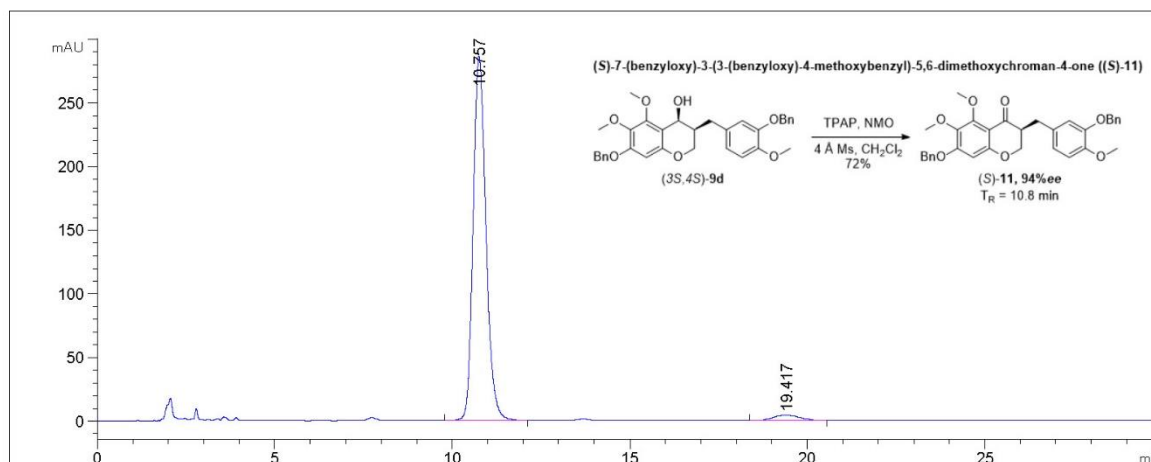

Area Percent Report

```

Sorted By      :      Signal
Multiplier     :      1.0000
Dilution       :      1.0000
Do not use Multiplier & Dilution Factor with ISTDs
    
```

Signal 1: MWD1 D, Sig=230,4 Ref=360,100

| Peak # | RetTime [min] | Type | Width [min] | Area [mAU*s] | Height [mAU] | Area %  |
|--------|---------------|------|-------------|--------------|--------------|---------|
| 1      | 10.757        | BB   | 0.3862      | 7159.33008   | 285.88214    | 96.9479 |
| 2      | 19.417        | VV   | 0.6311      | 225.39233    | 4.26092      | 3.0521  |

Totals : 7384.72241 290.14306

\*\*\* End of Report \*\*\*



**29) (R)-1 obtained from (R)-11 (Scheme 4)**

Sample Name: SH18055

```

=====
Acq. Operator   : DAICEL JHJIN                      Seq. Line :    4
Acq. Instrument : Instrument 1                      Location  : Vial 13
Injection Date  : 5/29/2018 11:52:53 AM           Inj       :    2
                                                    Inj Volume: 5.000 µl

Acq. Method     : C:\HPCHEM\1\METHODS\1.M
Last changed    : 5/29/2018 7:50:02 AM by DAICEL JHJIN
Analysis Method : C:\CHEM32\1\METHODS\DEF_LC.M
Last changed    : 7/3/2019 9:09:21 PM by SYSTEM
                (modified after loading)
Sample Info     : CHIRALPAK AD-3, ACN/MeOH=50/50
                Flow rate:0.5ml/min
    
```

Additional Info : Peak(s) manually integrated

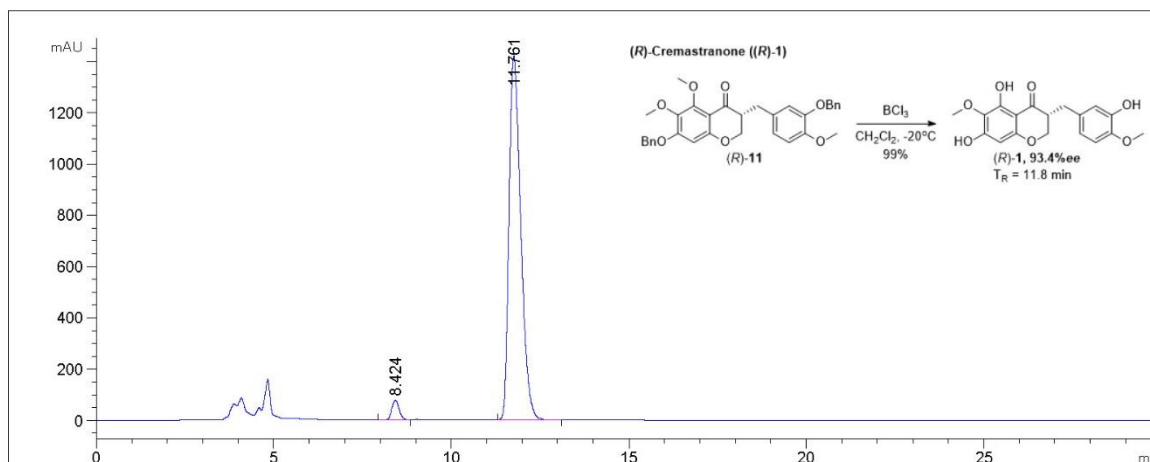

Area Percent Report

```

Sorted By      :      Signal
Multiplier     :      1.0000
Dilution       :      1.0000
Do not use Multiplier & Dilution Factor with ISTDs
    
```

Signal 1: MWD1 D, Sig=230,4 Ref=360,100

| Peak # | RetTime [min] | Type | Width [min] | Area [mAU*s] | Height [mAU] | Area %  |
|--------|---------------|------|-------------|--------------|--------------|---------|
| 1      | 8.424         | BV   | 0.2230      | 1128.36243   | 77.89248     | 3.3472  |
| 2      | 11.761        | VV   | 0.3555      | 3.25827e4    | 1420.93640   | 96.6528 |

Totals : 3.37111e4 1498.82888

\*\*\* End of Report \*\*\*

**30) (S)-1 obtained from (S)-11 (Scheme 4)**

Sample Name: SH18054

```

=====
Acq. Operator   : DAICEL JHJIN                      Seq. Line :    3
Acq. Instrument : Instrument 1                      Location  : Vial 12
Injection Date  : 5/29/2018 10:50:09 AM           Inj       :    2
                                                    Inj Volume: 5.000 µl

Acq. Method    : C:\HPCHEM\1\METHODS\1.M
Last changed   : 5/29/2018 7:50:02 AM by DAICEL JHJIN
Analysis Method: C:\CHEM32\1\METHODS\DEF_LC.M
Last changed   : 7/3/2019 9:09:21 PM by SYSTEM
                (modified after loading)
Sample Info    : CHIRALPAK AD-3, ACN/MeOH=50/50
                Flow rate:0.5ml/min
    
```

Additional Info : Peak(s) manually integrated

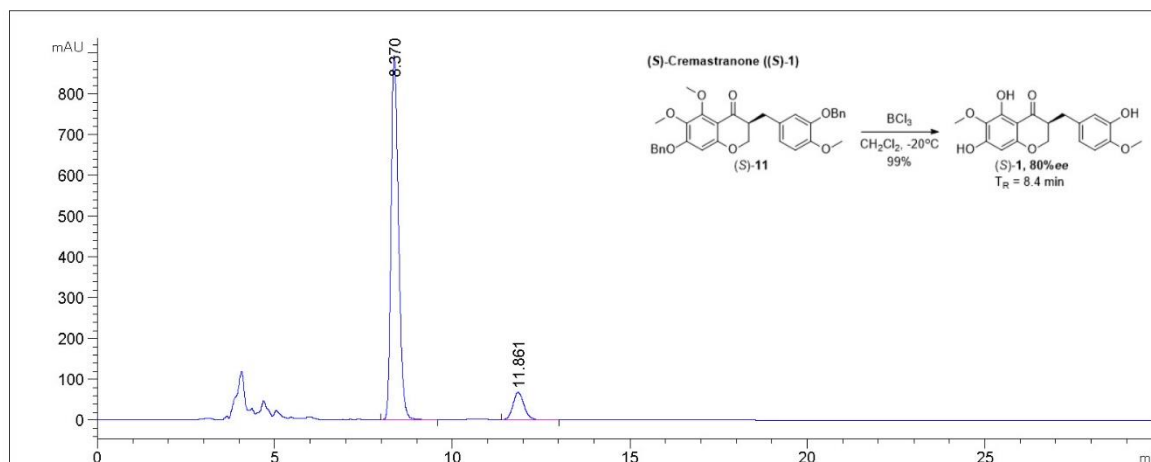

=====  
**Area Percent Report**  
 =====

```

Sorted By      :      Signal
Multiplier     :      1.0000
Dilution      :      1.0000
Do not use Multiplier & Dilution Factor with ISTDs
    
```

Signal 1: MWD1 D, Sig=230,4 Ref=360,100

| Peak # | RetTime [min] | Type | Width [min] | Area [mAU*s] | Height [mAU] | Area %  |
|--------|---------------|------|-------------|--------------|--------------|---------|
| 1      | 8.370         | BB   | 0.2271      | 1.30802e4    | 891.95026    | 89.9499 |
| 2      | 11.861        | VB   | 0.3372      | 1461.44934   | 67.34049     | 10.0501 |

Totals :                      1.45416e4    959.29075

=====  
 \*\*\* End of Report \*\*\*
